# Supplementary material for: Iridium/chiral phosphoramidite–olefin complex-catalysed enantioselective [3+2] annulation of ortho-ketoarylboron compounds with conjugated dienes
Source: Royal Society of Chemistry journal article supplement (doi:10.1039/d4cc04238g), 2024-01-01
Supplement: d4cc04238g1.pdf [file d4cc04238g1.pdf]

## Supplementary Information

### Iridium/chiral phosphoramidite-olefin complex-catalysed enantioselective [3+2] annulation of *ortho*-ketoarylboron compounds with conjugated dienes

Ryota Yabe and Takahiro Nishimura\*

Department of Chemistry, Graduate School of Science, Osaka Metropolitan University, Sumiyoshi, Osaka 558-8585, Japan. E-mail: tnishi@omu.ac.jp

#### Contents of Supplementary Information

|                                                                                                 |      |
|-------------------------------------------------------------------------------------------------|------|
| 1. General Information                                                                          | S-2  |
| 2. Materials                                                                                    | S-2  |
| 3. Preparation of Phosphoramidite-Olefin Ligands                                                | S-3  |
| 4. Preparation of Boron Reagents                                                                | S-7  |
| 5. Preparation of 1,3-Dienes                                                                    | S-12 |
| 6. Procedure for Tables 1 and 2                                                                 | S-12 |
| 7. Procedure for Scheme 2                                                                       | S-12 |
| 8. Procedure for Scheme 3                                                                       | S-13 |
| 9. Procedure for Scheme 4                                                                       | S-13 |
| 10. Other Experimental Data                                                                     | S-14 |
| 11. Characterization of the Products                                                            | S-16 |
| 12. Transformation of <b>3ga</b> (Scheme 5)                                                     | S-26 |
| 13. Determination of the Absolute Configuration                                                 | S-28 |
| 14. References                                                                                  | S-31 |
| 15. <sup>1</sup> H NMR, <sup>13</sup> C NMR, <sup>31</sup> P NMR Spectra and Chiral HPLC Charts | S-32 |

## 1. General Information

All manipulations of oxygen- and moisture-sensitive materials were carried out using standard Schlenk techniques under a nitrogen atmosphere. NMR spectra were recorded on JEOL JNM ECZ-400 spectrometer (400 MHz for  $^1\text{H}$ , 100 MHz for  $^{13}\text{C}$ ) or Bruker Avance III HD 400 spectrometer (400 MHz for  $^1\text{H}$ , 100 MHz for  $^{13}\text{C}$ , 162 MHz for  $^{31}\text{P}$ ). Chemical shifts are reported in  $\delta$  (ppm) referenced to the residual peaks of  $\text{CDCl}_3$  ( $\delta$  7.26) for  $^1\text{H}$  NMR,  $\text{CDCl}_3$  ( $\delta$  77.00) and  $\text{CD}_3\text{COCD}_3$  ( $\delta$  29.80) for  $^{13}\text{C}$  NMR. The following abbreviations are used; s, singlet; d, doublet; t, triplet; q, quartet; quint, quintet; m, multiplet; br, broad. High-resolution mass spectra were obtained with JEOL AccuTOF LC-plus 4G spectrometer. Preparative thin-layer chromatography was performed with Silica Gel 70 PF<sub>254</sub> (Wako). Alumina (active 200) for column chromatography was purchased from Nacalai Tesque.

## 2. Materials

Dehydrated solvents were purchased and used after deoxygenated by bubbling  $\text{N}_2$ .  $[\text{IrCl}(\text{coe})_2]_2$  was prepared according to the reported procedures.<sup>1</sup> Other solvents and chemicals were purchased from commercial suppliers and used as received.

### 3. Preparation of Phosphoramidite-Olefin Ligands

Phosphoramidite-olefine ligands **L2**, **L3** and **L5** were prepared from iminostilbene by typical procedures as shown below.

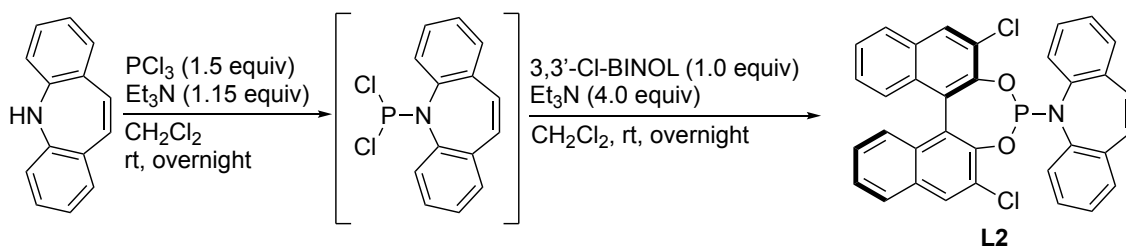

To a solution of  $\text{PCl}_3$  (0.21 g, 1.5 equiv) in  $\text{CH}_2\text{Cl}_2$  (10 mL) was added a mixture of  $\text{Et}_3\text{N}$  (0.12 g, 1.15 equiv) and iminostilbene (0.19 g, 1.0 mmol) in  $\text{CH}_2\text{Cl}_2$  (5 mL) at  $0\text{ }^\circ\text{C}$  under  $\text{N}_2$  atmosphere. After completion of the addition, the mixture was stirred at room temperature overnight. The yellow solution was concentrated on a rotary evaporator to remove excess  $\text{PCl}_3$ . The yellow residue was redissolved in  $\text{CH}_2\text{Cl}_2$  (10 mL), and  $\text{Et}_3\text{N}$  (4.1 g, 4.0 equiv) and (1*R*)-3,3'-dichloro[1,1'-binaphthalene]-2,2'-diol (1.0 equiv) were added to the solution at  $0\text{ }^\circ\text{C}$  under  $\text{N}_2$  atmosphere. After the mixture was stirred at room temperature overnight, the resulting mixture was concentrated on a rotary evaporator, and the residue was subjected to column chromatography on silica gel eluted with a mixture of hexane and  $\text{CH}_2\text{Cl}_2$  (10:3) containing 3% of  $\text{Et}_3\text{N}$  to give **L2** as a colorless solid (0.18 g, 32% yield).  $[\alpha]_D^{25} -492$  ( $c$  1.02,  $\text{CHCl}_3$ ) for 99% ee;  $^1\text{H}$  NMR (400 MHz,  $\text{CDCl}_3$ )  $\delta$  8.09 (s, 1H), 7.82 (d,  $J = 8.0$  Hz, 1H), 7.73 (t,  $J = 8.0$  Hz, 2H), 7.43–7.37 (m, 3H), 7.23–6.89 (m, 12H), 6.58–6.54 (m, 1H);  $^{13}\text{C}\{^1\text{H}\}$  NMR (100 MHz,  $\text{CDCl}_3$ )  $\delta$  145.9 (d,  $^2J_{\text{P-C}} = 8$  Hz), 144.7, 142.3, 142.1, 142.0 (d,  $^2J_{\text{P-C}} = 6$  Hz), 136.02, 135.98, 135.8, 131.9, 131.3, 131.2, 131.1, 130.8, 130.1, 129.5, 129.2, 129.0, 128.8 (d,  $^2J_{\text{P-C}} = 6$  Hz), 128.5 (d,  $^2J_{\text{P-C}} = 4$  Hz), 128.2, 127.7, 127.6, 127.5, 127.0, 126.77, 126.75, 126.6, 126.4, 126.3, 126.1, 125.9, 125.6, 123.0, 122.0;  $^{31}\text{P}$  NMR (162 MHz,  $\text{CDCl}_3$ )  $\delta$  139.1. HRMS (DART)  $m/z$ :  $[\text{M} + \text{H}]^+$  Calcd for  $\text{C}_{33}\text{H}_{21}\text{NO}_2\text{PCl}_2$  576.0682; Found 576.0660.

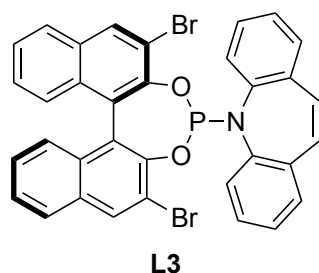

**L3** was prepared according to the procedures for **L2** using (1*R*)-3,3'-dibromo[1,1'-binaphthalene]-2,2'-diol. **L3** (0.20 g, 30% yield, colorless solid);  $[\alpha]_D^{25} - 492$  (*c* 0.98, CHCl<sub>3</sub>) for 99% ee; <sup>1</sup>H NMR (400 MHz, CDCl<sub>3</sub>) δ 8.26 (s, 1H), 7.98 (s, 1H), 7.81 (d, *J* = 8.4 Hz, 1H), 7.74 (d, *J* = 8.8 Hz, 1H), 7.48 (d, *J* = 8.4 Hz, 1H), 7.43–7.38 (m, 2H), 7.26–6.93 (m, 12H), 6.64 (m, 1H); <sup>13</sup>C{<sup>1</sup>H} NMR (100 MHz, CDCl<sub>3</sub>) δ 146.5 (d, <sup>2</sup>*J*<sub>P-C</sub> = 9 Hz), 145.5, 142.2, 142.1 (d, <sup>2</sup>*J*<sub>P-C</sub> = 3 Hz), 142.0, 136.0, 132.9, 132.2, 131.8, 131.7, 131.6, 130.9, 130.6, 129.3, 128.9, 128.7, 128.57, 128.53, 128.3, 127.7 (d, <sup>2</sup>*J*<sub>P-C</sub> = 9 Hz), 127.4, 126.9, 126.83, 126.75, 126.6, 126.5, 126.4, 126.3, 125.8, 125.5, 125.2 (d, <sup>2</sup>*J*<sub>P-C</sub> = 5 Hz), 122.8, 116.3, 116.1; <sup>31</sup>P NMR (162 MHz, CDCl<sub>3</sub>) δ 138.7. HRMS (DART) *m/z*: [M + H]<sup>+</sup> Calcd for C<sub>33</sub>H<sub>21</sub>NO<sub>2</sub>PBr<sub>2</sub> 663.9671; Found 663.9683.

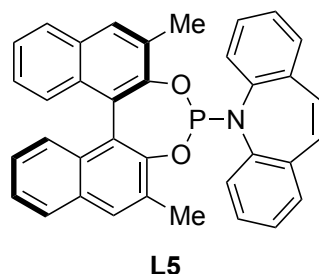

**L5** was prepared according to the procedures for **L2** using (1*R*)-3,3'-dimethyl[1,1'-binaphthalene]-2,2'-diol. **L5** (0.19 g, 35% yield, colorless solid);  $[\alpha]_D^{25} - 471$  (*c* 0.97, CHCl<sub>3</sub>) for 99% ee; <sup>1</sup>H NMR (400 MHz, CDCl<sub>3</sub>) δ 7.82–7.80 (m, 2H), 7.71 (d, *J* = 8.4 Hz, 1H), 7.43 (s, 1H), 7.36–7.30 (m, 3H), 7.21–6.95 (m, 10H), 6.90 (s, 2H), 6.51 (t, *J* = 7.2 Hz, 1H), 2.72 (s, 3H), 2.42 (s, 3H); <sup>13</sup>C{<sup>1</sup>H} NMR (100 MHz, CDCl<sub>3</sub>) δ 149.2, 149.1, 148.1 (d, <sup>2</sup>*J*<sub>P-C</sub> = 2 Hz), 143.03, 142.97, 142.9, 142.8, 136.0 (d, <sup>2</sup>*J*<sub>P-C</sub> = 3 Hz), 135.1, 131.7, 131.5, 131.3, 130.4, 130.1, 129.7, 129.0, 128.8, 128.5, 128.35, 128.33, 127.7, 127.6, 127.5, 127.0, 126.8, 126.4, 126.1, 125.1, 124.8, 124.7, 124.3, 124.1, 124.0, 121.4, 18.2, 17.6; <sup>31</sup>P NMR (162 MHz, CDCl<sub>3</sub>) δ 137.0; HRMS (DART) *m/z*: [M + H]<sup>+</sup> Calcd for C<sub>36</sub>H<sub>27</sub>NO<sub>2</sub>P 536.1774; Found 536.1773.

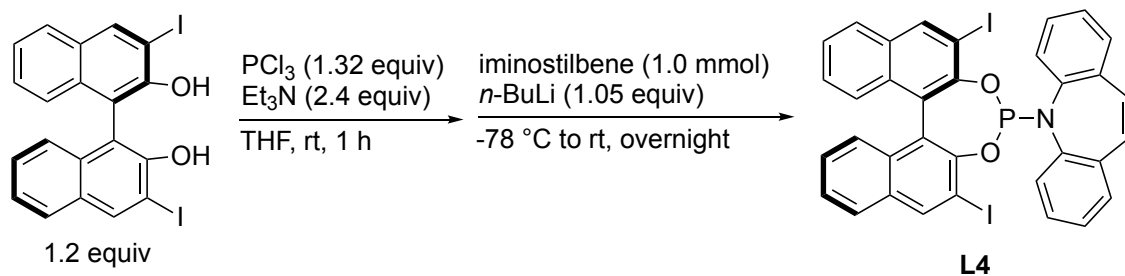

To a solution of  $\text{PCl}_3$  (0.18 g, 1.32 equiv) in THF (3 mL) was added a mixture of  $\text{Et}_3\text{N}$  (0.24 g, 2.4 equiv), (1*R*)-3,3'-diiodo[1,1'-binaphthalene]-2,2'-diol (0.65 g, 1.2 equiv), and THF (3 mL) at 0 °C under  $\text{N}_2$  atmosphere. After completion of the addition, the mixture was stirred at room temperature for an hour. The resulting mixture was filtered through celite, and the filter cake was washed with THF. The filtrate was concentrated on a rotary evaporator. The resulting solid was dissolved in THF (6 mL) and the solution was used for the further reaction. To a solution of iminostilbene (0.19 g, 1.0 mmol) in THF (5 mL) was slowly added *n*-BuLi (ca. 15% in hexane) (0.66 mL, 1.05 equiv) at -78 °C under  $\text{N}_2$  atmosphere, and the mixture was stirred at the same temperature for an hour. To the resulting blue solution was slowly added the THF solution prepared in the previous step. After completion of the addition, the mixture was stirred at room temperature overnight. The resulting orange solution was concentrated on a rotary evaporator, and the residue was subjected to column chromatography on silica gel eluted with a solution of hexane and  $\text{CH}_2\text{Cl}_2$  (10:3) containing 3% of  $\text{Et}_3\text{N}$  to give **L4** as a colorless solid (0.27 g, 35% yield).  $[\alpha]_{\text{D}}^{25} -468$  (*c* 1.02,  $\text{CHCl}_3$ ) for 99% ee;  $^1\text{H}$  NMR (400 MHz,  $\text{CDCl}_3$ )  $\delta$  8.49 (s, 1H), 8.29 (s, 1H), 7.78–7.72 (m, 2H), 7.62 (d, *J* = 8.0 Hz, 1H), 7.41–7.35 (m, 2H), 7.24–6.87 (m, 12H), 6.71 (m, 1H);  $^{13}\text{C}\{^1\text{H}\}$  NMR (100 MHz,  $\text{CDCl}_3$ )  $\delta$  148.5, 148.4, 147.6 (d,  $^2J_{\text{P-C}} = 2$  Hz), 142.4, 142.3, 141.9, 141.8, 136.0, 135.9 (d,  $^2J_{\text{P-C}} = 2$  Hz), 132.4, 131.9, 131.3, 131.1, 129.4, 128.8, 128.70, 128.65, 128.5, 128.4, 127.8, 127.7, 127.2, 126.8, 126.73, 126.70, 126.5, 125.6, 125.3, 124.15, 124.09, 121.68, 121.66, 91.4, 91.0;  $^{31}\text{P}$  NMR (162 MHz,  $\text{CDCl}_3$ )  $\delta$  138.1; HRMS (DART)  $m/z$ :  $[\text{M} + \text{H}]^+$  Calcd for  $\text{C}_{34}\text{H}_{21}\text{O}_2\text{NPI}_2$  759.9394; Found 759.9376.

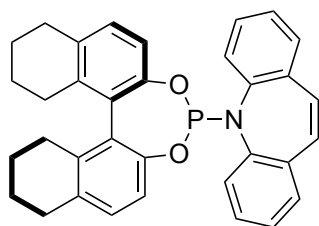

**L6**

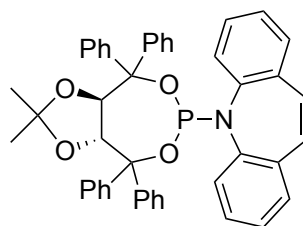

**L7**

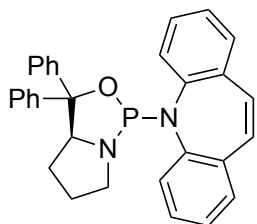

**L8**

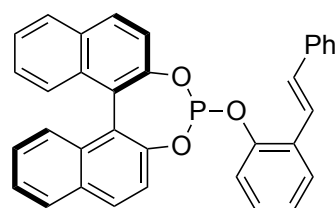

**L9**

Known P-olefin ligands (*rac*)-**L1** (CAS: 1809289-27-7), (*R*)-**L1** (CAS: 1265884-98-7), **L6** (CAS: 2070926-11-1), **L7** (CAS: 1092695-14-1), **L8** (CAS: 1092695-17-4), and **L9** (CAS: 1638298-36-8) were prepared according to the reported procedures.<sup>1</sup>

#### 4. Preparation of Boron Reagents

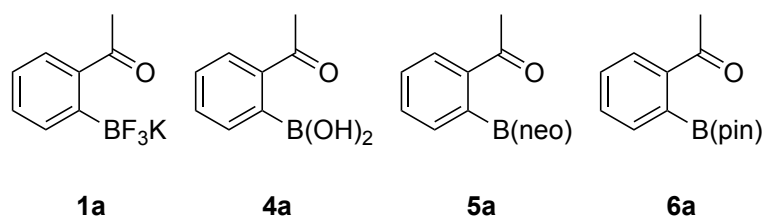

**4a** was purchased from commercial suppliers and used as received. **1a** (CAS: 1258323-44-2) was prepared from **4a** according to the reported procedures.<sup>3</sup> **5a** (CAS: 849412-53-9) was prepared from **4a** by the procedures shown below.

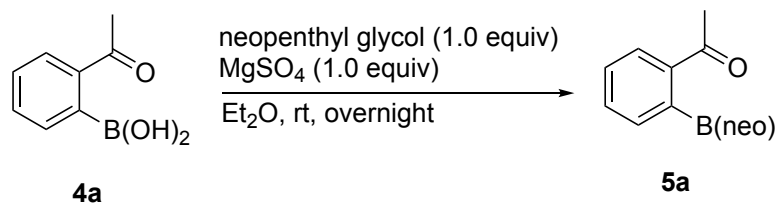

**4a** (82.0 mg, 0.50 mmol), neopentyl glycol (50.6 mg, 1.0 equiv), MgSO<sub>4</sub> (12.0 mg, 1.0 equiv), and Et<sub>2</sub>O (0.3 mL) were placed in a round-bottom flask. The mixture was stirred at room temperature overnight, and the resulting mixture was concentrated on a rotary evaporator. The residue was subjected to preparative TLC on silica gel eluted with EtOAc/hexane (1:5) to give **5a** (57.6 mg, 50% yield).

**6a** (CAS: 325141-75-1) was prepared from **4a** as shown below.

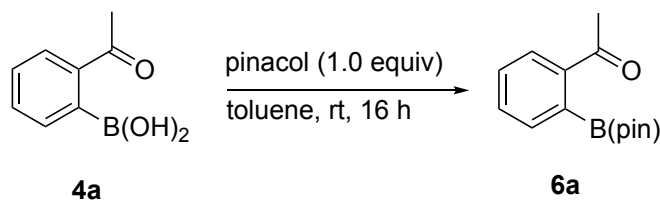

**4a** (82.0 mg, 0.50 mmol), pinacol (59.1 mg, 1.0 equiv), and toluene (0.3 mL) were placed in a round flask. The mixture was stirred at the room temperature for 16 h, and the resulting mixture was concentrated on a rotary evaporator. The residue was subjected to preparative TLC on silica gel eluted with EtOAc/hexane (1:5) to give **6a** (84.0 mg, 68% yield).

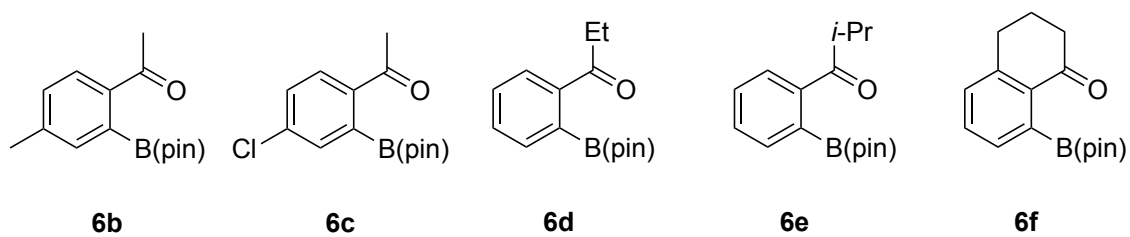

**6b** (CAS: 1350374-39-8), **6c** (CAS: 1350374-40-1), **6d** (CAS: 1350374-35-4), **6e** (CAS: 1350374-36-5), and **6f** (CAS: 2377067-16-6) were prepared according to the reported procedures.<sup>4</sup>

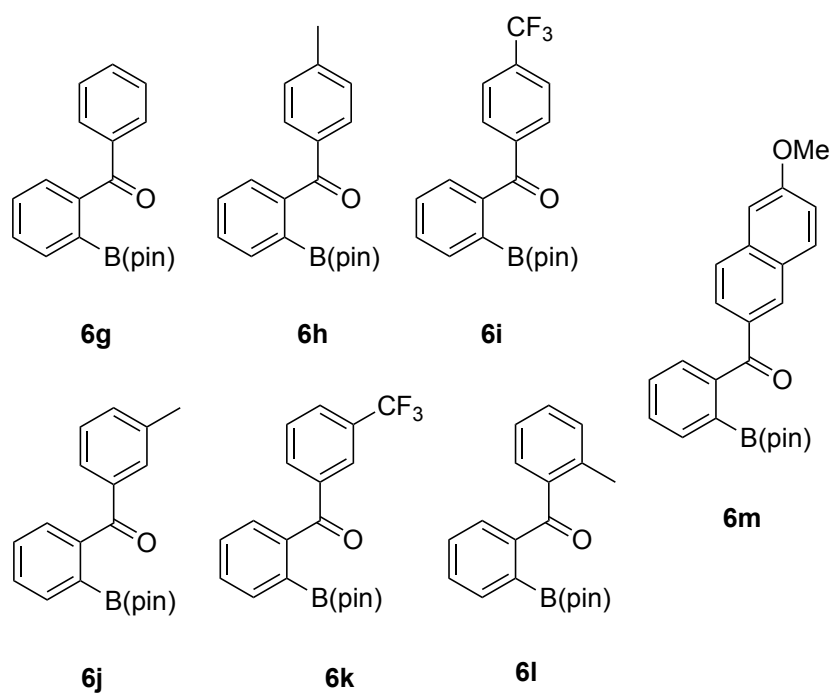

**6g** (CAS: 949115-05-3), **6h** (CAS: 1622886-59-2), **6i**, **6j**, **6k**, **6l** (CAS: 2053897-25-7), and **6m** were prepared from the corresponding aryl *o*-bromophenyl ketones according to the typical procedures shown below.



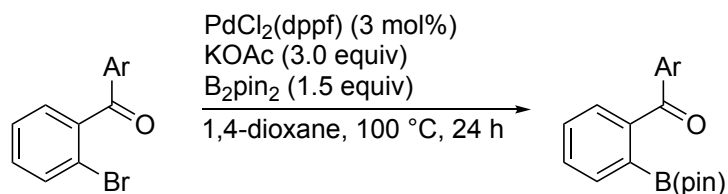

Aryl bromide (1.0–3.0 mmol), PdCl<sub>2</sub>(dppf) (3 mol%), KOAc (3.0 equiv), and B<sub>2</sub>pin<sub>2</sub> (1.5 equiv) were placed in a Schlenk tube under N<sub>2</sub>. 1,4-Dioxane (5 mL/mmol) was added to the mixture. The Schlenk tube was capped with a glass stopper and the mixture was stirred at 100 °C for 24 h. The mixture was extracted with CH<sub>2</sub>Cl<sub>2</sub>, dried over Na<sub>2</sub>SO<sub>4</sub>, filtered, and concentrated on a rotary evaporator. The residue was subjected to column chromatography on silica gel eluted with hexane/EtOAc (20:1–10:1) to give **6g–6m**.

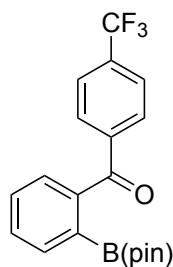

**6i**

**Compound 6i** (68% yield, colorless solid). <sup>1</sup>H NMR (400 MHz, CDCl<sub>3</sub>) δ 7.88 (d, *J* = 8.0 Hz, 2H), 7.78 (d, *J* = 6.8 Hz, 1H), 7.71 (d, *J* = 8.0 Hz, 2H), 7.58–7.50 (m, 3H), 1.18 (s, 12H); <sup>13</sup>C{<sup>1</sup>H} NMR (100 MHz, CDCl<sub>3</sub>) δ 197.1, 142.9, 141.1, 134.1, 133.7 (q, <sup>2</sup>*J*<sub>F-C</sub> = 32 Hz), 130.8, 130.1, 129.9, 128.8, 125.1 (q, <sup>3</sup>*J*<sub>F-C</sub> = 4 Hz), 123.7 (q, <sup>1</sup>*J*<sub>F-C</sub> = 272 Hz), 84.1, 24.4. The carbon directly attached to the boron atom was not detected due to quadrupolar broadening. HRMS (DART) *m/z*: [M + H]<sup>+</sup> Calcd for C<sub>20</sub>H<sub>21</sub>BF<sub>3</sub>O<sub>3</sub> 377.1530; Found 377.1515.

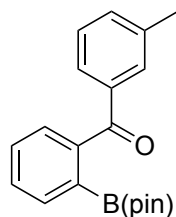

**6j**

**Compound 6j** (76% yield, pale yellow oil).  $^1\text{H}$  NMR (400 MHz,  $\text{CDCl}_3$ )  $\delta$  7.73 (d,  $J = 6.4$  Hz, 1H), 7.61 (s, 1H), 7.56–7.44 (m, 4H), 7.36–7.29 (m, 2H), 2.38 (s, 3H), 1.19 (s, 12H);  $^{13}\text{C}\{^1\text{H}\}$  NMR (100 MHz,  $\text{CDCl}_3$ )  $\delta$  198.2, 143.5, 138.0, 137.9, 133.6, 133.0, 130.32, 130.27, 129.5, 129.0, 128.0, 127.3, 83.9, 24.4, 21.2. The carbon directly attached to the boron atom was not detected due to quadrupolar broadening. HRMS (DART)  $m/z$ :  $[\text{M} + \text{H}]^+$  Calcd for  $\text{C}_{20}\text{H}_{24}\text{BO}_3$  323.1813; Found 323.1825.

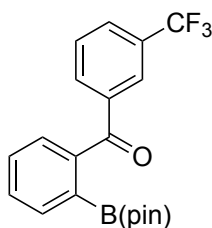

**6k**

**Compound 6k** (54% yield, pale yellow solid).  $^1\text{H}$  NMR (400 MHz,  $\text{CDCl}_3$ )  $\delta$  8.08 (s, 1H), 7.90 (d,  $J = 7.6$  Hz, 1H), 7.81–7.78 (m, 2H), 7.58–7.49 (m, 4H), 1.15 (s, 12H);  $^{13}\text{C}\{^1\text{H}\}$  NMR (100 MHz,  $\text{CDCl}_3$ )  $\delta$  196.9, 143.1, 138.9, 134.3, 133.1, 130.9 (q,  $^2J_{\text{F-C}} = 33$  Hz), 130.6, 130.1, 128.8, 128.7, 128.6, 126.5 (q,  $^3J_{\text{F-C}} = 4\text{Hz}$ ), 123.7 (q,  $^1J_{\text{F-C}} = 270$  Hz), 84.1, 24.4. The carbon directly attached to the boron atom was not detected due to quadrupolar broadening. HRMS (DART)  $m/z$ :  $[\text{M} + \text{H}]^+$  Calcd for  $\text{C}_{20}\text{H}_{21}\text{BF}_3\text{O}_3$  377.1530; Found 377.1542.

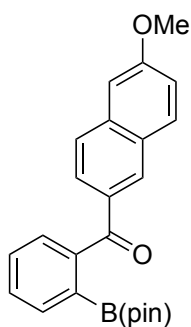

**6m**

**Compound 6m** (46% yield, pale yellow solid).  $^1\text{H}$  NMR (400 MHz,  $\text{CDCl}_3$ )  $\delta$  8.08 (s, 1H), 7.98 (dd,  $J = 8.6$  Hz, 1.4 Hz, 1H), 7.80–7.74 (m, 3H), 7.60–7.49 (m, 3H), 7.18–7.15 (m, 2H), 3.95 (s, 3H), 1.10 (s, 12H);  $^{13}\text{C}\{^1\text{H}\}$  NMR (100 MHz,  $\text{CDCl}_3$ )  $\delta$  198.0, 159.6, 133.9, 133.5, 132.1, 131.0, 130.0, 129.8, 128.7, 126.9, 126.2, 119.5, 105.7, 83.9, 55.4, 24.5. The carbon directly attached to the boron atom was not detected due to quadrupolar broadening. HRMS (DART)  $m/z$ :  $[\text{M} + \text{H}]^+$  Calcd for  $\text{C}_{24}\text{H}_{26}\text{BO}_4$  389.1919; Found 389.1920.

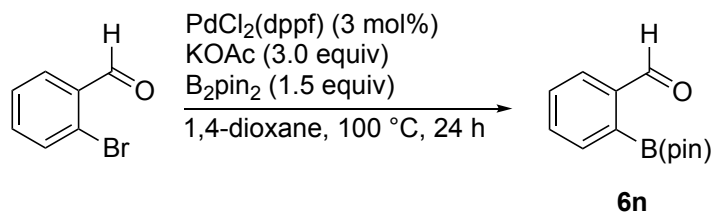

**6n**

**6n** (CAS: 380151-85-9) was prepared from the aryl *o*-bromophenyl aldehyde same as above procedures.

## 5. Preparation of 1,3-Dienes

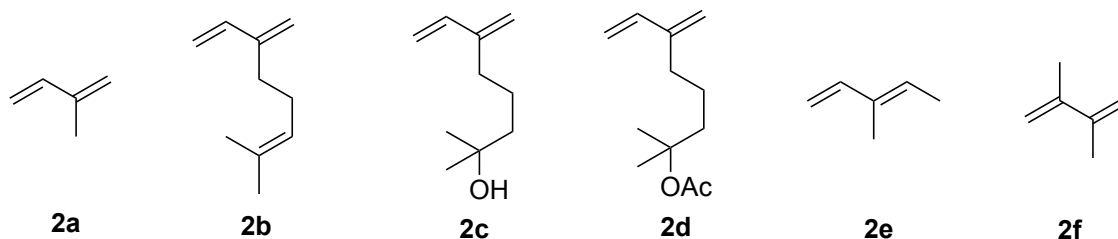

Dienes **2a**, **2b**, **2e**, and **2f** were purchased from commercial suppliers and used as received. **2c** (CAS: 543-39-5) and **2d** (CAS: 118-39-4) were prepared from **2b** according to the reported procedures.<sup>5</sup>

## 6. Procedure for Tables 1 and 2

$[\text{IrCl}(\text{coe})_2]_2$  (4.5 mg, 0.0050 mmol, 5 mol% of Ir) and (*rac*)- or (*R*)-**L1** (6.1 mg, 0.012 mmol, 6 mol%) were placed in a Schlenk tube under  $\text{N}_2$ . Toluene (0.8 mL) was added to the tube, and the resulting mixture was stirred at room temperature for 15 min. To the resulting red solution were added boron reagents **1a**, **4a–6a** (0.20 mmol),  $\text{Et}_3\text{N}$  (36  $\mu\text{L}$ , 0.26 mmol, 1.3 equiv),  $\text{H}_2\text{O}$  (0.8 mL), and isoprene (**2a**) (40.9 mg, 0.60 mmol, 3.0 equiv). The Schlenk tube was capped with a glass stopper and stirred at 80 °C for 24 h. The resulting mixture was extracted with  $\text{Et}_2\text{O}$ , dried over  $\text{MgSO}_4$ , filtered, and concentrated on a rotary evaporator. The residue was subjected to preparative TLC on silica gel eluted with  $\text{EtOAc}$ /hexane (1:4) to give **3aa**.

## 7. Procedure for Scheme 2

$[\text{IrCl}(\text{coe})_2]_2$  (4.5 mg, 0.0050 mmol, 5 mol% of Ir) and **L2–L9** (0.012 mmol, 6 mol%) were placed in a Schlenk tube under  $\text{N}_2$ . Toluene (0.8 mL) was added to the tube, and the resulting mixture was stirred at room temperature for 15 min. To the resulting red solution were added **1a** (0.20 mmol),  $\text{Et}_3\text{N}$  (36  $\mu\text{L}$ , 0.26 mmol, 1.3 equiv),  $\text{H}_2\text{O}$  (0.8 mL), and isoprene (**2a**) (40.9 mg, 0.60 mmol, 3.0 equiv). The Schlenk tube was capped with a glass stopper and the mixture was stirred at 80 °C for 24 h. The resulting mixture was extracted with  $\text{Et}_2\text{O}$ , dried over  $\text{MgSO}_4$ , filtered, and concentrated on a rotary evaporator. The residue was subjected to preparative TLC on silica gel eluted with  $\text{EtOAc}$ /hexane (1:4) to give **3aa**. The ee was measured by chiral HPLC analysis.

## 8. Procedure for Scheme 3

[IrCl(coe)<sub>2</sub>]<sub>2</sub> (4.5 mg, 0.0050 mmol, 5 mol% of Ir) and (*R*)-**L3** (8.0 mg, 0.012 mmol, 6 mol%) were placed in a Schlenk tube under N<sub>2</sub>. Toluene (0.8 mL) was added to the tube, and the resulting mixture was stirred at room temperature for 15 min. To the resulting red solution were added *o*-benzoylphenyl pinacol boron ester **6a–6n** (0.20 mmol), Et<sub>3</sub>N (28 μL, 0.20 mmol, 1.0 equiv), H<sub>2</sub>O (0.8 mL), and isoprene **2a** (40.9 mg, 0.60 mmol, 3.0 equiv). The Schlenk tube was capped with a glass stopper and stirred at 80 °C for 24 h. The resulting mixture was extracted with Et<sub>2</sub>O, dried over MgSO<sub>4</sub>, filtered, concentrated on a rotary evaporator. The residue was subjected to preparative TLC on silica gel eluted with EtOAc/hexane (1:4) to give **3aa–3ma**.

## 9. Procedure for Scheme 4

[IrCl(coe)<sub>2</sub>]<sub>2</sub> (4.5 mg, 0.0050 mmol, 5 mol% of Ir) and (*R*)-**L3** (8.0 mg, 0.012 mmol, 6 mol%) were placed in a Schlenk tube under N<sub>2</sub>. Toluene (0.8 mL) was added to the tube, and the resulting mixture was stirred at room temperature for 15 min. To the resulting red solution were added *o*-benzoylphenyl pinacol boron ester **6g** (61.6 mg, 0.20 mmol), Et<sub>3</sub>N (28 μL, 0.20 mmol, 1.0 equiv), H<sub>2</sub>O (0.8 mL), and 1,3-dienes **2b–2f** (0.60 mmol, 3.0 equiv). The Schlenk tube was capped with a glass stopper and stirred at 80 °C for 24 h or 48 h. The resulting mixture was extracted with Et<sub>2</sub>O, dried over MgSO<sub>4</sub>, filtered, concentrated on a rotary evaporator. The residue was subjected to preparative TLC on silica gel eluted with EtOAc/hexane (1:4) to give **3gb–3gf**.

## 10. Other Experimental Data

Table S-1. Ligand screening<sup>a</sup>

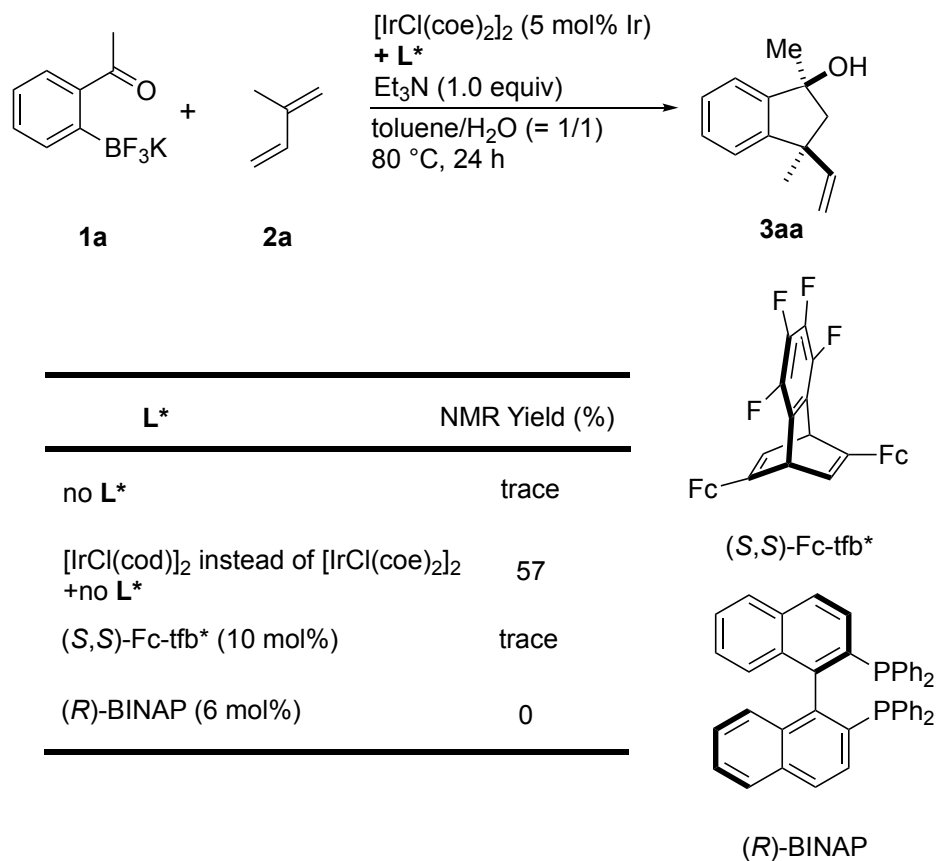

<sup>a</sup>Reaction conditions: **1a** (0.10 mmol), **2a** (0.30 mmol, 3.0 equiv), [IrCl(coe)<sub>2</sub>]<sub>2</sub> (0.0025 mmol, 5 mol% of Ir), (*rac*)-**L1** (0.006 mmol, 6 mol%), and Et<sub>3</sub>N (0.10 mmol, 1.0 equiv) in toluene (0.4 mL) and H<sub>2</sub>O (0.4 mL) at 80 °C for 24 h under N<sub>2</sub> atmosphere. Ratio of diastereomers (dr >99:1).

**Table S-2.** Screening of base<sup>a</sup>

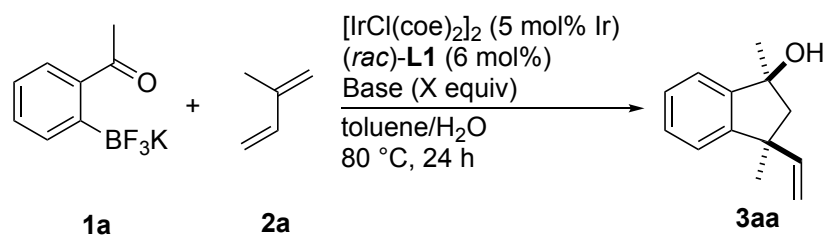

| Base              | X     | Yield (%) <sup>b</sup> | Dr (Cis/Trans) <sup>b</sup> |
|-------------------|-------|------------------------|-----------------------------|
|                   | 1.0   | 68                     | >99/1                       |
| Et <sub>3</sub> N | 0.5   | 58                     | >99/1                       |
|                   | 1.3   | 58                     | >99/1                       |
|                   | 2.5   | 54                     | >99/1                       |
|                   | ----- |                        |                             |
| DABCO             | 1.0   | 29                     | >99/1                       |
| Pyridine          | 1.0   | 7                      | >99/1                       |
| KOAc              | 1.0   | 41                     | 86/14                       |
| None              | -     | 45                     | 73/27                       |

<sup>a</sup>Reaction conditions: **1a** (0.20 mmol), **2a** (0.60 mmol, 3.0 equiv), [IrCl(coe)<sub>2</sub>]<sub>2</sub> (0.0050 mmol, 5 mol% of Ir), (*rac*)-**L1** (0.012 mmol, 6 mol%) and base in toluene (0.8 mL) and H<sub>2</sub>O (0.8 mL) at 80 °C for 24 h under N<sub>2</sub> atmosphere. <sup>b</sup>Determined by <sup>1</sup>H NMR.

## 11. Characterization of the products

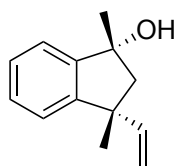

**3aa**

**Compound 3aa** (19.8 mg, 53% yield, 99% ee, colorless oil): The ee was measured by HPLC (CHIRALCEL<sup>®</sup> OD-H, hexane/2-propanol = 100:1, flow 1.0 mL/min, 254 nm,  $t_1 = 16.9$  min (minor),  $t_2 = 20.2$  min (major));  $[\alpha]_D^{25} +13$  ( $c$  0.68, CHCl<sub>3</sub>) for 99% ee; <sup>1</sup>H NMR (400 MHz, CDCl<sub>3</sub>)  $\delta$  7.40–7.29 (m, 3H), 7.18 (dd,  $J = 8.0, 1.6$  Hz, 1H), 6.19 (dd,  $J = 17.4, 10.6$  Hz, 1H), 4.97 (dd,  $J = 10.6, 1.4$  Hz, 1H), 4.78 (dd,  $J = 17.4, 1.4$  Hz, 1H), 2.38 (d,  $J = 13.6$  Hz, 1H), 2.12 (d,  $J = 13.6$  Hz, 1H), 2.02 (br, 1H), 1.63 (s, 3H), 1.41 (s, 3H); <sup>13</sup>C NMR (100 MHz, CDCl<sub>3</sub>)  $\delta$  148.8, 147.8, 147.3, 128.6, 127.6, 124.1, 122.7, 111.8, 79.5, 56.0, 48.4, 27.3, 26.4; HRMS (ESI)  $m/z$ :  $[M + Na]^+$  Calcd for C<sub>13</sub>H<sub>16</sub>ONa 211.1093; Found 211.1092.

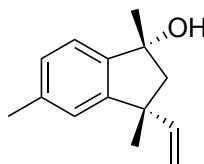

**3ba**

**Compound 3ba** (25.4 mg, 63% yield, 99% ee, colorless oil): The ee was measured by HPLC (CHIRALPAK<sup>®</sup> IA, hexane/2-propanol = 100:1, flow 1.0 mL/min, 254 nm,  $t_1 = 22.0$  min (minor),  $t_2 = 27.7$  min (major));  $[\alpha]_D^{25} +28$  ( $c$  1.27, CHCl<sub>3</sub>) for 99% ee; <sup>1</sup>H NMR (400 MHz, CDCl<sub>3</sub>)  $\delta$  7.27 (d,  $J = 7.8$  Hz, 1H), 7.12 (d,  $J = 7.8$  Hz, 1H), 6.98 (s, 1H), 6.18 (dd,  $J = 17.4, 10.6$  Hz, 1H), 4.97 (dd,  $J = 10.6, 1.2$  Hz, 1H), 4.81 (dd,  $J = 17.4, 1.2$  Hz, 1H), 2.38–2.35 (m, 4H), 2.11 (d,  $J = 14.0$  Hz, 1H), 1.98 (br, 1H), 1.62 (s, 3H), 1.40 (s, 3H); <sup>13</sup>C NMR (100 MHz, CDCl<sub>3</sub>)  $\delta$  148.8, 148.0, 144.6, 128.5, 124.6, 122.5, 111.6, 79.3, 56.2, 48.3, 27.4, 26.3, 21.5; HRMS (ESI)  $m/z$ :  $[M + Na]^+$  Calcd for C<sub>14</sub>H<sub>18</sub>NaO 225.1250; Found 225.1254.



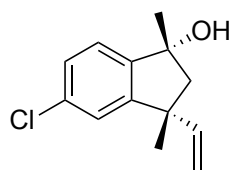

**3ca**

**Compound 3ca** (33.2 mg, 75% yield, 99% ee, colorless oil): The ee was measured by HPLC (CHIRALPAK<sup>®</sup> IA, hexane/2-propanol = 100:1, flow 1.0 mL/min, 254 nm,  $t_1$  = 23.7 min (minor),  $t_2$  = 27.3 min (major));  $[\alpha]^{25}_D$  +33 ( $c$  1.66, CHCl<sub>3</sub>) for 99% ee; <sup>1</sup>H NMR (400 MHz, CDCl<sub>3</sub>)  $\delta$  7.31–7.25 (m, 2H), 7.18 (d,  $J$  = 2.0 Hz, 1H), 6.14 (dd,  $J$  = 17.2, 10.4 Hz, 1H), 5.00 (dd,  $J$  = 10.4, 1.0 Hz, 1H), 4.80 (dd,  $J$  = 17.2, 1.0 Hz, 1H), 2.37 (d,  $J$  = 13.8 Hz, 1H), 2.12 (d,  $J$  = 13.8 Hz, 1H), 2.04 (br, 1H), 1.60 (s, 3H), 1.39 (s, 3H); <sup>13</sup>C NMR (100 MHz, CDCl<sub>3</sub>)  $\delta$  149.8, 148.0, 145.9, 134.4, 127.9, 124.4, 124.1, 112.2, 79.1, 56.0, 48.4, 27.4, 26.2; HRMS (ESI)  $m/z$ :  $[M + Na]^+$  Calcd for C<sub>13</sub>H<sub>15</sub><sup>35</sup>ClNaO 245.0704; Found 245.0701.

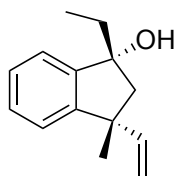

**3da**

**Compound 3da** (30.7 mg, 76% yield, 99% ee, colorless oil): The ee was measured by HPLC (CHIRALCEL<sup>®</sup> OD-H, hexane/2-propanol = 100:1, flow 0.6 mL/min, 254 nm,  $t_1$  = 23.3 min (minor),  $t_2$  = 26.6 min (major));  $[\alpha]^{25}_D$  +37 ( $c$  0.41, CHCl<sub>3</sub>) for 99% ee; <sup>1</sup>H NMR (400 MHz, CDCl<sub>3</sub>)  $\delta$  7.36–7.27 (m, 3H), 7.19–7.17 (m, 1H), 6.20 (dd,  $J$  = 17.2, 10.4 Hz, 1H), 4.96 (dd,  $J$  = 10.4, 1.4 Hz, 1H), 4.76 (dd,  $J$  = 17.2, 1.4 Hz, 1H), 2.26 (d,  $J$  = 13.8 Hz, 1H), 2.14 (d,  $J$  = 13.8 Hz, 1H), 2.10 (dt,  $J$  = 21.4, 7.4 Hz, 1H), 1.94 (s, 1H), 1.78 (dt,  $J$  = 21.4, 7.4 Hz, 1H), 1.42 (s, 3H), 1.01 (t,  $J$  = 7.4 Hz, 3H); <sup>13</sup>C {<sup>1</sup>H} NMR (100 MHz, CDCl<sub>3</sub>)  $\delta$  149.0, 148.3, 146.7, 128.7, 127.5, 124.2, 123.0, 111.5, 82.5, 52.5, 48.3, 32.5, 26.4, 8.8; HRMS (ESI)  $m/z$ :  $[M + Na]^+$  Calcd for C<sub>14</sub>H<sub>18</sub>ONa 225.1250; Found 225.1261.

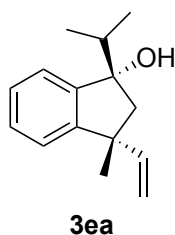

**Compound 3ea** (23.8 mg, 55% yield, 99% ee, colorless oil): The ee was measured by HPLC (CHIRALCEL<sup>®</sup> OD-H, hexane/2-propanol = 100:1, flow 0.6 mL/min, 254 nm,  $t_1 = 19.1$  min (minor),  $t_2 = 23.4$  min (major));  $[\alpha]^{25}_D +52$  ( $c$  0.71, CHCl<sub>3</sub>) for 99% ee; <sup>1</sup>H NMR (400 MHz, CDCl<sub>3</sub>)  $\delta$  7.35–7.27 (m, 3H), 7.18–7.16 (m, 1H), 6.20 (dd,  $J = 17.2, 10.4$  Hz, 1H), 4.93 (dd,  $J = 10.4, 1.2$  Hz, 1H), 4.73 (dd,  $J = 17.2, 1.2$  Hz, 1H), 2.38 (m, 1H), 2.14 (d,  $J = 14.2$  Hz, 1H), 2.09 (d,  $J = 14.2$  Hz, 1H), 1.92 (s, 1H), 1.42 (s, 3H), 1.13 (d,  $J = 6.6$  Hz, 3H), 0.75 (d,  $J = 6.6$  Hz, 3H); <sup>13</sup>C{<sup>1</sup>H} NMR (100 MHz, CDCl<sub>3</sub>)  $\delta$  149.0, 148.3, 146.7, 128.7, 127.5, 123.2, 123.0, 111.5, 82.5, 52.5, 48.3, 32.5, 26.4, 8.75; HRMS (ESI)  $m/z$ :  $[M + Na]^+$  Calcd for C<sub>13</sub>H<sub>20</sub>O<sub>3</sub>Na 239.1406; Found 239.1412.

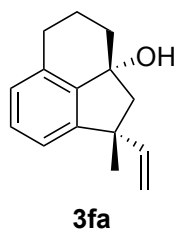

**Compound 3fa** (30.8 mg, 72% yield, 95% ee, colorless oil): The ee was measured by HPLC (CHIRALCEL<sup>®</sup> OD-H, hexane/2-propanol = 100:1, flow 0.5 mL/min, 254 nm,  $t_1 = 17.0$  min (minor),  $t_2 = 19.0$  min (major));  $[\alpha]^{25}_D +11$  ( $c$  0.67, CHCl<sub>3</sub>) for 95% ee; <sup>1</sup>H NMR (400 MHz, CDCl<sub>3</sub>)  $\delta$  7.29–7.25 (m, 1H), 7.04–7.02 (m, 2H), 6.38 (dd,  $J = 17.4, 10.2$  Hz, 1H), 5.02 (dd,  $J = 10.2, 1.2$  Hz, 1H), 4.84 (dd,  $J = 17.4, 1.2$  Hz, 1H), 2.93–2.87 (m, 1H), 2.69–2.60 (m, 1H), 2.43 (d,  $J = 13.0$  Hz, 1H), 2.32–2.16 (m, 3H), 1.94 (d,  $J = 13.0$  Hz, 1H), 1.91–1.84 (m, 1H), 1.49–1.38 (m, 4H); <sup>13</sup>C{<sup>1</sup>H} NMR (100 MHz, CDCl<sub>3</sub>)  $\delta$  149.4, 146.8, 143.6, 135.0, 129.0, 126.6, 121.5, 112.7, 76.1, 56.4, 49.8, 34.2, 26.7, 25.9, 18.6; HRMS (ESI)  $m/z$ :  $[M + Na]^+$  Calcd for C<sub>14</sub>H<sub>16</sub>ONa 237.1257; Found 237.1250.

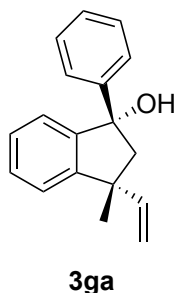

**Compound 3ga** (42.5 mg, 85% yield, 99% ee, colorless oil): The ee was measured by HPLC (CHIRALPAK<sup>®</sup> IA, hexane/2-propanol = 100:1, flow 1.0 mL/min, 254 nm, the minor product peak was not detected due to quite high enantioselectivity,  $t_r = 34.7$  min (major));  $[\alpha]_D^{25} +50$  ( $c$  0.66, CHCl<sub>3</sub>) for 99% ee; <sup>1</sup>H NMR (400 MHz, CDCl<sub>3</sub>)  $\delta$  7.45–7.26 (m, 8H), 7.06 (dd,  $J = 7.0, 1.4$  Hz, 1H), 6.30 (dd,  $J = 17.4, 10.4$  Hz, 1H), 5.03 (dd,  $J = 10.4, 0.6$  Hz, 1H), 4.84 (dd,  $J = 17.4, 0.6$  Hz, 1H), 2.62 (d,  $J = 14.2$  Hz, 1H), 2.43 (d,  $J = 14.2$  Hz, 1H), 2.35 (s, 1H), 1.46 (s, 3H); <sup>13</sup>C {<sup>1</sup>H} NMR (100 MHz, CDCl<sub>3</sub>)  $\delta$  148.8, 148.7, 147.5, 146.1, 128.8, 127.9, 127.8, 126.8, 126.0, 124.8, 124.1, 111.9, 84.1, 58.9, 49.0, 26.3; HRMS (ESI)  $m/z$ :  $[M + Na]^+$  Calcd for C<sub>18</sub>H<sub>18</sub>ONa 273.1250; Found 273.1249.

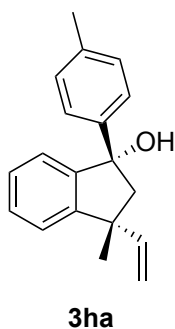

**Compound 3ha** (37.0 mg, 70% yield, 99% ee, colorless oil): The ee was measured by HPLC (CHIRALCEL<sup>®</sup> OD-H, hexane/2-propanol = 100:1, flow 0.6 mL/min, 254 nm,  $t_1 = 28.3$  min (minor),  $t_2 = 31.3$  min (major));  $[\alpha]_D^{25} +25$  ( $c$  0.87, CHCl<sub>3</sub>) for 99% ee; <sup>1</sup>H NMR (400 MHz, CDCl<sub>3</sub>)  $\delta$  7.41–7.26 (m, 5H), 7.17 (d,  $J = 8.0$  Hz, 2H), 7.08 (d,  $J = 7.2$  Hz, 1H), 6.29 (dd,  $J = 17.6, 10.4$  Hz, 1H), 5.03 (dd,  $J = 10.4, 1.2$  Hz, 1H), 4.85 (dd,  $J = 17.6, 1.2$  Hz, 1H), 2.61 (d,  $J = 13.8$  Hz, 1H), 2.45 (d,  $J = 13.8$  Hz, 1H), 2.37 (s, 3H), 2.34 (s, 1H), 1.45 (s, 3H); <sup>13</sup>C {<sup>1</sup>H} NMR (100 MHz, CDCl<sub>3</sub>)  $\delta$  148.8, 148.6, 147.6, 143.2,

136.4, 128.7, 128.6, 127.8, 125.9, 124.8, 124.1, 111.8, 84.0, 58.9, 48.9, 26.2, 21.0. HRMS (ESI)  $m/z$ :  $[M + Na]^+$  Calcd for  $C_{19}H_{20}ONa$  287.1399; Found 287.1406.

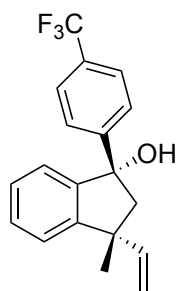

**3ia**

**Compound 3ia** (54.1 mg, 85% yield, 95% ee, colorless oil): The ee was measured by HPLC (CHIRALPAK<sup>®</sup> IK, hexane/2-propanol = 100:1, flow 0.6 mL/min, 254 nm,  $t_1$  = 8.9 min (minor),  $t_2$  = 10.1 min (major));  $[\alpha]_D^{25} +35$  ( $c$  2.14,  $CHCl_3$ ) for 95% ee;  $^1H$  NMR (400 MHz,  $CDCl_3$ )  $\delta$  7.59 (d,  $J$  = 8.4 Hz, 2H), 7.55 (d,  $J$  = 8.4 Hz, 2H), 7.40 (t,  $J$  = 8.0 Hz, 1H), 7.30–7.25 (m, 2H), 6.99 (dd,  $J$  = 7.0, 1.8 Hz, 1H), 6.29 (dd,  $J$  = 17.2, 10.4 Hz, 1H), 5.03 (dd,  $J$  = 10.4, 1.2 Hz, 1H), 4.80 (dd,  $J$  = 17.2, 1.2 Hz, 1H), 2.61 (d,  $J$  = 13.8 Hz, 1H), 2.43 (s, 1H), 2.38 (d,  $J$  = 13.8 Hz, 1H), 1.48 (s, 3H);  $^{13}C$   $\{^1H\}$  NMR (100 MHz,  $CD_3COCD_3$ )  $\delta$  154.0, 150.9, 148.3, 147.9, 147.8, 129.6, 128.9 (q,  $^2J_{F-C}$  = 32 Hz), 128.3, 127.8, 125.6, 125.47 (q,  $^3J_{F-C}$  = 4 Hz), 125.46 (q,  $^1J_{F-C}$  = 269 Hz), 110.7, 84.2, 59.6, 49.4, 26.1; HRMS (ESI)  $m/z$ :  $[M + Na]^+$  Calcd for  $C_{19}H_{17}OF_3Na$  341.1124; Found 341.1130.

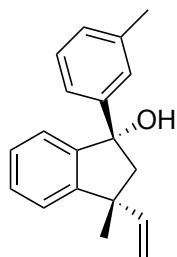

**3ja**

**Compound 3ja** (32.2 mg, 61% yield, 98% ee, colorless oil): The ee was measured by HPLC (CHIRALPAK<sup>®</sup> IK, hexane/2-propanol = 100:1, flow 0.6 mL/min,

254 nm,  $t_1 = 11.4$  min (major),  $t_2 = 12.0$  min (minor));  $[\alpha]^{25}_D +37$  ( $c$  0.97,  $\text{CHCl}_3$ ) for 98% ee;  $^1\text{H}$  NMR (400 MHz,  $\text{CDCl}_3$ )  $\delta$  7.40 (td,  $J = 7.2, 1.6$  Hz, 1H), 7.31–7.20 (m, 5H), 7.12–7.08 (m, 2H), 6.31 (dd,  $J = 17.2, 11.0$  Hz, 1H), 5.04 (dd,  $J = 11.0, 1.2$  Hz, 1H), 4.86 (dd,  $J = 17.2, 1.2$  Hz, 1H), 2.62 (d,  $J = 13.8$  Hz, 1H), 2.44 (d,  $J = 13.8$  Hz, 1H), 2.373 (s, 3H), 2.367 (s, 1H), 1.47 (s, 3H);  $^{13}\text{C}\{^1\text{H}\}$  NMR (100 MHz,  $\text{CDCl}_3$ )  $\delta$  148.8, 148.7, 147.6, 146.0, 137.5, 128.8, 127.84, 127.82, 127.6, 126.6, 124.8, 124.1, 123.1, 111.8, 84.1, 58.9, 49.0, 26.3, 21.61; HRMS (ESI)  $m/z$ :  $[\text{M} + \text{Na}]^+$  Calcd for  $\text{C}_{19}\text{H}_{20}\text{ONa}$  241.1406; Found 287.1407.

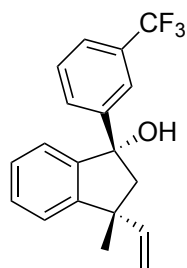

**3ka**

**Compound 3ka** (49.3 mg, 77% yield, 99% ee, colorless oil): The ee was measured by HPLC (CHIRALPAK<sup>®</sup> IA, hexane/2-propanol = 100:1, flow 1.0 mL/min, 254 nm,  $t_1 = 23.1$  min (major),  $t_2 = 25.0$  min (minor));  $[\alpha]^{25}_D +38$  ( $c$  1.62,  $\text{CHCl}_3$ ) for 99% ee;  $^1\text{H}$  NMR (400 MHz,  $\text{CDCl}_3$ )  $\delta$  7.81 (s, 1H), 7.55 (t,  $J = 7.2$  Hz, 2H), 7.47–7.40 (m, 2H), 7.31–7.26 (m, 2H), 7.01 (d,  $J = 7.2$  Hz, 1H), 6.30 (dd,  $J = 17.4, 10.2$  Hz, 1H), 5.04 (d,  $J = 10.2$  Hz, 1H), 4.83 (d,  $J = 17.4$  Hz, 1H), 2.63 (d,  $J = 13.8$  Hz, 1H), 2.45 (s, 1H), 2.39 (d,  $J = 13.8$  Hz, 1H), 1.49 (s, 3H);  $^{13}\text{C}\{^1\text{H}\}$  NMR (100 MHz,  $\text{CDCl}_3$ )  $\delta$  148.7, 147.1, 147.0, 130.3 (q,  $^2J_{\text{F-C}} = 32$  Hz), 129.6, 129.2, 128.4, 128.1, 125.6, 124.6, 124.3, 123.9 (q,  $^1J_{\text{F-C}} = 249$  Hz), 123.7 (q,  $^3J_{\text{F-C}} = 4$  Hz), 122.8 (q,  $^3J_{\text{F-C}} = 4$  Hz), 112.3, 83.8, 58.9, 49.2, 26.4; HRMS (ESI)  $m/z$ :  $[\text{M} + \text{Na}]^+$  Calcd for  $\text{C}_{19}\text{H}_{17}\text{OF}_3\text{Na}$  341.1124; Found 341.1135.

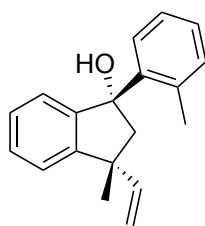

**3la**

**Compound 3la** (29.4 mg, 56% yield, 98% ee, colorless oil): The ee was measured by HPLC (CHIRALCEL<sup>®</sup> OD-H, hexane/2-propanol = 100:1, flow 0.6 mL/min, 254 nm,  $t_1 = 27.1$  min (major),  $t_2 = 31.1$  min (minor));  $[\alpha]^{25}_D +33$  ( $c$  0.85, CHCl<sub>3</sub>) for 98% ee; <sup>1</sup>H NMR (400 MHz, CDCl<sub>3</sub>)  $\delta$  7.53 (d,  $J = 7.6$  Hz, 1H), 7.39 (t,  $J = 7.6, 1.2$  Hz, 1H), 7.31–7.25 (m, 2H), 7.22–7.15 (m, 3H), 7.12 (d,  $J = 7.6$  Hz, 1H), 6.25 (dd,  $J = 17.4, 10.5$  Hz, 1H), 5.03 (dd,  $J = 10.5, 1.2$  Hz, 1H), 4.83 (dd,  $J = 17.4, 1.2$  Hz, 1H), 2.58 (m, 2H), 2.23 (s, 1H), 2.12 (s, 3H), 1.39 (s, 3H); <sup>13</sup>C {<sup>1</sup>H} NMR (100 MHz, CDCl<sub>3</sub>)  $\delta$  148.5, 148.4, 147.4, 143.2, 135.5, 132.1, 128.8, 127.8, 127.2, 126.8, 125.3, 124.4, 124.3, 111.5, 84.5, 55.9, 48.8, 25.8, 21.6; HRMS (ESI)  $m/z$ :  $[M + Na]^+$  Calcd for C<sub>19</sub>H<sub>20</sub>ONa 287.1406; Found 247.1412.

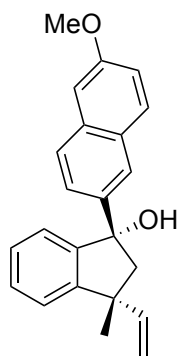

**3ma**

**Compound 3ma** (47.6 mg, 72% yield, 99% ee, colorless oil): The ee was measured by HPLC (CHIRALPAK<sup>®</sup> IC, hexane/2-propanol = 100:1, flow 1.0 mL/min, 254 nm,  $t_1 = 20.7$  min (major),  $t_2 = 23.2$  min (minor));  $[\alpha]^{25}_D -6.6$  ( $c$  2.12, CHCl<sub>3</sub>) for 99% ee; <sup>1</sup>H NMR (400 MHz, CDCl<sub>3</sub>)  $\delta$  7.94 (d,  $J = 2.0$  Hz, 1H), 7.74 (d,  $J = 8.6$  Hz, 1H), 7.70 (d,  $J = 8.6$  Hz, 1H), 7.43–7.37 (m, 2H), 7.31–7.27 (m, 2H), 7.17–7.15 (m, 2H), 7.08 (d, 7.6 Hz, 1H), 6.33 (dd,  $J = 17.4, 10.6$  Hz, 1H), 5.05 (dd,  $J = 10.6, 1.2$  Hz, 1H), 4.89

(dd,  $J = 17.4, 1.2$  Hz, 1H), 3.93 (s, 3H), 2.67 (d,  $J = 14.0$  Hz, 1H), 2.53 (d,  $J = 14.0$  Hz, 1H), 2.48 (s, 1H), 1.48 (s, 3H);  $^{13}\text{C}\{^1\text{H}\}$  NMR (100 MHz,  $\text{CDCl}_3$ )  $\delta$  157.7, 148.9, 148.7, 147.5, 141.1, 133.5, 129.7, 128.9, 128.4, 127.9, 126.6, 125.2, 124.8, 124.3, 124.2, 118.8, 111.8, 105.5, 84.2, 58.7, 55.3, 49.0, 26.3; HRMS (ESI)  $m/z$ :  $[\text{M} + \text{Na}]^+$  Calcd for  $\text{C}_{23}\text{H}_{22}\text{ONa}$  353.1512; Found 353.1515.

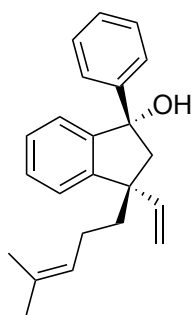

**3gb**

**Compound 3gb** (52.8 mg, 83% yield, 99% ee, colorless oil): The ee was measured by HPLC (CHIRALPAK<sup>®</sup> IA, hexane/2-propanol = 100:1, flow 0.6 mL/min, 254 nm,  $t_1 = 21.3$  min (major),  $t_2 = 24.7$  min (minor));  $[\alpha]_D^{25} +42$  ( $c$  2.29,  $\text{CHCl}_3$ ) for 99% ee;  $^1\text{H}$  NMR (400 MHz,  $\text{CDCl}_3$ )  $\delta$  7.45–7.42 (m, 2H), 7.39–7.33 (m, 3H), 7.30–7.25 (m, 3H), 7.04 (d,  $J = 7.6$  Hz, 1H), 6.30 (dd,  $J = 17.2, 10.4$  Hz, 1H), 5.11–5.07 (m, 2H), 4.94 (dd,  $J = 17.2, 1.0$  Hz, 1H), 2.60 (d,  $J = 14.2$  Hz, 1H), 2.51 (d,  $J = 14.2$  Hz, 1H), 2.33 (s, 1H), 2.08–1.68 (m, 4H), 1.67 (s, 3H), 1.55 (s, 3H);  $^{13}\text{C}\{^1\text{H}\}$  NMR (100 MHz,  $\text{CDCl}_3$ )  $\delta$  148.0, 147.8, 147.3, 146.1, 131.8, 128.8, 127.9, 126.8, 126.1, 126.0, 125.0, 124.2, 124.1, 112.8, 84.0, 54.8, 52.8, 39.6, 25.7, 23.5, 17.6; HRMS (ESI)  $m/z$ :  $[\text{M} + \text{Na}]^+$  Calcd for  $\text{C}_{23}\text{H}_{26}\text{ONa}$  341.1876; Found 341.1875.

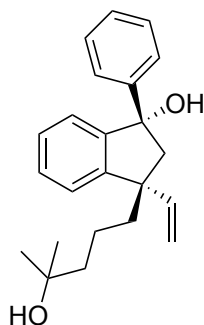

**3gc**

**Compound 3gc** (37.1 mg, 58% yield, 99% ee, colorless oil): The ee was measured by HPLC (CHIRALPAK<sup>®</sup> IH, hexane/2-propanol = 19:1, flow 0.6 mL/min, 254 nm,  $t_1$  = 22.2 min (minor),  $t_2$  = 27.7 min (major));  $[\alpha]_D^{20}$  +556 ( $c$  0.10, CHCl<sub>3</sub>) for 99% ee; <sup>1</sup>H NMR (400 MHz, CDCl<sub>3</sub>)  $\delta$  7.46–7.25 (m, 8H), 7.05 (dd,  $J$  = 7.6, 1.4 Hz, 1H), 6.29 (dd,  $J$  = 17.2, 10.4 Hz, 1H), 5.08 (dd,  $J$  = 10.4, 1.2 Hz, 1H), 4.91 (dd,  $J$  = 17.2, 1.2 Hz, 1H), 2.61 (d,  $J$  = 13.8 Hz, 1H), 2.47 (d,  $J$  = 13.8 Hz, 1H), 2.35 (s, 1H), 2.17 (br, 1H), 1.94–1.87 (m, 1H), 1.69–1.62 (m, 2H), 1.51–1.42 (m, 2H), 1.34–1.17 (m, 7H); <sup>13</sup>C{<sup>1</sup>H} NMR (100 MHz, CDCl<sub>3</sub>)  $\delta$  148.2, 147.6, 147.2, 146.1, 128.8, 127.9, 126.8, 126.0, 125.0, 124.2, 113.0, 83.94, 70.9, 55.1, 52.8, 44.4, 40.4, 29.3, 19.5; HRMS (ESI)  $m/z$ : [M + Na]<sup>+</sup> Calcd for C<sub>23</sub>H<sub>28</sub>O<sub>2</sub>Na 359.1982; Found 359.1982.

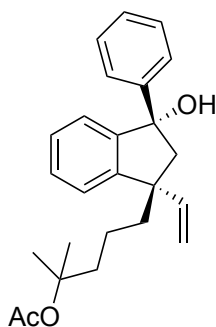

**3gd**

**Compound 3gd** (45.9 mg, 63% yield, 99% ee, colorless oil): The ee was measured by HPLC (CHIRALPAK<sup>®</sup> IK, hexane/2-propanol = 100:1, flow 0.6 mL/min, 254 nm,  $t_1$  = 30.6 min (minor),  $t_2$  = 32.6 min (major));  $[\alpha]_D^{25}$  +51 ( $c$  1.20, CHCl<sub>3</sub>) for 99% ee; <sup>1</sup>H NMR (400 MHz, CDCl<sub>3</sub>)  $\delta$  7.45 (d,  $J$  = 7.8 Hz, 2H), 7.40–7.34 (m, 3H), 7.30–7.25 (m, 3H), 7.04 (d,  $J$  = 7.8 Hz, 1H), 6.28 (dd,  $J$  = 17.4, 10.4 Hz, 1H), 5.08 (d,  $J$  = 10.4 Hz,



1H), 4.92 (d,  $J = 17.4$  Hz, 1H), 2.61 (d,  $J = 13.6$  Hz, 1H), 2.45 (d,  $J = 13.6$  Hz, 1H), 2.36 (s, 1H), 1.92 (s, 3H), 1.90–1.86 (m, 1H), 1.79–1.62 (m, 3H), 1.43–1.42 (m, 1H), 1.39 (s, 3H), 1.38 (s, 3H), 1.27–1.20 (m, 1H);  $^{13}\text{C}\{^1\text{H}\}$  NMR (100 MHz,  $\text{CDCl}_3$ )  $\delta$  170.4, 148.2, 147.7, 147.1, 146.1, 128.8, 127.9, 126.8, 125.9, 125.0, 124.1, 112.9, 83.9, 82.2, 55.0, 52.8, 41.1, 39.9, 26.04, 25.99, 22.4, 19.0; HRMS (ESI)  $m/z$ :  $[\text{M} + \text{Na}]^+$  Calcd for  $\text{C}_{25}\text{H}_{30}\text{O}_3\text{Na}$  401.2087; Found 401.2093.

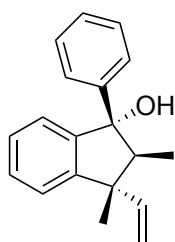

**3ge**

**Compound 3ge** (15.5 mg, 29% yield, 99% ee, colorless oil): The ee was measured by HPLC (CHIRALPAK<sup>®</sup> IK, hexane/2-propanol = 100:1, flow 0.6 mL/min, 254 nm,  $t_1 = 7.8$  min (minor),  $t_2 = 8.2$  min (major));  $[\alpha]^{25}_{\text{D}} +58$  ( $c$  0.52,  $\text{CHCl}_3$ ) for 99% ee;  $^1\text{H}$  NMR (400 MHz,  $\text{CDCl}_3$ )  $\delta$  7.43–7.40 (m, 2H), 7.38–7.32 (m, 3H), 7.30–7.24 (m, 3H), 7.05 (d,  $J = 8.0$  Hz, 1H), 6.24 (dd,  $J = 17.4, 10.4$  Hz, 1H), 5.06 (dd,  $J = 10.4, 1.4$  Hz, 1H), 4.64 (dd,  $J = 17.4, 1.4$  Hz, 1H), 2.33 (q,  $J = 7.0$  Hz, 1H), 2.01 (s, 1H), 1.48 (s, 3H), 1.00 (d,  $J = 7.0$  Hz, 3H);  $^{13}\text{C}\{^1\text{H}\}$  NMR (100 MHz,  $\text{CDCl}_3$ )  $\delta$  148.8, 148.1, 146.6, 144.8, 128.6, 127.7, 126.7, 126.4, 125.0, 124.4, 113.8, 84.9, 59.5, 51.4, 24.0, 6.8; HRMS (ESI)  $m/z$ :  $[\text{M} + \text{Na}]^+$  Calcd for  $\text{C}_{19}\text{H}_{20}\text{ONa}$  287.1406; Found 287.1406.

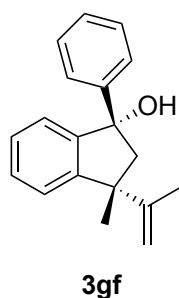

**Compound 3gf** (17.2 mg, 33% yield, 97% ee, colorless oil): The ee was measured by HPLC (CHIRALPAK<sup>®</sup> ID, hexane/2-propanol = 100:1, flow 0.6 mL/min, 254 nm,  $t_1 = 30.4$  min (major),  $t_2 = 36.0$  min (minor));  $[\alpha]^{25}_D +23$  ( $c$  0.54,  $\text{CHCl}_3$ ) for 97% ee;  $^1\text{H NMR}$  (400 MHz,  $\text{CDCl}_3$ )  $\delta$  7.33 (d,  $J = 8.0$  Hz, 2H), 7.39–7.32 (m, 3H), 7.28–7.24 (m, 3H), 7.04 (d,  $J = 7.2$  Hz, 1H), 4.85 (s, 1H), 4.42 (s, 1H), 2.74 (d,  $J = 13.6$  Hz, 1H), 2.59 (s, 1H), 2.34 (d,  $J = 13.6$  Hz, 1H), 1.92 (s, 3H), 1.50 (s, 3H);  $^{13}\text{C}\{^1\text{H}\}$  NMR (100 MHz,  $\text{CDCl}_3$ )  $\delta$  154.5, 149.6, 147.4, 146.0, 128.6, 127.9, 127.8, 126.7, 125.9, 124.9, 124.4, 112.1, 84.0, 57.7, 51.7, 26.0, 20.2; HRMS (ESI)  $m/z$ :  $[\text{M} + \text{Na}]^+$  Calcd for  $\text{C}_{19}\text{H}_{20}\text{ONa}$  287.14106; Found 287.1409.

## 12. Transformation of 3ga (Scheme 5)

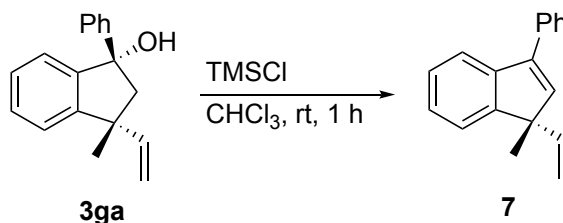

To a solution of **3ga** (6.1 mg, 0.024 mmol) in  $\text{CHCl}_3$  (0.12 mL) was added trimethylsilyl chloride (TMSCl, 24.2 mg, 0.22 mmol), and the mixture was stirred at room temperature for an hour. The mixture was concentrated on a rotary evaporator, and the residue was subjected to preparative TLC on silica gel eluted with EtOAc/hexane (1:10) to give **7**. **Compound 7** (5.0 mg, 88% yield, 99% ee, colorless oil): The ee was measured by HPLC (CHIRALPAK<sup>®</sup> IA, hexane, flow 1.0 mL/min, 254 nm,  $t_1 = 35.6$  min (minor),  $t_2 = 36.9$  min (major));  $[\alpha]^{25}_D +60$  ( $c$  0.32,  $\text{CHCl}_3$ ) for 99% ee;  $^1\text{H NMR}$  (400 MHz,  $\text{CDCl}_3$ )  $\delta$  7.61 (d,  $J = 7.6$  Hz, 2H), 7.52 (d,  $J = 7.6$  Hz, 1H), 7.45 (t,  $J = 8.0$  Hz, 2H), 7.39–7.24 (m, 4H), 6.39 (s, 1H), 5.84 (dd,  $J = 17.0, 10.4$  Hz, 1H), 5.28 (d,  $J = 17.0$  Hz, 1H), 5.06 (d,  $J = 10.4$  Hz, 1H), 1.50 (s, 3H);  $^{13}\text{C}\{^1\text{H}\}$  NMR (100 MHz,  $\text{CDCl}_3$ )  $\delta$  151.9, 142.4,

142.1, 140.89, 140.85, 135.6, 128.5, 127.7, 126.7, 125.6, 122.8, 120.8, 112.4, 54.6, 21.1;  
HRMS (DART)  $m/z$ :  $[M + H]^+$  Calcd for  $C_{18}H_{17}$  233.1325; Found 233.1328.

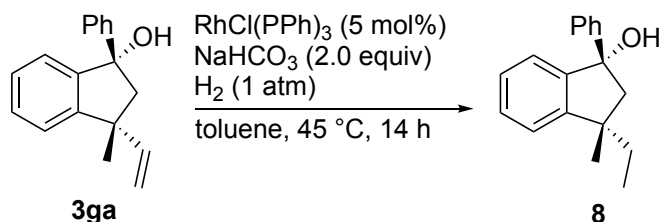

$RhCl(PPh_3)_3$  (4.6 mg, 0.0050 mmol, 5 mol%) and  $NaHCO_3$  (17.0 mg, 0.20 mmol, 2.0 equiv) were placed in a Schlenk tube under  $H_2$ . Toluene (1.0 mL) and alcohol **3ga** (26.6 mg, 0.11 mmol) were added to the tube, and the resulting mixture was stirred at 45 °C for 14 h. The mixture was passed through a short silica gel column eluted with EtOAc and concentrated on a rotary evaporator. The residue was subjected to preparative TLC on silica gel eluted with EtOAc/hexane (1:4) to give **8**. **Compound 8** (17.7 mg, 70% yield, 99% ee, colorless oil): The ee was measured by HPLC (CHIRALPAK<sup>®</sup> IC, hexane/2-propanol = 100/1, flow 1.0 mL/min, 254 nm,  $t_1$  = 16.5 min (major),  $t_2$  = 17.2 min (minor));  $[\alpha]^{20}_D$  -46 ( $c$  0.89,  $CHCl_3$ ) for 99% ee;  $^1H$  NMR (400 MHz,  $CDCl_3$ )  $\delta$  7.40–7.31 (m, 5H), 7.27–7.23 (m, 3H), 7.06 (d,  $J$  = 7.2 Hz, 1H), 2.55 (d,  $J$  = 14.2 Hz, 1H), 2.29 (d,  $J$  = 14.2 Hz, 1H), 2.09 (s, 1H), 1.79 (q,  $J$  = 7.2 Hz, 2H), 1.26 (s, 3H), 0.95 (t,  $J$  = 7.2 Hz, 3H);  $^{13}C\{^1H\}$  NMR (100 MHz,  $CDCl_3$ )  $\delta$  152.3, 147.8, 146.7, 128.8, 128.0, 127.3, 126.7, 126.0, 124.5, 123.3, 84.3, 56.8, 46.3, 35.6, 26.9, 9.6; HRMS (ESI)  $m/z$ :  $[M + Na]^+$  Calcd for  $C_{18}H_{20}ONa$  275.1406; Found 241.1404.

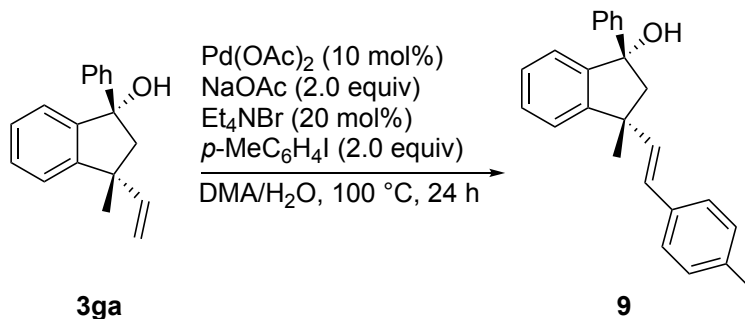

$Pd(OAc)_2$  (0.7 mg, 0.03 mmol, 10 mol%),  $NaOAc$  (5.3 mg, 0.066 mmol, 2.0 equiv),  $Et_4NBr$  (1.4 mg, 20 mol%),  $p$ -iodotoluene (14.2 mg, 0.066 mmol, 2.0 equiv) and

**3ga** (8.2 mg, 0.033 mmol) were placed in a Schlenk tube under N<sub>2</sub>. *N,N*-Dimethylacetamide (DMA, 0.36 mL) and H<sub>2</sub>O (0.04 mL) were added to the tube, and the mixture was stirred at 100 °C for 24 h. The resulting mixture was passed through a short silica gel column eluted with EtOAc, and the mixture was concentrated on a rotary evaporator. The residue was subjected to preparative TLC on silica gel eluted with Et<sub>2</sub>O/hexane (1:10) to give **9**. **Compound 9** (9.0 mg, 80% yield, 98% ee, colorless oil): The ee was measured by HPLC (CHIRALCEL<sup>®</sup> OD-H, hexane/2-propanol = 200/1, flow 1.0 mL/min, 254 nm, t<sub>1</sub> = 35.6 min (major), t<sub>2</sub> = 88.7 min (minor)); [α]<sup>25</sup><sub>D</sub> +6.5 (c 0.19, CHCl<sub>3</sub>) for 98% ee; <sup>1</sup>H NMR (400 MHz, CDCl<sub>3</sub>) δ 7.46–7.22 (m, 10H), 7.10–7.08 (m, 3H), 6.60 (d, *J* = 16.0 Hz, 1H), 6.17 (d, *J* = 16.0 Hz, 1H), 2.71 (d, *J* = 14.2 Hz, 1H), 2.52 (d, *J* = 14.2 Hz, 1H), 2.35 (s, 1H), 2.32 (s, 3H), 1.54 (s, 3H); <sup>13</sup>C {<sup>1</sup>H} NMR (100 MHz, CDCl<sub>3</sub>) δ 149.3, 147.5, 146.2, 139.2, 137.0, 134.2, 129.2, 128.9, 128.0, 127.9, 126.9, 126.8, 126.2, 126.1, 124.8, 124.3, 84.1, 59.5, 48.4, 26.8, 21.1; HRMS (ESI) *m/z*: [M + Na]<sup>+</sup> Calcd for C<sub>25</sub>H<sub>24</sub>ONa 363.1719; Found 363.1713.

### 13. Determination of the Absolute Configuration

(1*S*,3*S*)-**3aa** and (1*R*,3*S*)-**3aa'** were prepared from (1*S*,3*S*)-**10**, which was derived from aldehyde **S1** by the asymmetric [3+2] annulation with isoprene.<sup>6</sup>

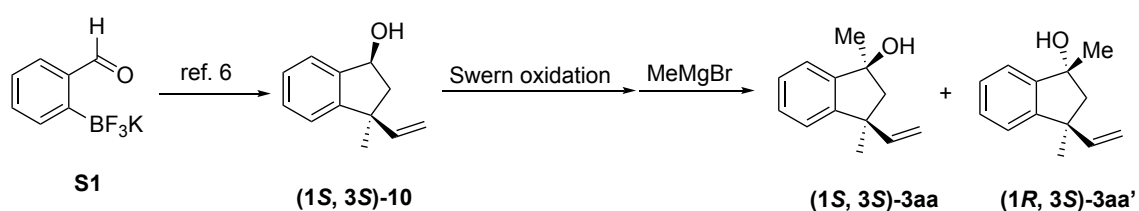

To a solution of (COCl)<sub>2</sub> (18.8 mg, 0.15 mmol, 2.0 equiv) in CH<sub>2</sub>Cl<sub>2</sub> (0.4 mL) was added DMSO (17.3 mg, 0.22 mmol, 3.0 equiv) in CH<sub>2</sub>Cl<sub>2</sub> (0.4 mL) at -78 °C, and the mixture was stirred for 5 min. To the mixture was added a solution of (1*S*,3*S*)-**10** (12.9 mg, 0.074 mmol) in CH<sub>2</sub>Cl<sub>2</sub> (0.4 mL), and the mixture was stirred at -78 °C for 30 min. Then, Et<sub>3</sub>N (44.6 mg, 0.44 mmol, 6.0 equiv) was added to the mixture at the same temperature. The mixture was stirred for 10 min and allowed to warm to room temperature. The resulting mixture was quenched with NH<sub>4</sub>Cl aq. and extracted with

CH<sub>2</sub>Cl<sub>2</sub>. The organic layer was concentrated on a rotary evaporator, and the residue (5.8 mg) was used for the next reaction step without further purification. The residue (5.8 mg) was dissolved in THF (0.17 mL). To the solution was added MeMgCl in THF (3.0 M solution) (2.0 equiv) at 0 °C, and the mixture was stirred at room temperature for 1 h. The resulting mixture was quenched with NH<sub>4</sub>Cl aq., extracted with Et<sub>2</sub>O, and organic extract was concentrated on a rotary evaporator. The residue was subjected to preparative TLC on silica gel eluted with Et<sub>2</sub>O/hexane (1:8) to give a mixture of (1*S*,3*S*)-**3aa** and (1*R*,3*S*)-**3aa'** (2.2 mg, 4:6). A peak of the prepared (1*S*,3*S*)-**3aa** by HPLC analysis using CHIRALCEL<sup>®</sup> OD-H (hexane/2-propanol = 100:1, flow 1.0 mL/min) was observed at 16.9 min. A major peak of compound **3aa** obtained in Scheme 3 appeared at 20.2 min, indicating that the absolute configuration of **3aa** in Scheme 2 is (1*R*,3*R*).

HPLC chart of (*rac*)-**3aa**

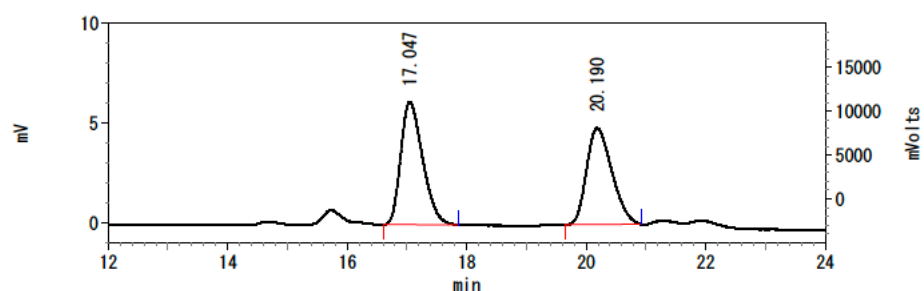

| Pk # | Retention Time | Area   | Area Percent |
|------|----------------|--------|--------------|
| 1    | 17.047         | 156298 | 52.289       |
| 2    | 20.190         | 142614 | 47.711       |

HPLC chart of **3aa** in Scheme 2

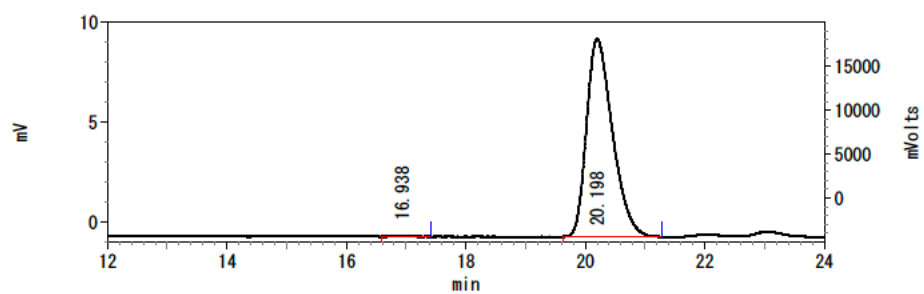

| Pk # | Retention Time | Area   | Area Percent |
|------|----------------|--------|--------------|
| 1    | 16.938         | 485    | 0.162        |
| 2    | 20.198         | 299219 | 99.838       |

HPLC chart of (1*S*,3*S*)-**3aa**

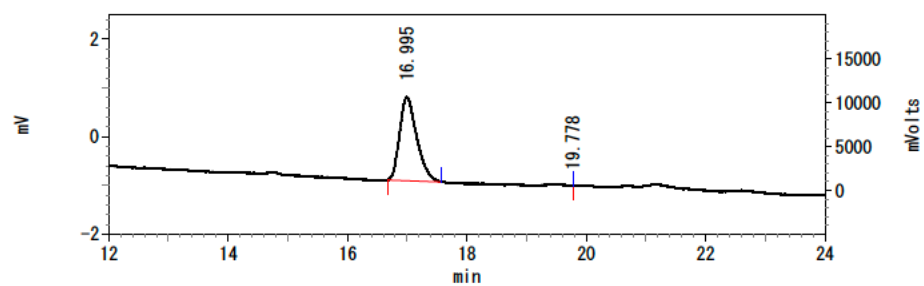

| Pk # | Retention Time | Area  | Area Percent |
|------|----------------|-------|--------------|
| 1    | 16.995         | 34246 | 99.997       |
| 2    | 19.778         | 1     | 0.003        |

## 14. References

1. R. Uson, L. A. Oro and J. A. Cabeza, *Inorg. Synth.*, 1985, **23**, 129.
2. (a) T. M. Beck and B. Breit, *Angew. Chem., Int. Ed.*, 2017, **56**, 1903; (b) R. Mariz, A. Briceño and R. Dorta, *Organometallics*, 2008, **27**, 6605; (c) Y.-N. Yu and M.-H. Xu, *Org. Chem. Front.*, 2014, **1**, 738.
3. S. Chang, Y. B. Sun, X. R. Zhang, L. L. Dong, H. Y. Zhu, H. W. Lai and D. Wang, *Appl. Organomet. Chem.*, 2018, **32**, e3970.
4. H. Itoh, T. Kikuchi, T. Ishiyama and N. Miyaoura, *Chem. Lett.*, 2011, **40**, 1007.
5. (a) F.-W. Ling, M.-C. Luo, M.-K. Chen, J. Zeng, S.-Q. Li, H.-B. Yin, J.-R. Wu, Y.-X. Xu and G. Huang, *Polymer*, 2019, **178**, 121629; (b) P. A. Wender, M. P. Croatt and B. Witulski, *Tetrahedron*, 2006, **62**, 7505.
6. T. Nishimura, Y. Yasuhara, M. Nagaosa and T. Hayashi, *Tetrahedron: Asymmetry*, 2008, **19**, 1778.

15.  $^1\text{H}$  NMR,  $^{13}\text{C}$  NMR,  $^{31}\text{P}$  NMR spectra, chiral HPLC charts

$^1\text{H}$  NMR of L2 (400 MHz,  $\text{CDCl}_3$ )

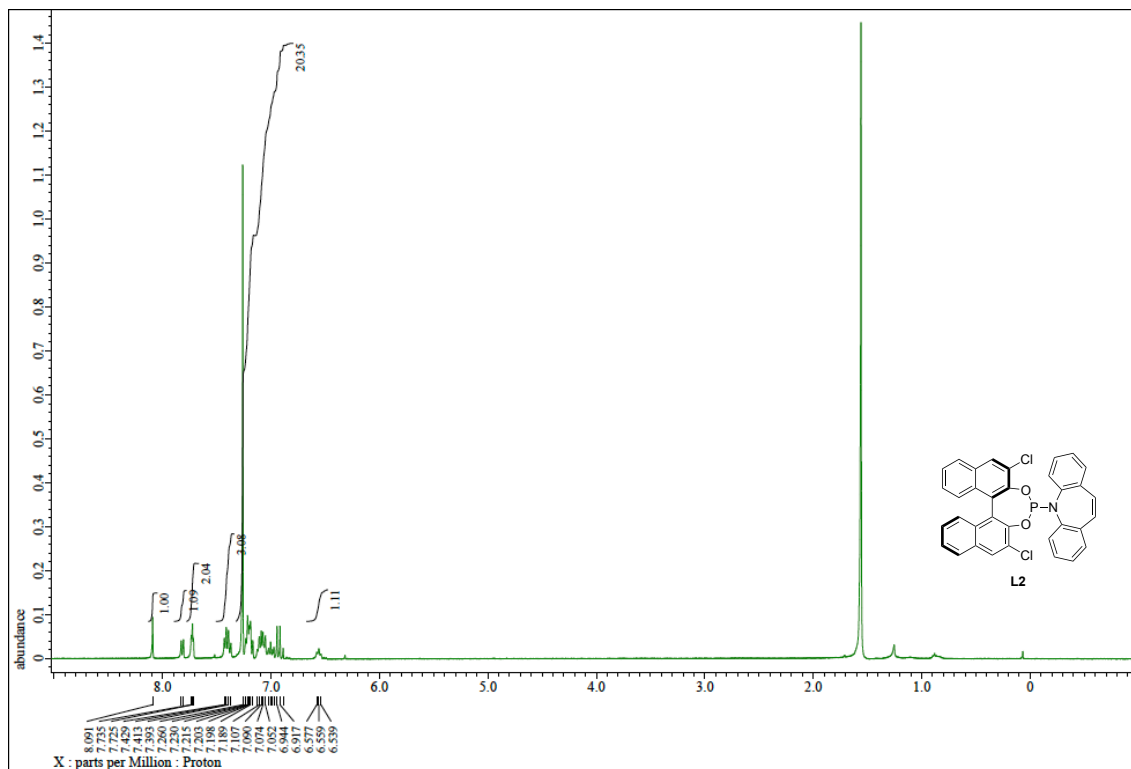



# <sup>13</sup>C NMR of L2 (100 MHz, CDCl<sub>3</sub>)

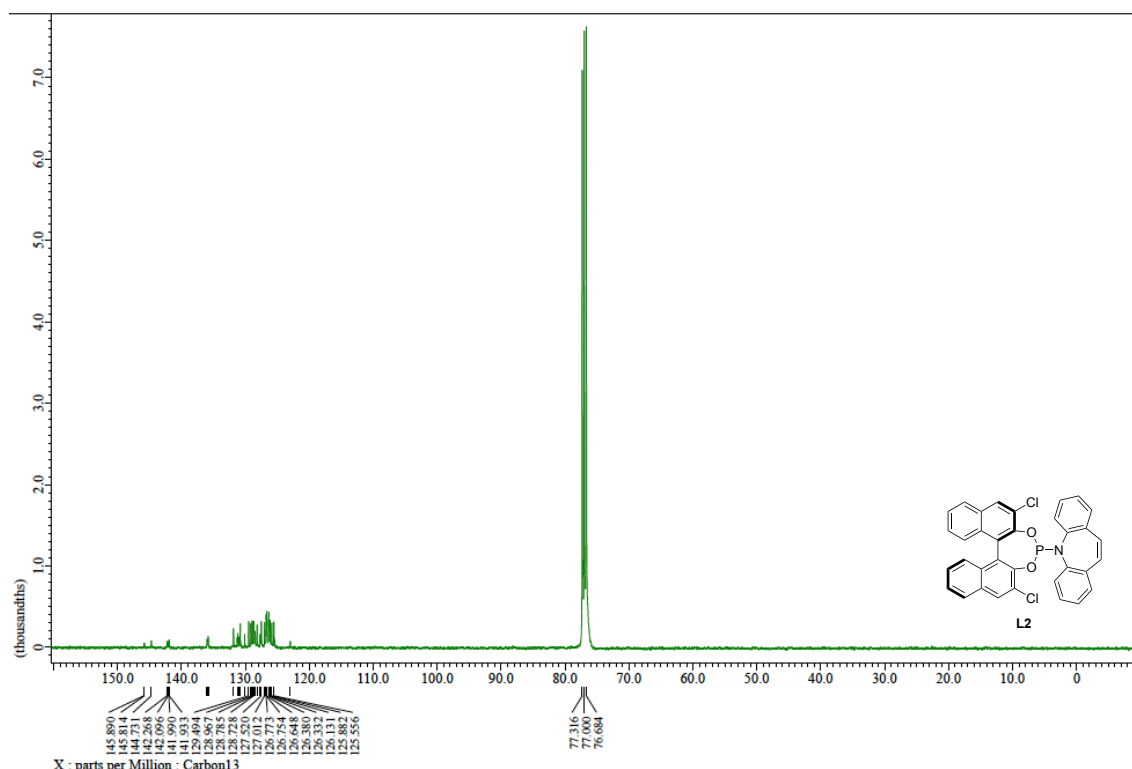

## (150-120 ppm)

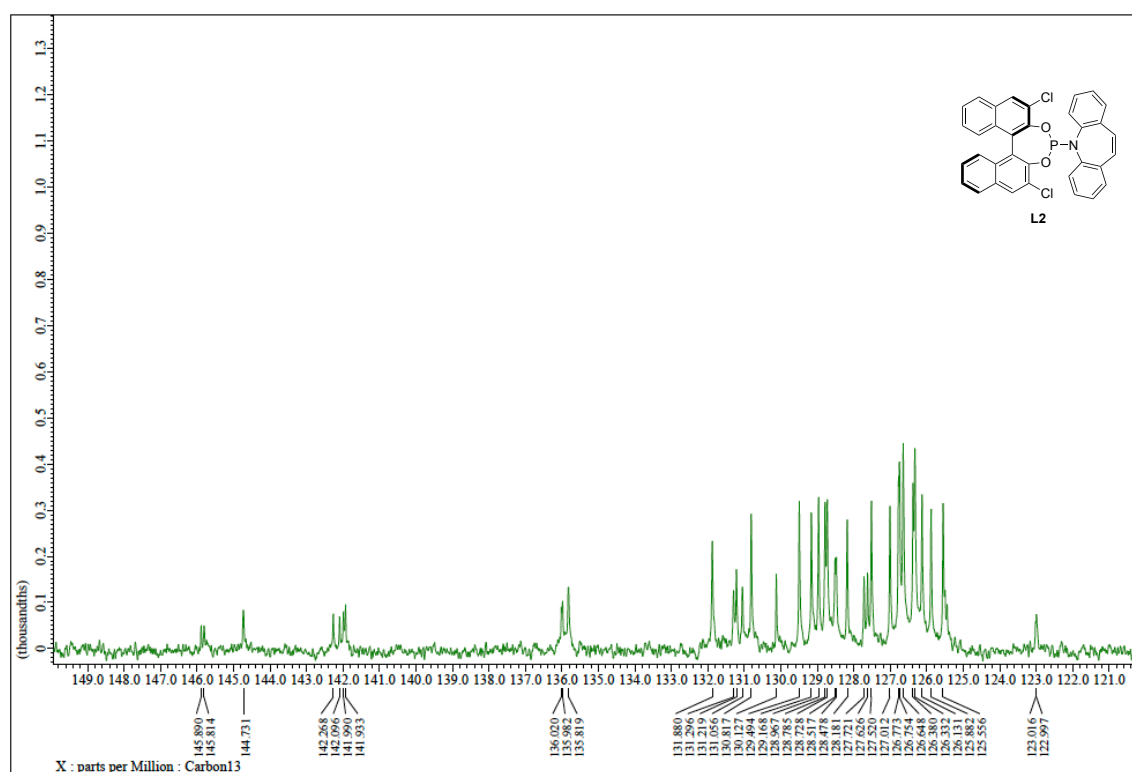

**$^{31}\text{P}$  NMR of L2 (162 MHz,  $\text{CDCl}_3$ )**

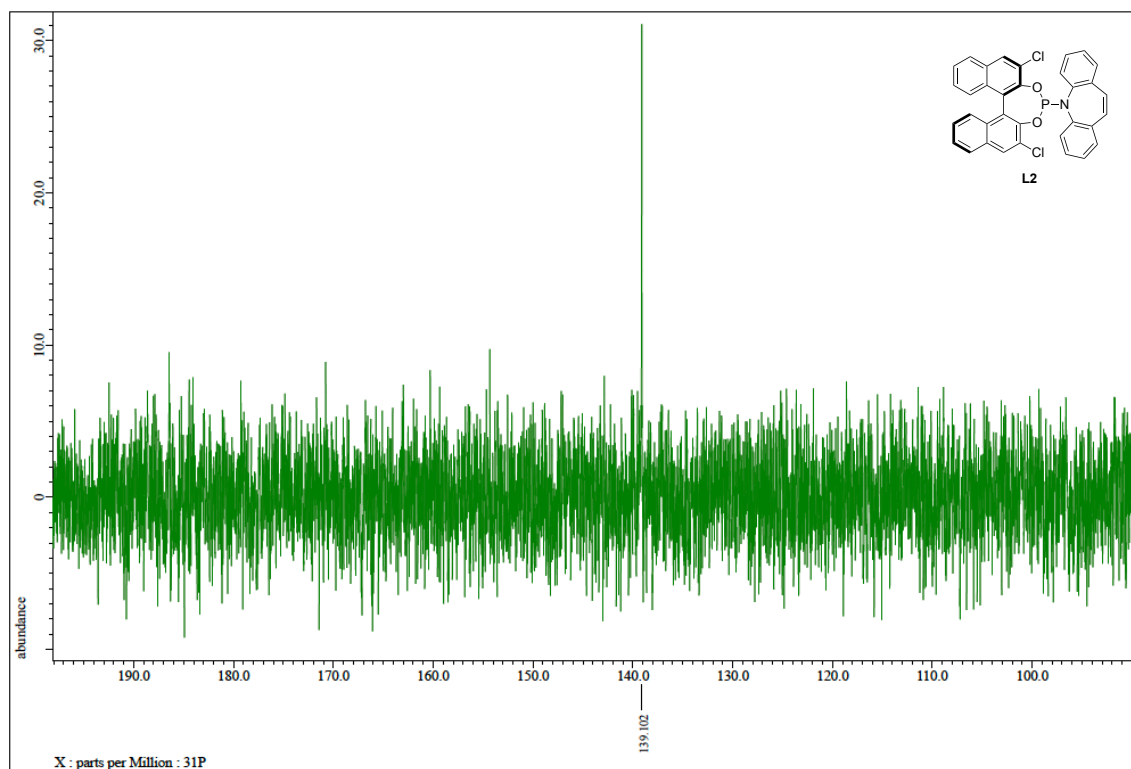

### <sup>1</sup>H NMR of L3 (400 MHz, CDCl<sub>3</sub>)

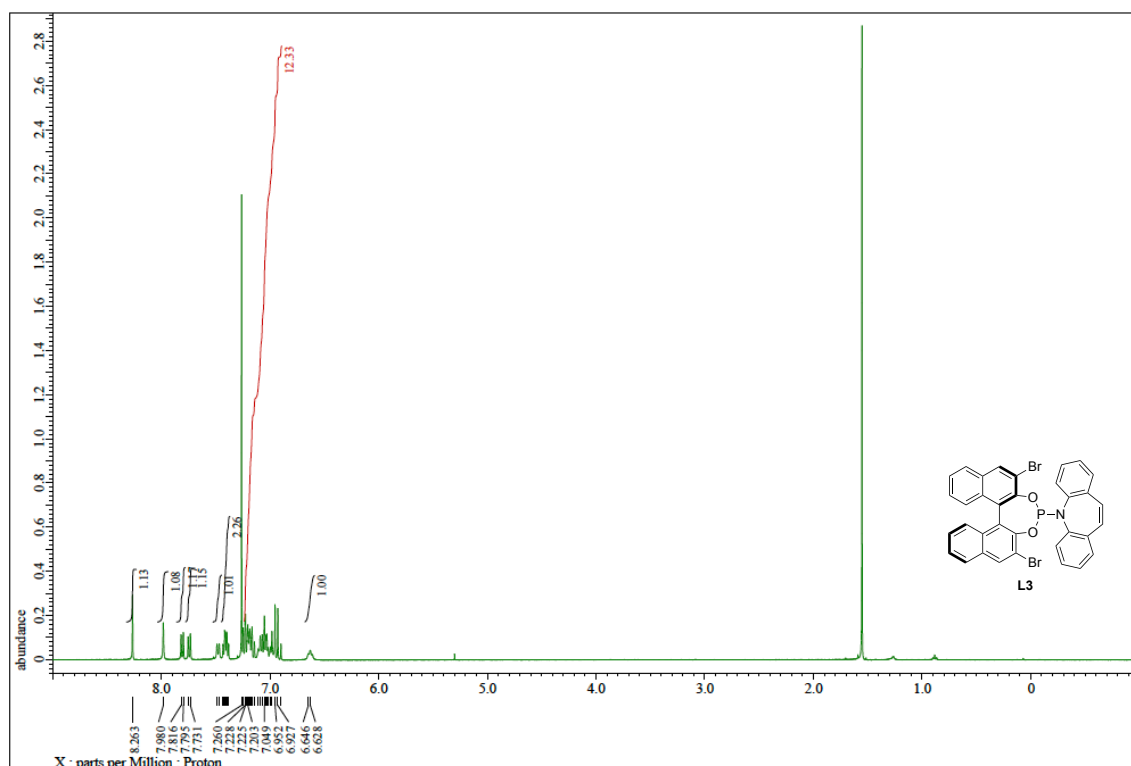

### <sup>13</sup>C NMR of L3 (100 MHz, CDCl<sub>3</sub>, overview)

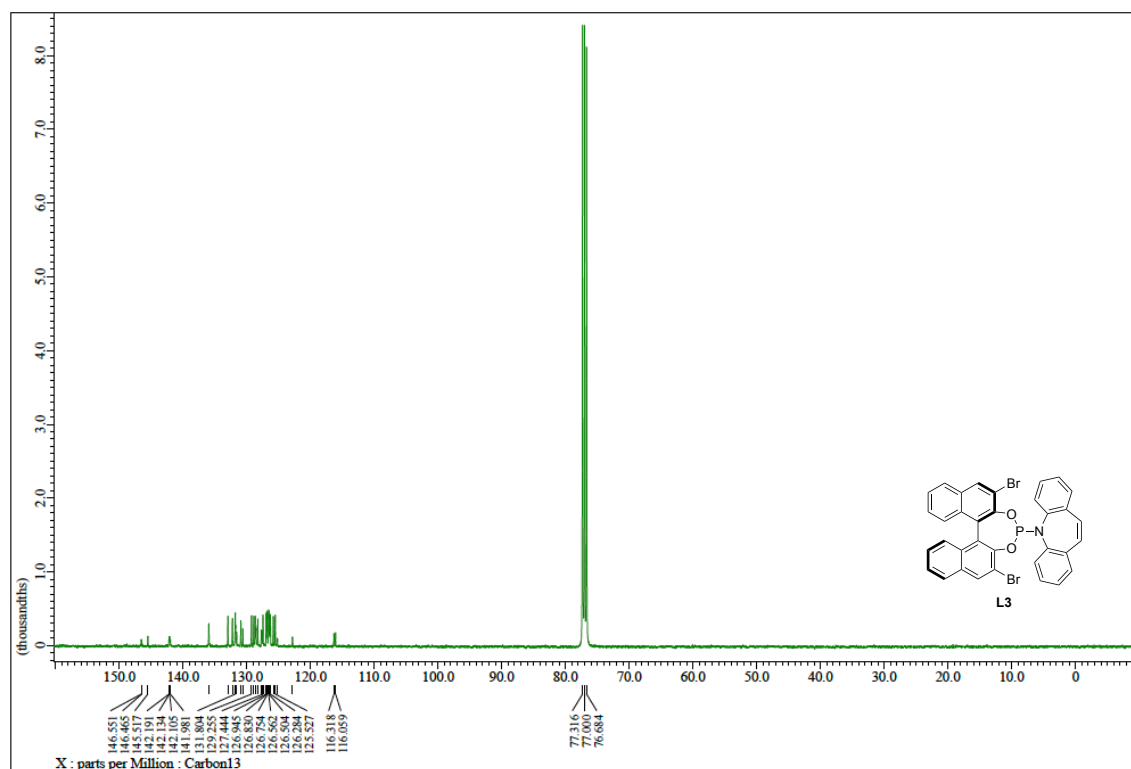

(150-110 ppm)

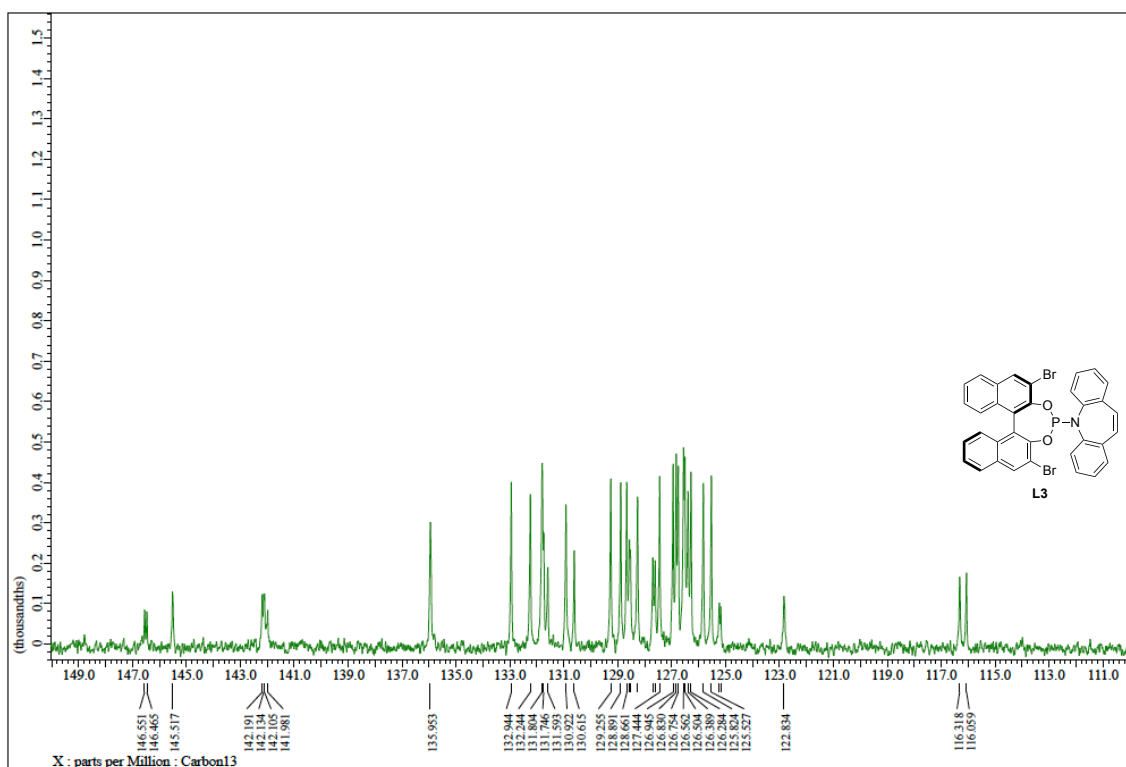

<sup>31</sup>P NMR of L3 (162 MHz, CDCl<sub>3</sub>)

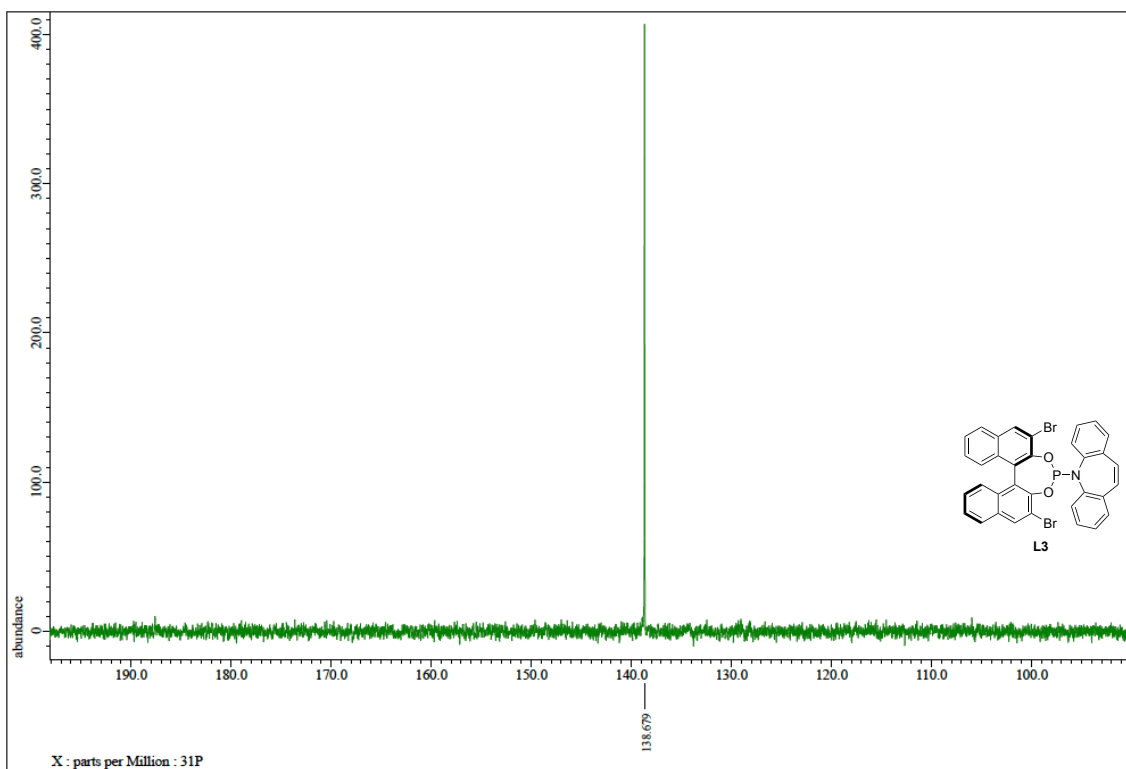

### <sup>1</sup>H NMR of L4 (400 MHz, CDCl<sub>3</sub>)

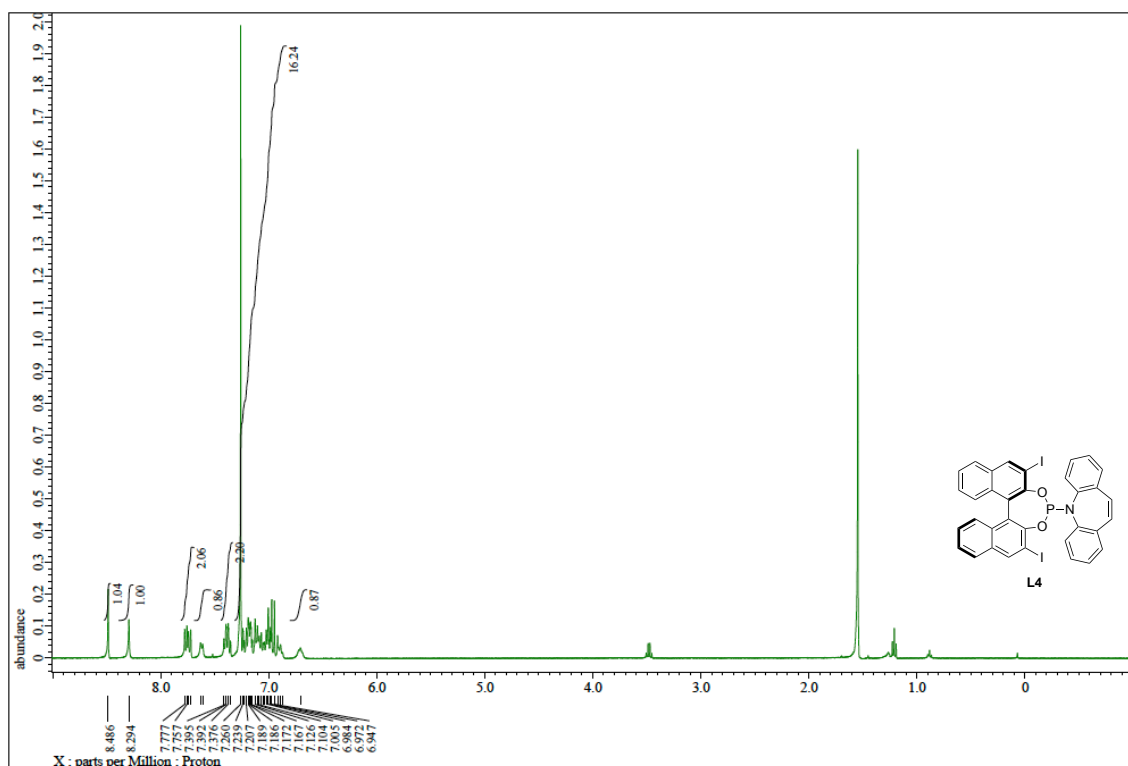

### <sup>13</sup>C NMR of L4 (100 MHz, CDCl<sub>3</sub>, overview)

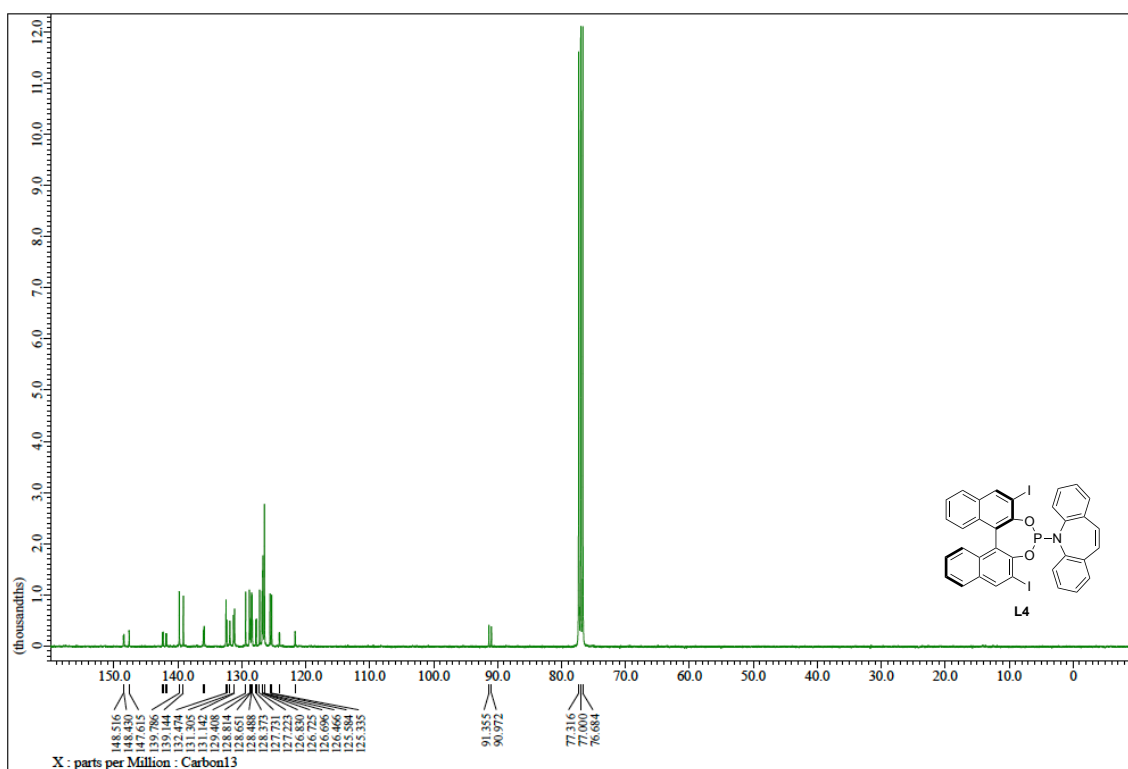

(150-110 ppm)

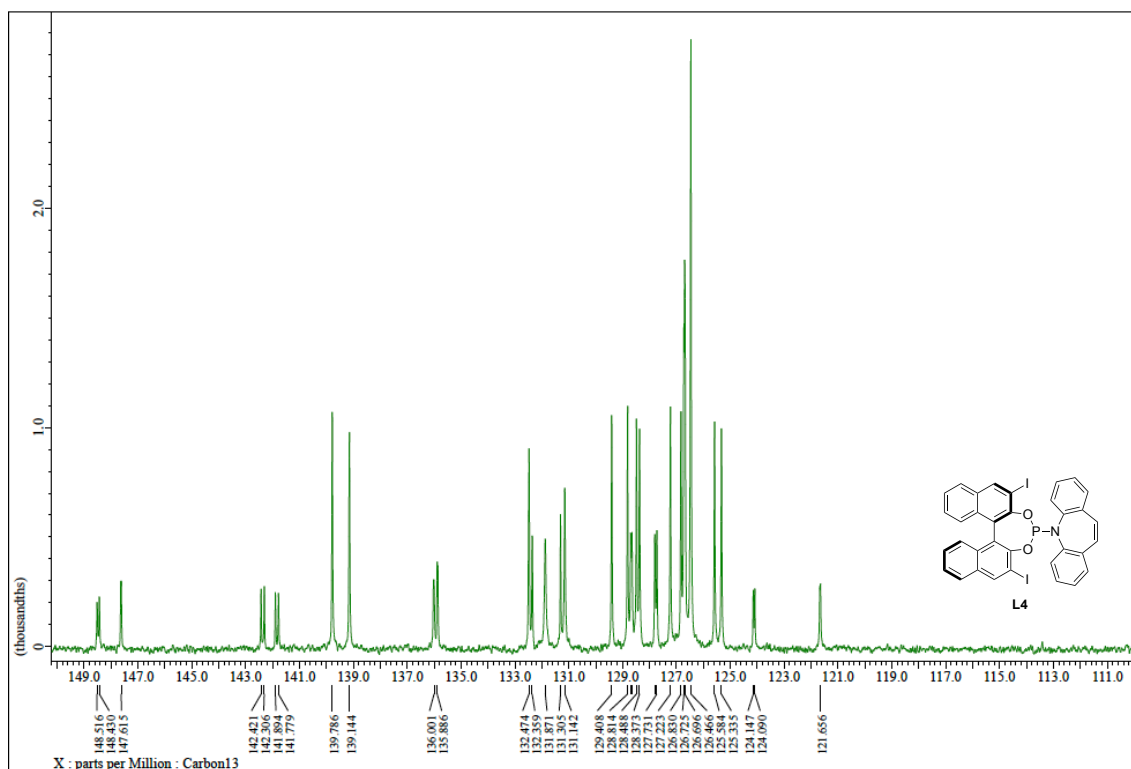

<sup>31</sup>P NMR of L4 (162 MHz, CDCl<sub>3</sub>)

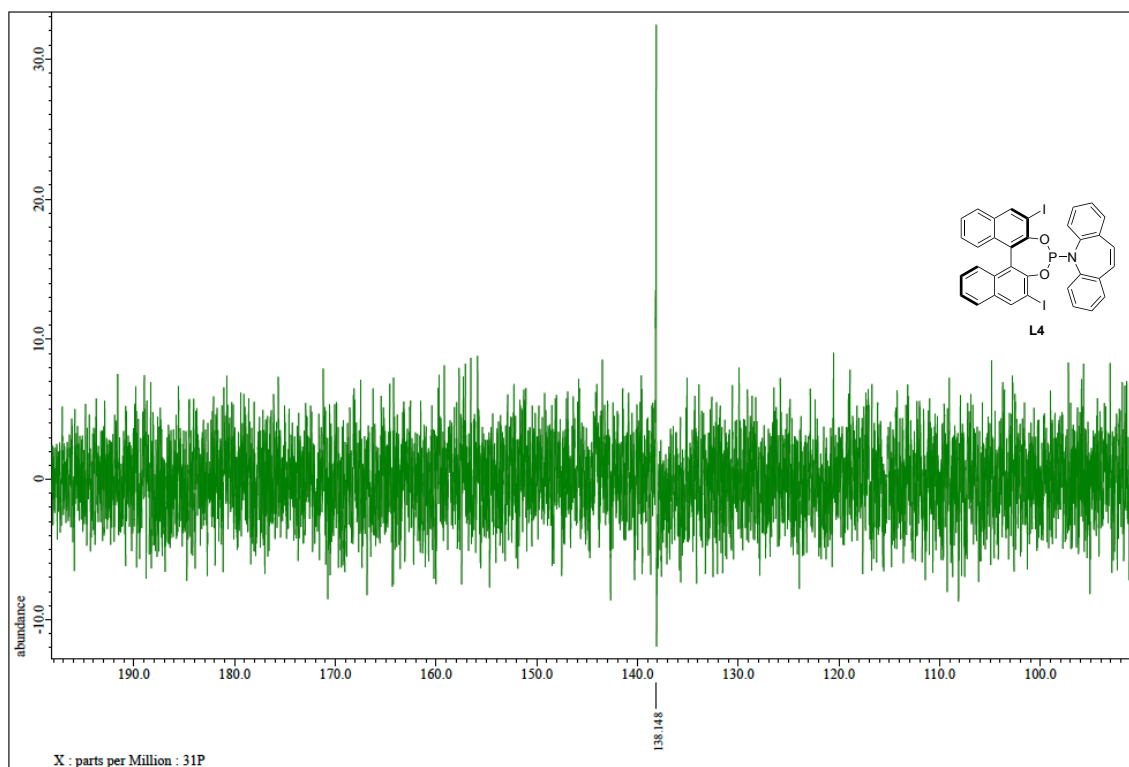

### $^1\text{H}$ NMR of L5 (400 MHz, $\text{CDCl}_3$ )

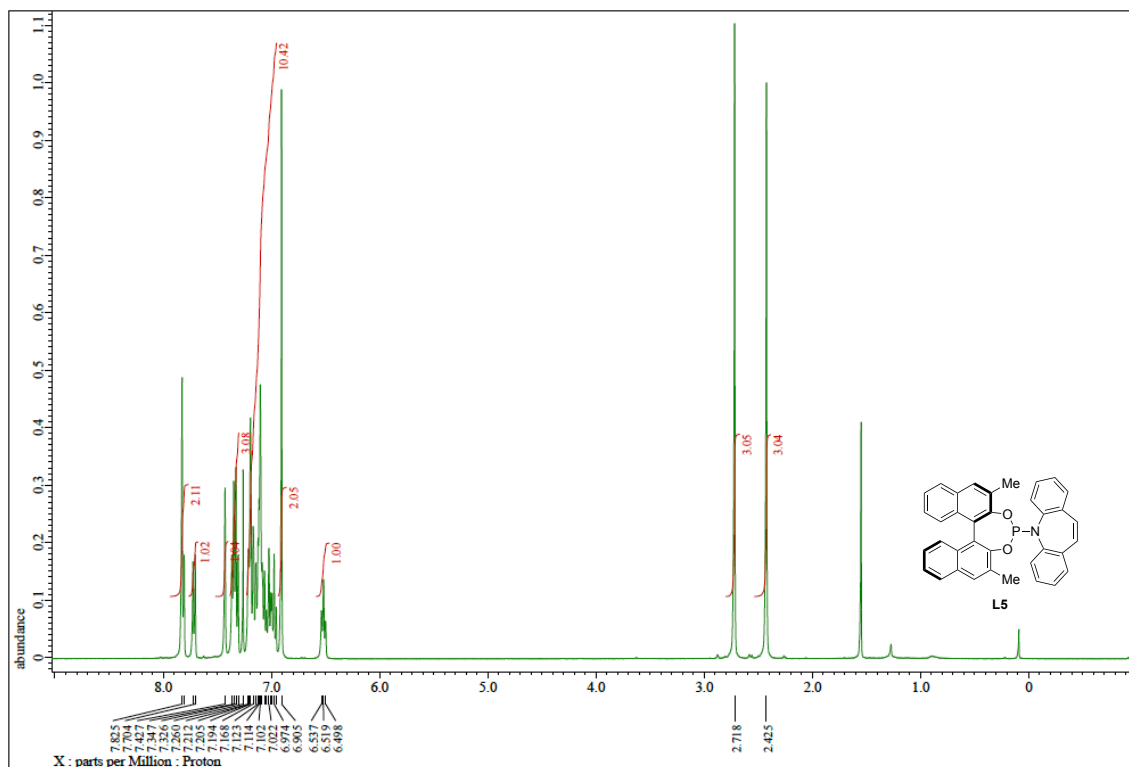

### $^{13}\text{C}$ NMR of L5 (100 MHz, $\text{CDCl}_3$ )

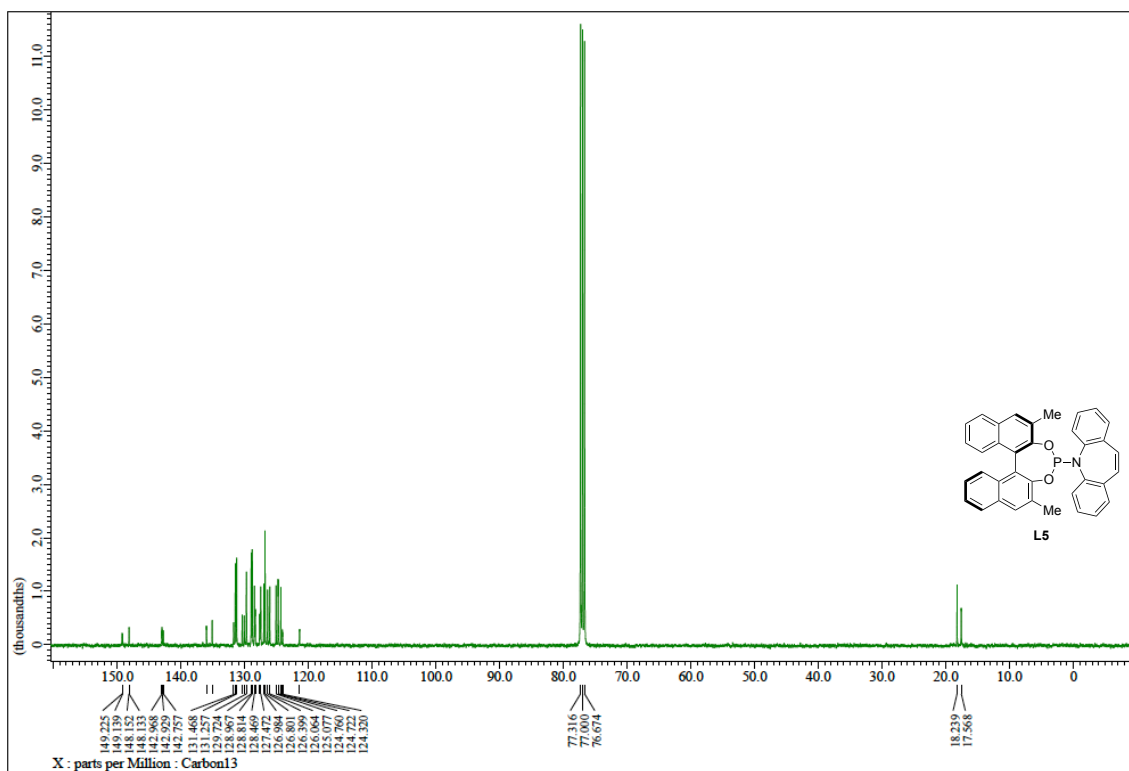

(150-110 ppm)

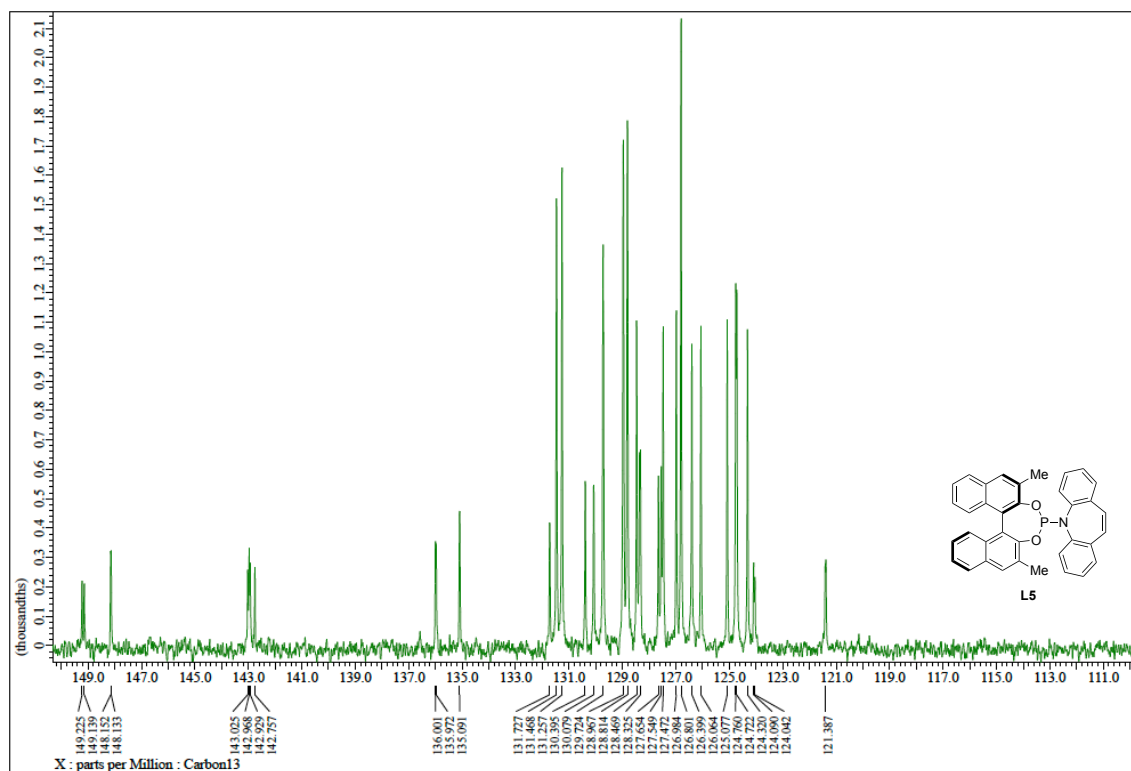

<sup>31</sup>P NMR of L5 (162 MHz, CDCl<sub>3</sub>)

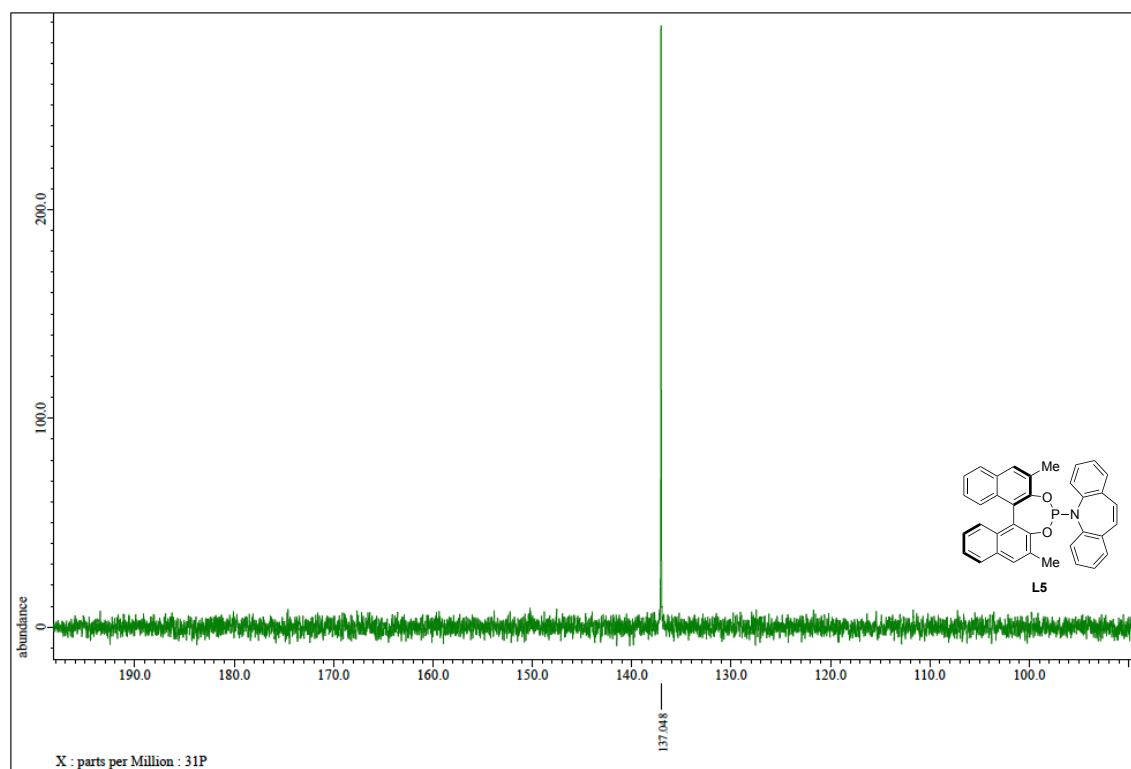



### <sup>1</sup>H NMR of 6j (400 MHz, CDCl<sub>3</sub>)

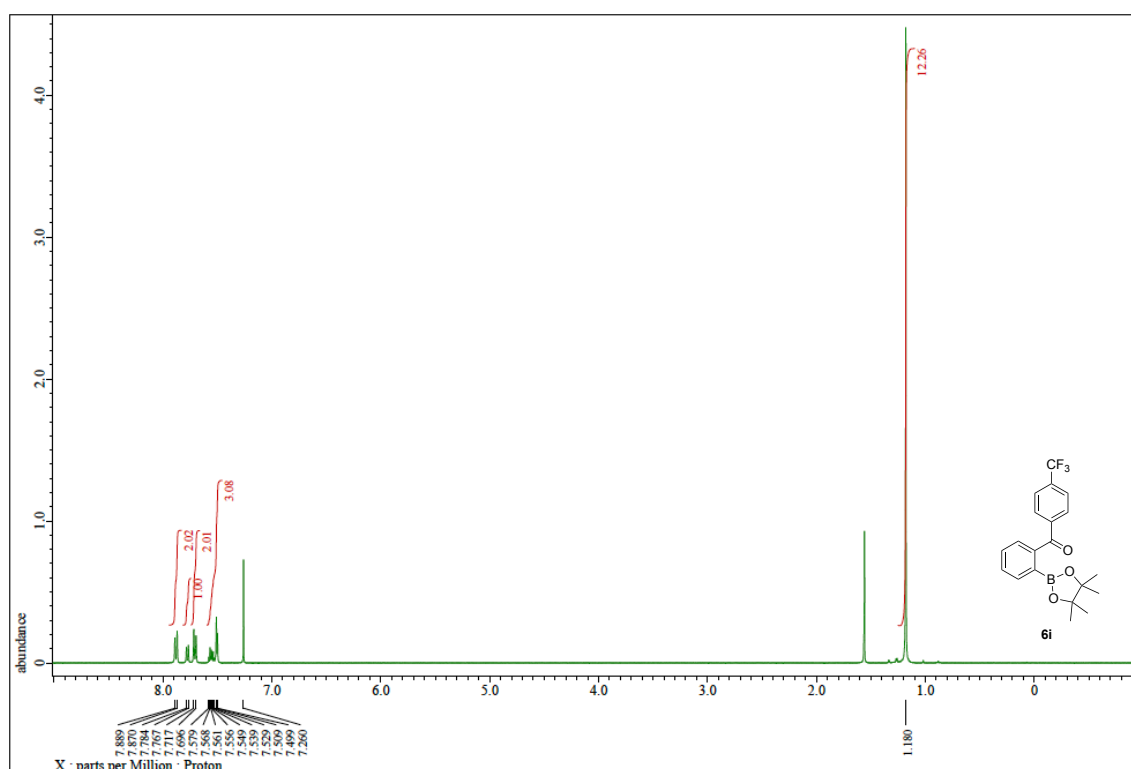

### <sup>13</sup>C NMR of 1i (400 MHz, CDCl<sub>3</sub>, overview)

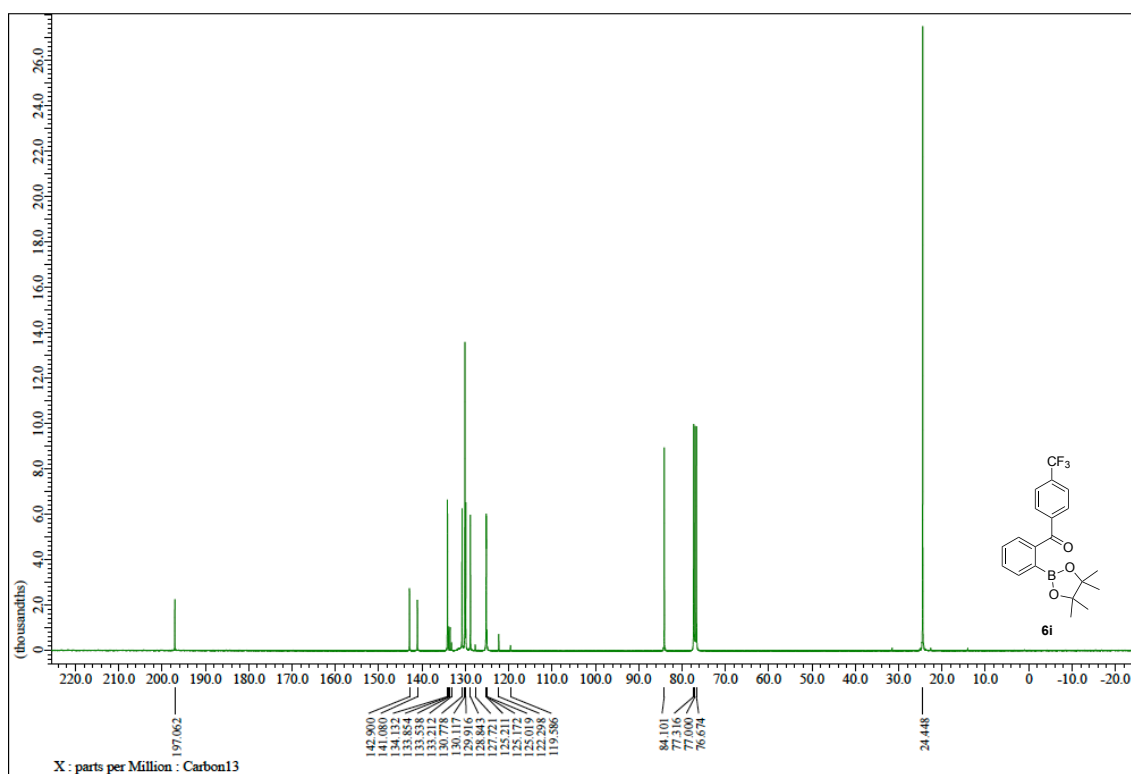

(150-110 ppm)

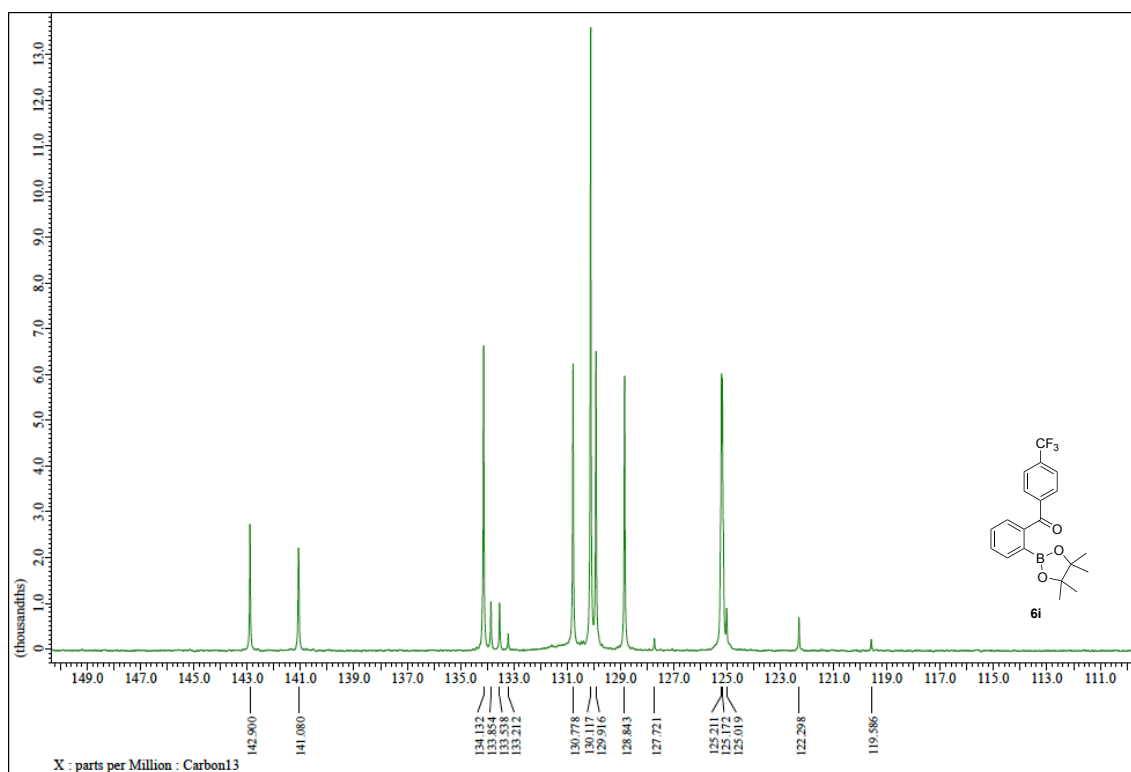

**<sup>1</sup>H NMR of 6j (400 MHz, CDCl<sub>3</sub>)**

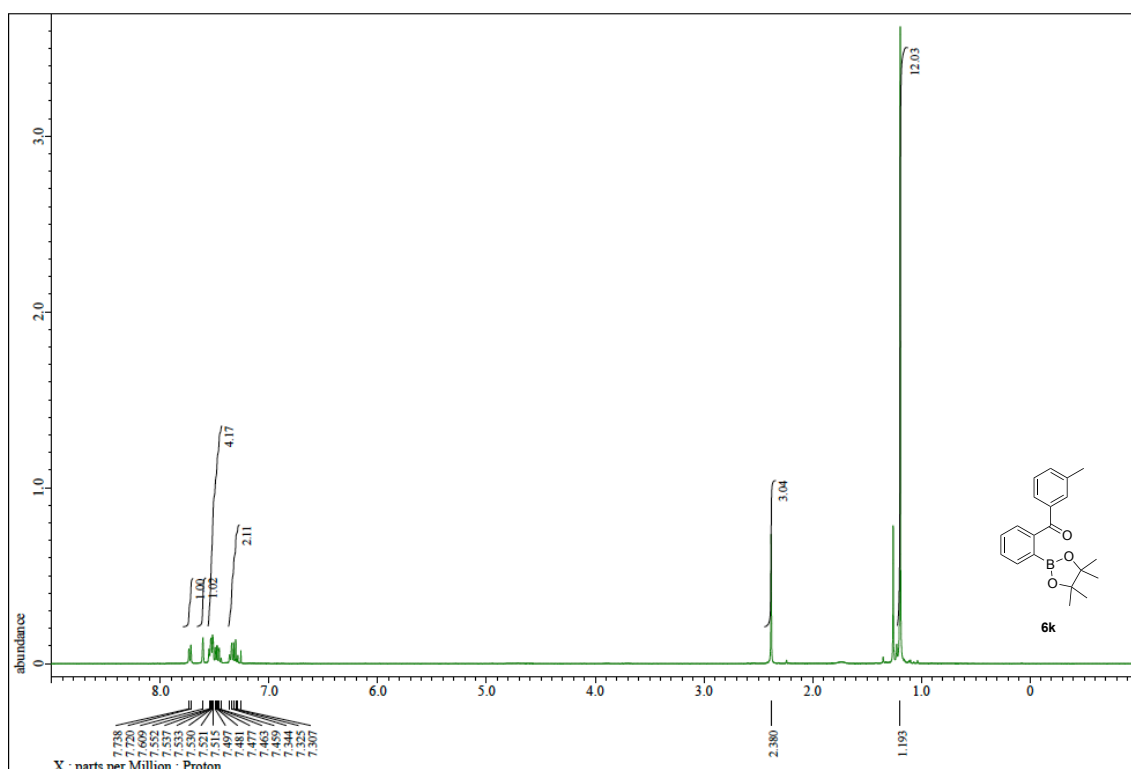

**<sup>13</sup>C NMR of 6j (100 MHz, CDCl<sub>3</sub>)**

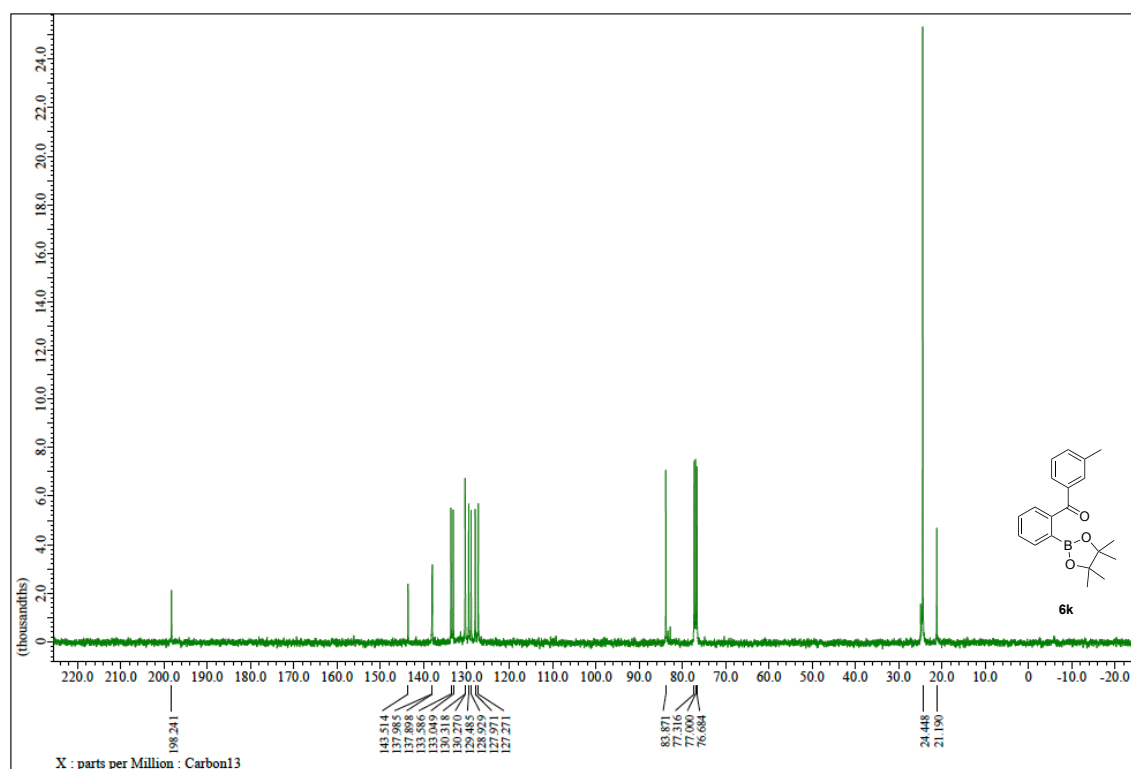

### <sup>1</sup>H NMR of 6k (400 MHz, CDCl<sub>3</sub>)

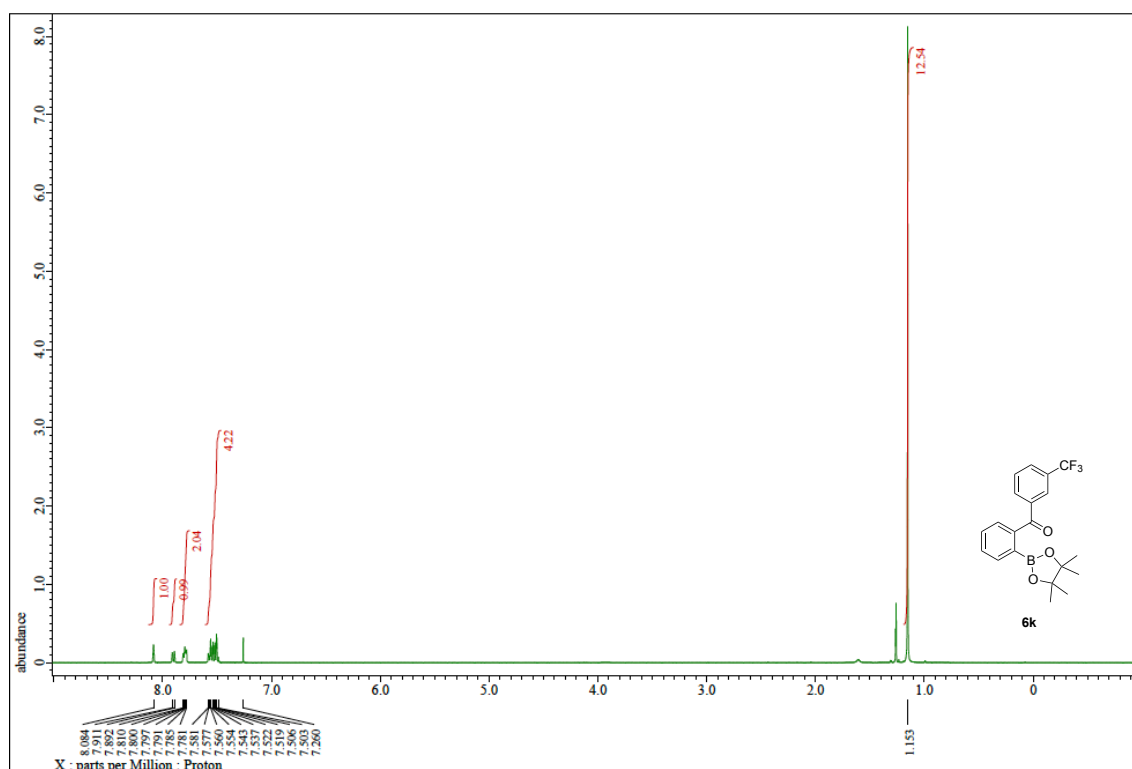

### <sup>13</sup>C NMR of 6k (100 MHz, CDCl<sub>3</sub>, overview)

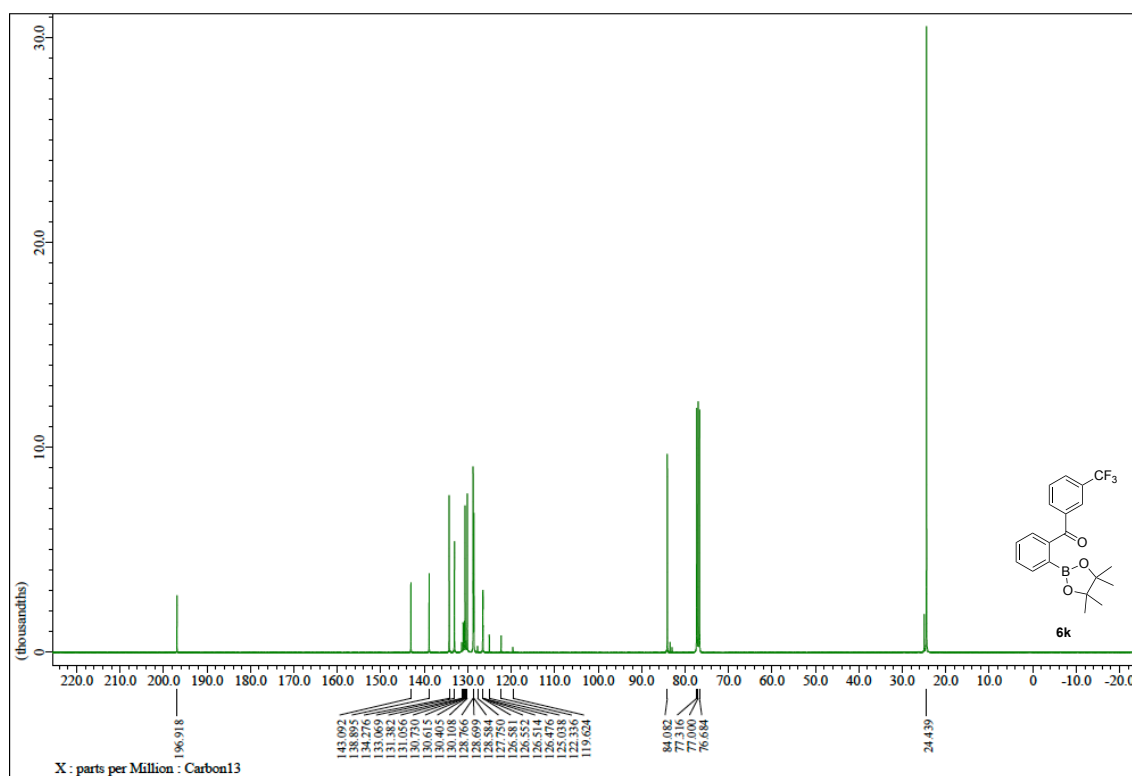

(150-110 ppm)

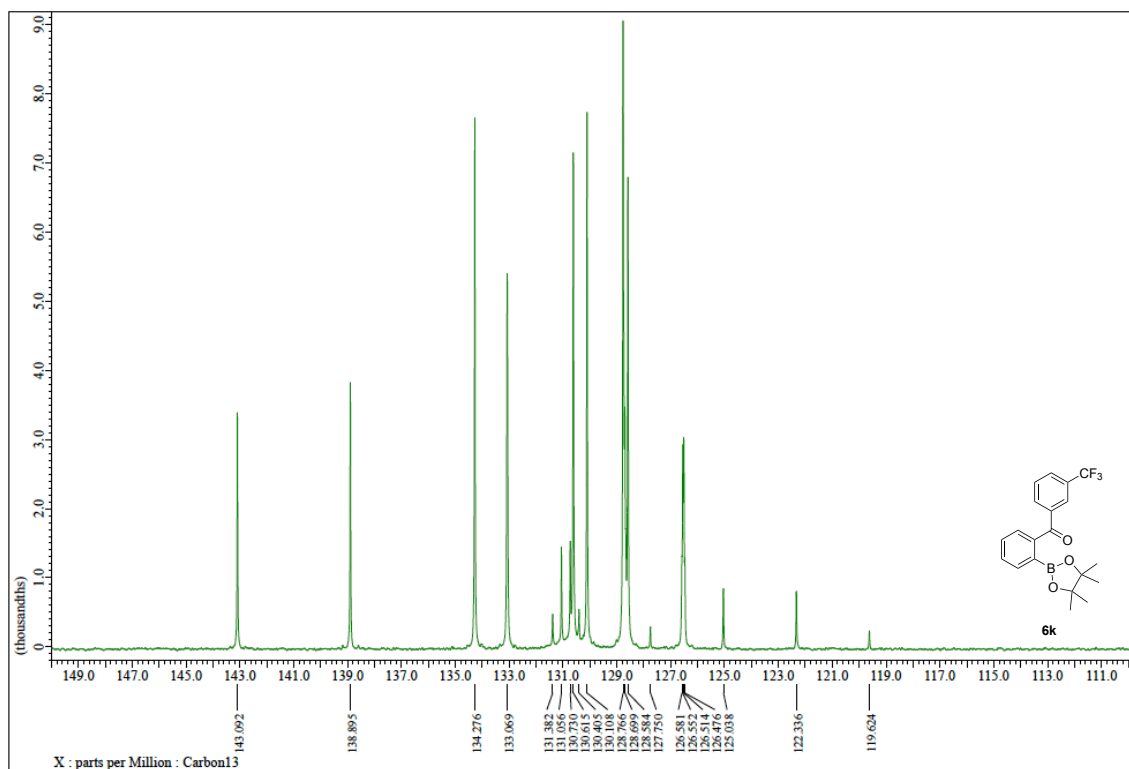

### <sup>1</sup>H NMR of 6m (400 MHz, CDCl<sub>3</sub>)

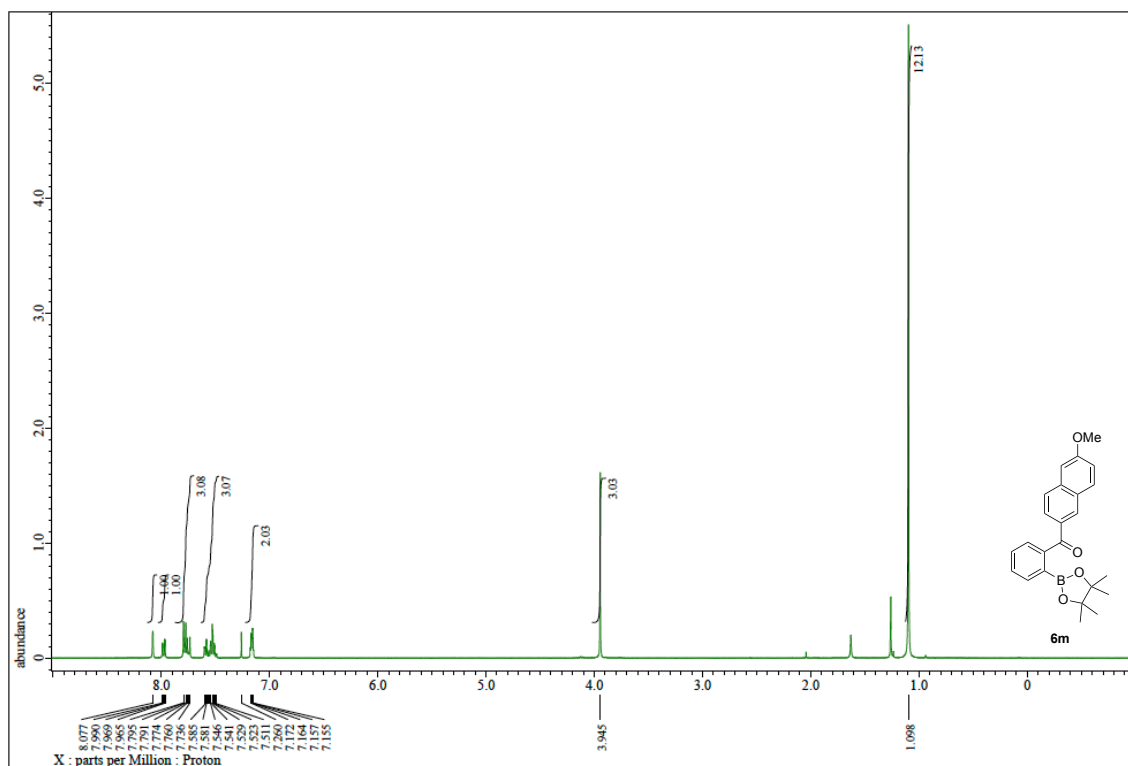

### <sup>13</sup>C NMR of 6m (100 MHz, CDCl<sub>3</sub>)

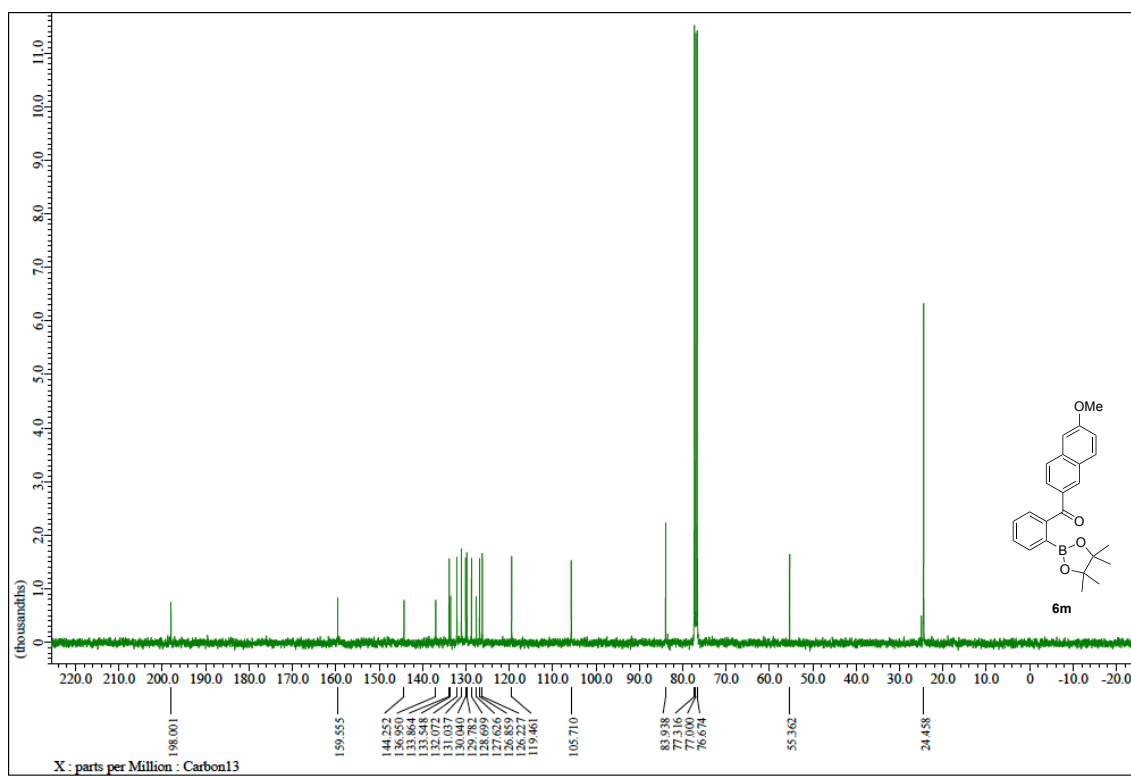

### <sup>1</sup>H NMR of 3aa (400 MHz, CDCl<sub>3</sub>)

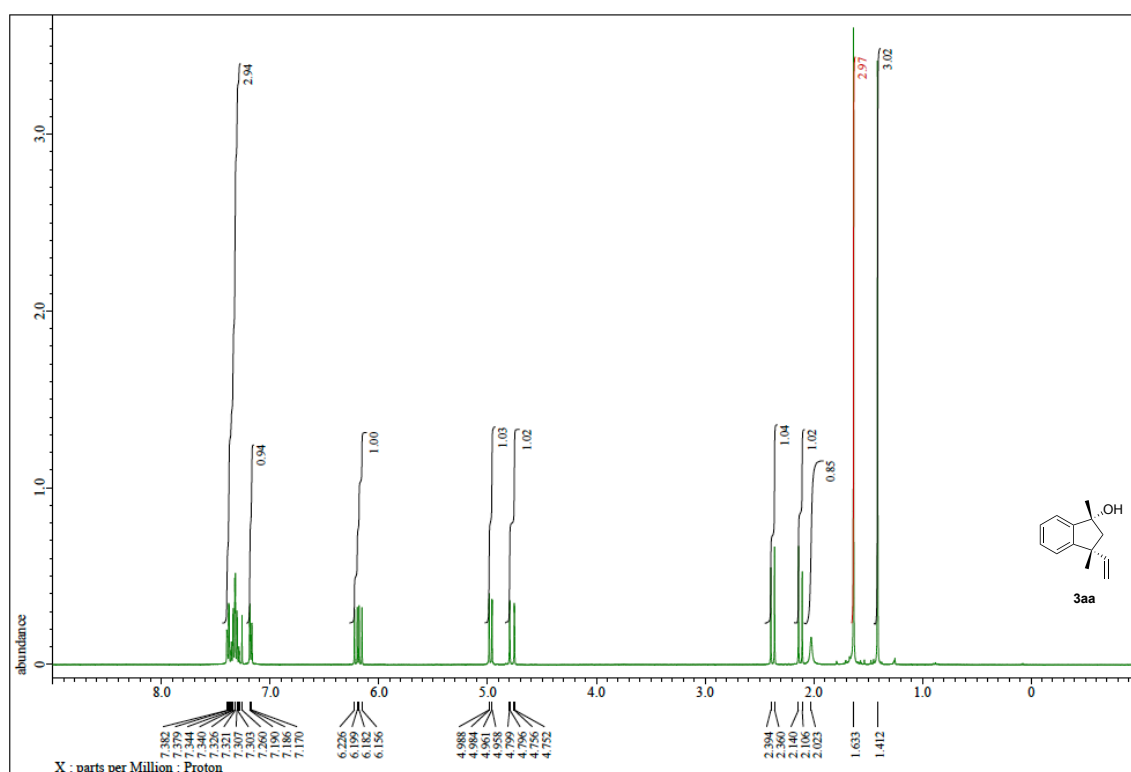

### <sup>13</sup>C NMR of 3aa (100 MHz, CDCl<sub>3</sub>)

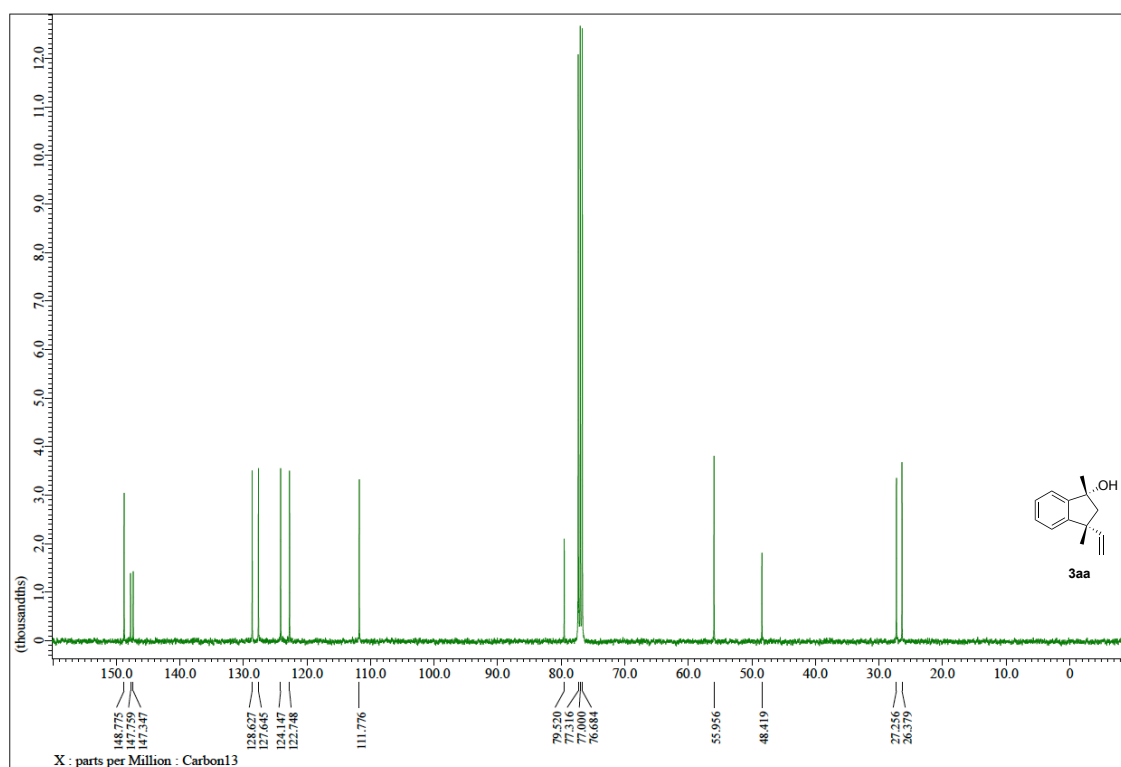

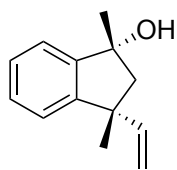

**3aa**

**HPLC chart of (*rac*)-3aa**

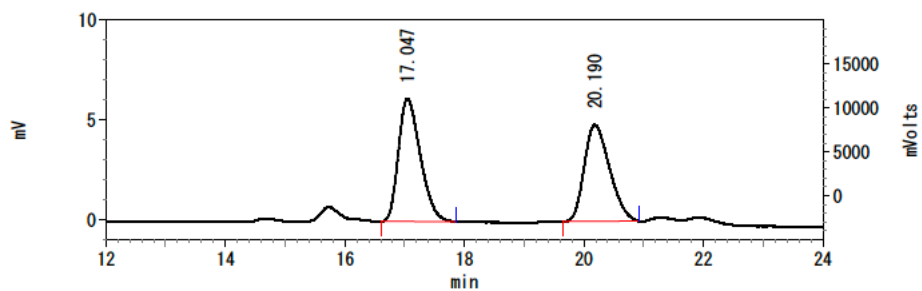

| Pk # | Retention Time | Area   | Area Percent |
|------|----------------|--------|--------------|
| 1    | 17.047         | 156298 | 52.289       |
| 2    | 20.190         | 142614 | 47.711       |

**HPLC chart of (1*R*,3*R*)-3aa**

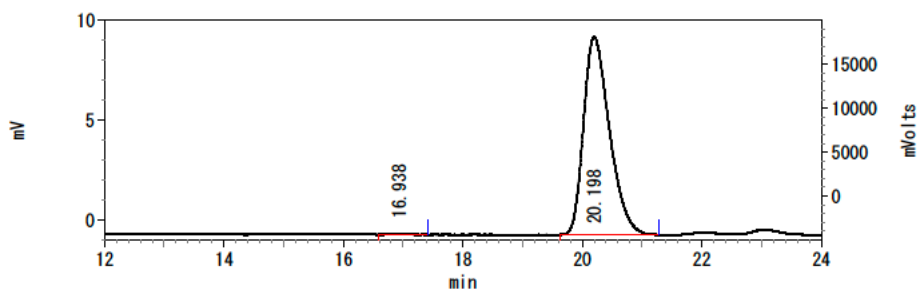

| Pk # | Retention Time | Area   | Area Percent |
|------|----------------|--------|--------------|
| 1    | 16.938         | 485    | 0.162        |
| 2    | 20.198         | 299219 | 99.838       |



### <sup>1</sup>H NMR of 3ba (400 MHz, CDCl<sub>3</sub>)

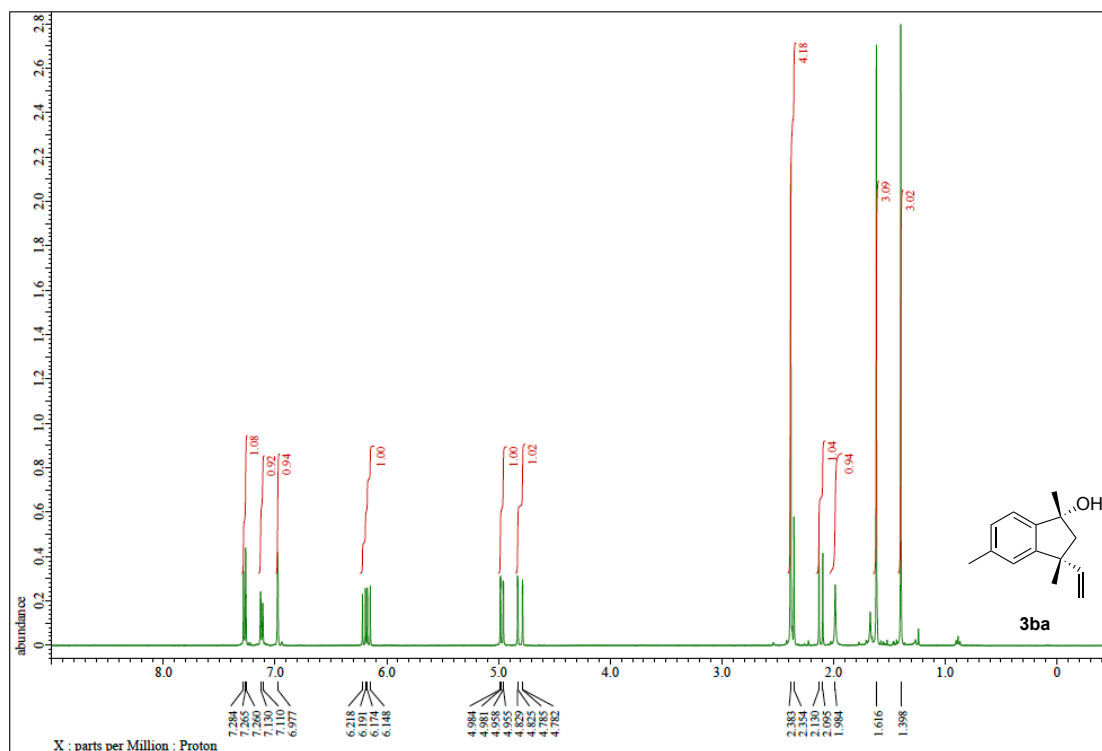

### <sup>13</sup>C NMR of 3ca (100 MHz, CDCl<sub>3</sub>)

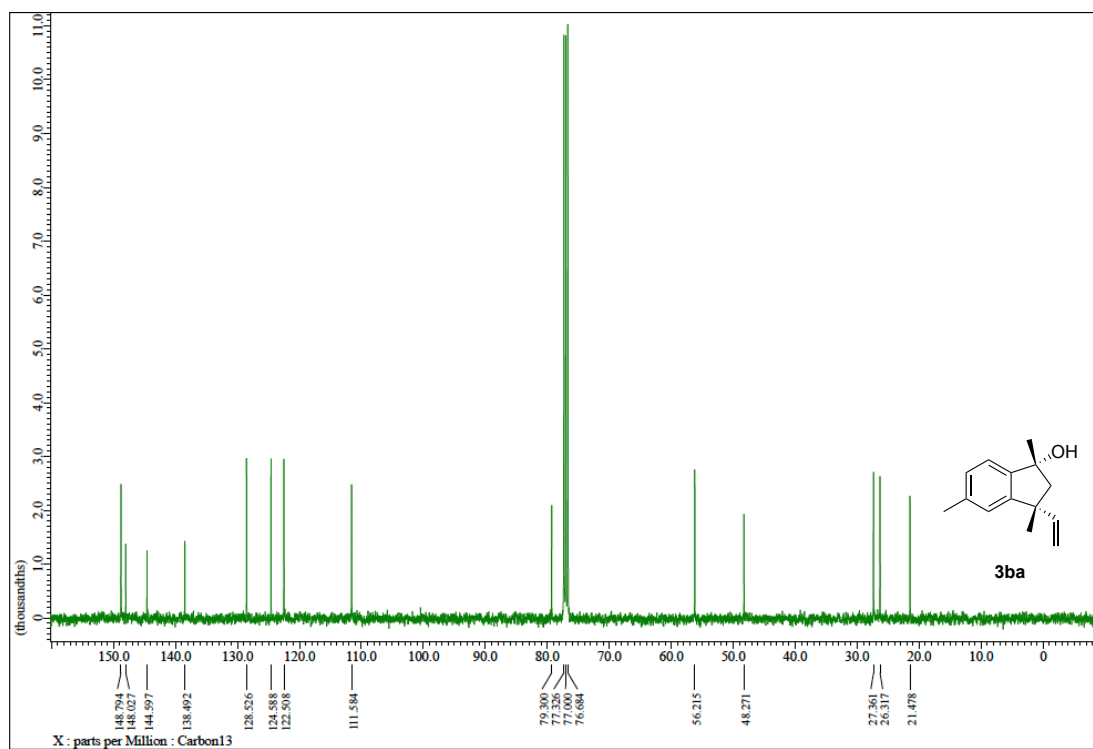

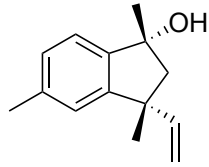

**3ba**

**HPLC chart of (*rac*)-3ba**

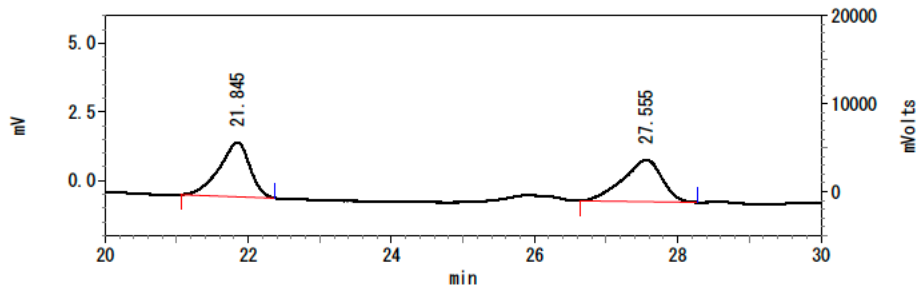

| Pk # | Retention Time | Area  | Area Percent |
|------|----------------|-------|--------------|
| 1    | 21.845         | 59304 | 50.441       |
| 2    | 27.555         | 58266 | 49.559       |

**HPLC chart of (1*R*,3*R*)-3ba**

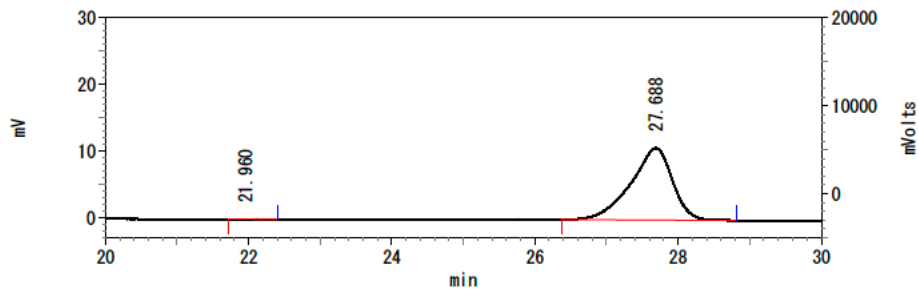

| Pk # | Retention Time | Area   | Area Percent |
|------|----------------|--------|--------------|
| 1    | 21.960         | 509    | 0.116        |
| 2    | 27.688         | 438583 | 99.884       |

### <sup>1</sup>H NMR of 3ca (400 MHz, CDCl<sub>3</sub>)

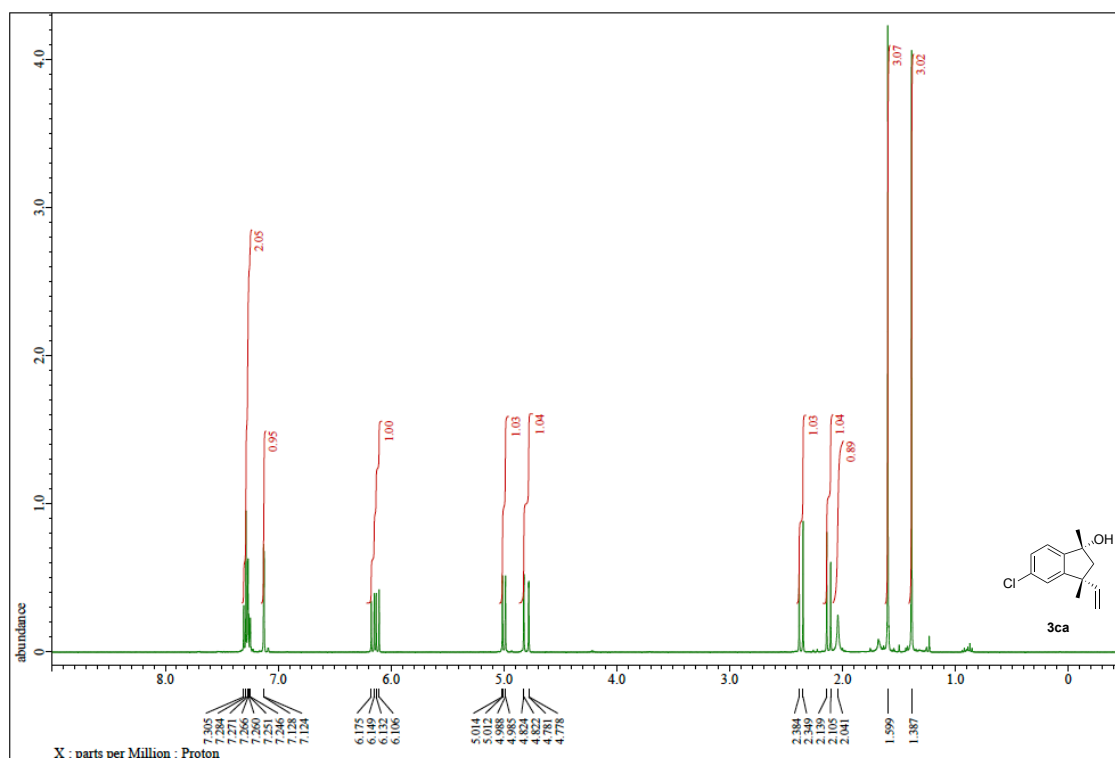

### <sup>13</sup>C NMR of 3ca (100 MHz, CDCl<sub>3</sub>)

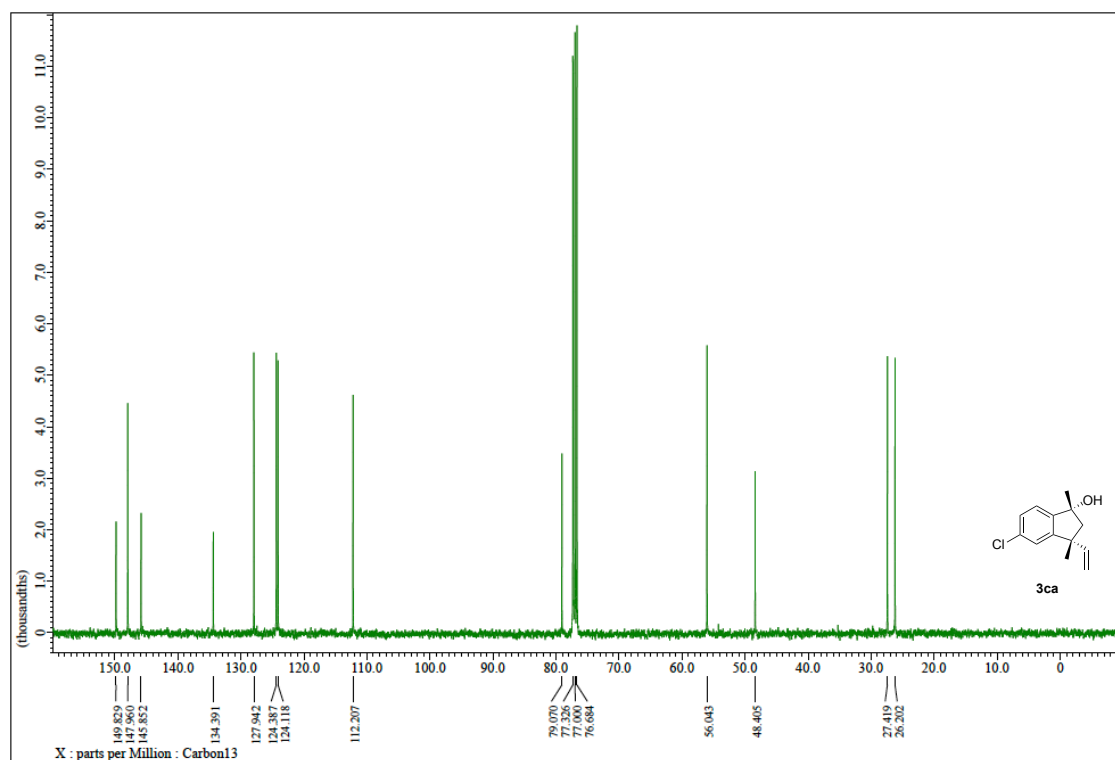

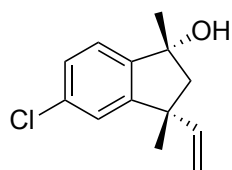

**3ca**

**HPLC chart of (*rac*)-3ca**

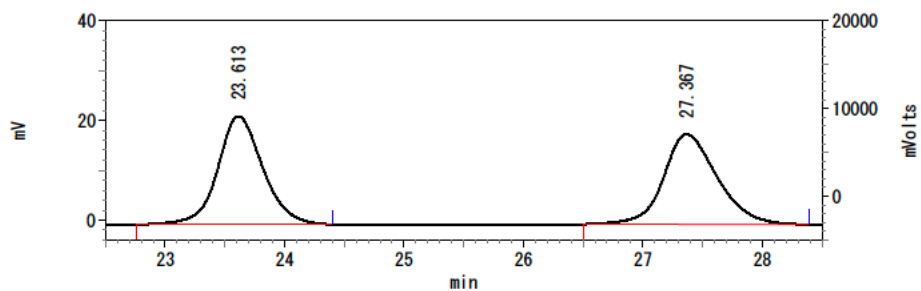

| Pk # | Retention Time | Area   | Area Percent |
|------|----------------|--------|--------------|
| 1    | 23.613         | 570693 | 50.289       |
| 2    | 27.367         | 564126 | 49.711       |

**HPLC chart of (1*R*,3*R*)-3ca**

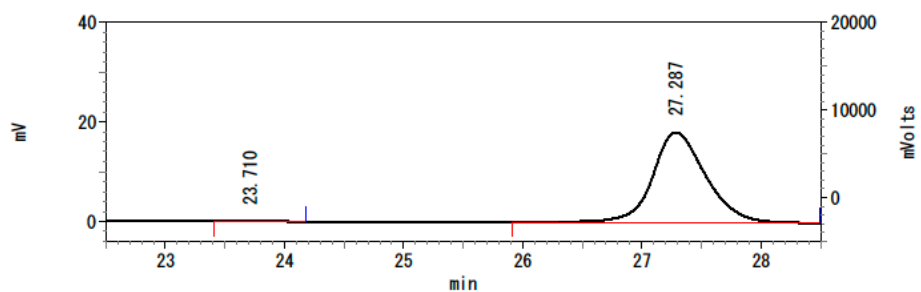

| Pk # | Retention Time | Area   | Area Percent |
|------|----------------|--------|--------------|
| 1    | 23.710         | 1337   | 0.235        |
| 2    | 27.287         | 566754 | 99.765       |

### <sup>1</sup>H NMR of 3da (400 MHz, CDCl<sub>3</sub>)

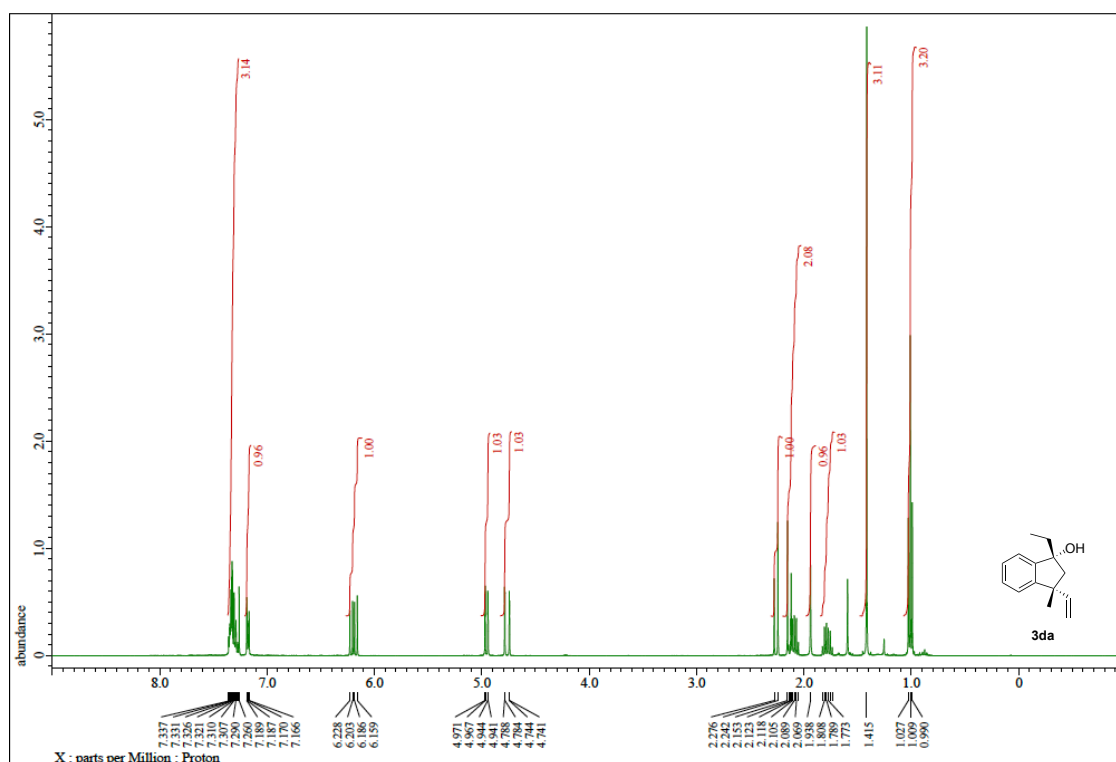

### <sup>13</sup>C NMR of 3da (100 MHz, CDCl<sub>3</sub>)

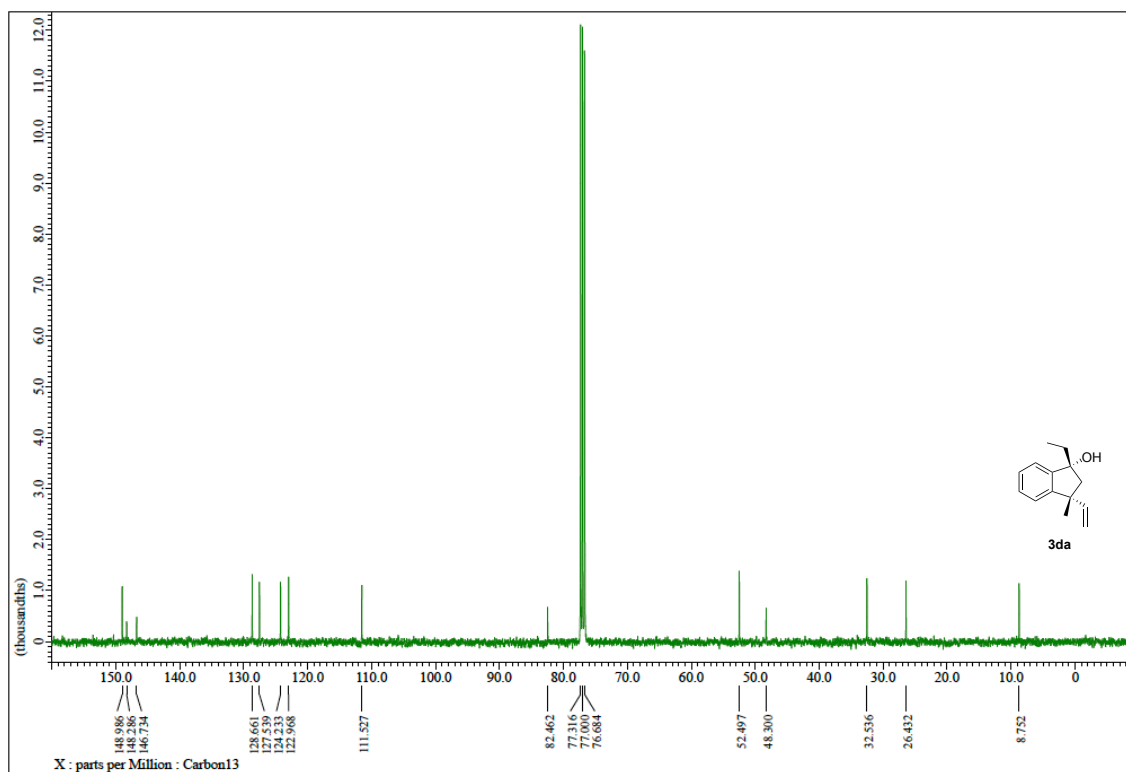

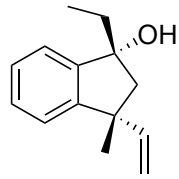

**3da**

**HPLC chart of (*rac*)-3da**

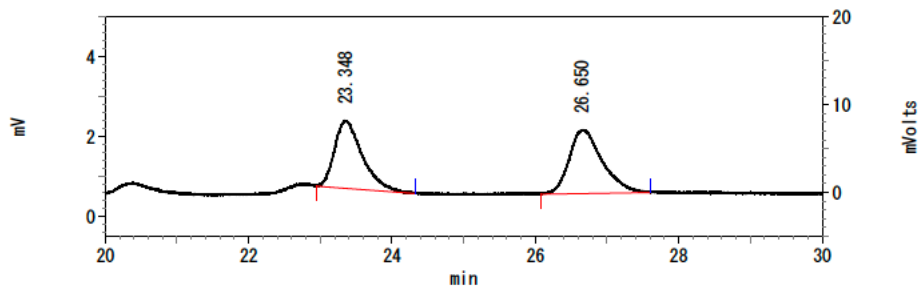

| Pk # | Retention Time | Area  | Area Percent |
|------|----------------|-------|--------------|
| 1    | 23.348         | 45846 | 47.076       |
| 2    | 26.650         | 51542 | 52.924       |

**HPLC chart of (1*R*,3*R*)-3da**

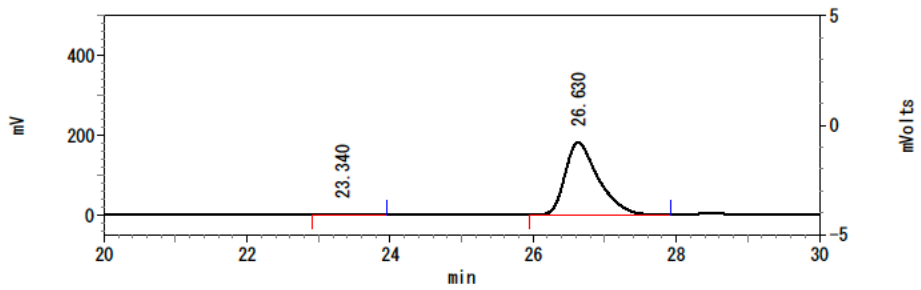

| Pk # | Retention Time | Area    | Area Percent |
|------|----------------|---------|--------------|
| 1    | 23.340         | 16726   | 0.287        |
| 2    | 26.630         | 5817702 | 99.713       |

### <sup>1</sup>H NMR of 3ea (400 MHz, CDCl<sub>3</sub>)

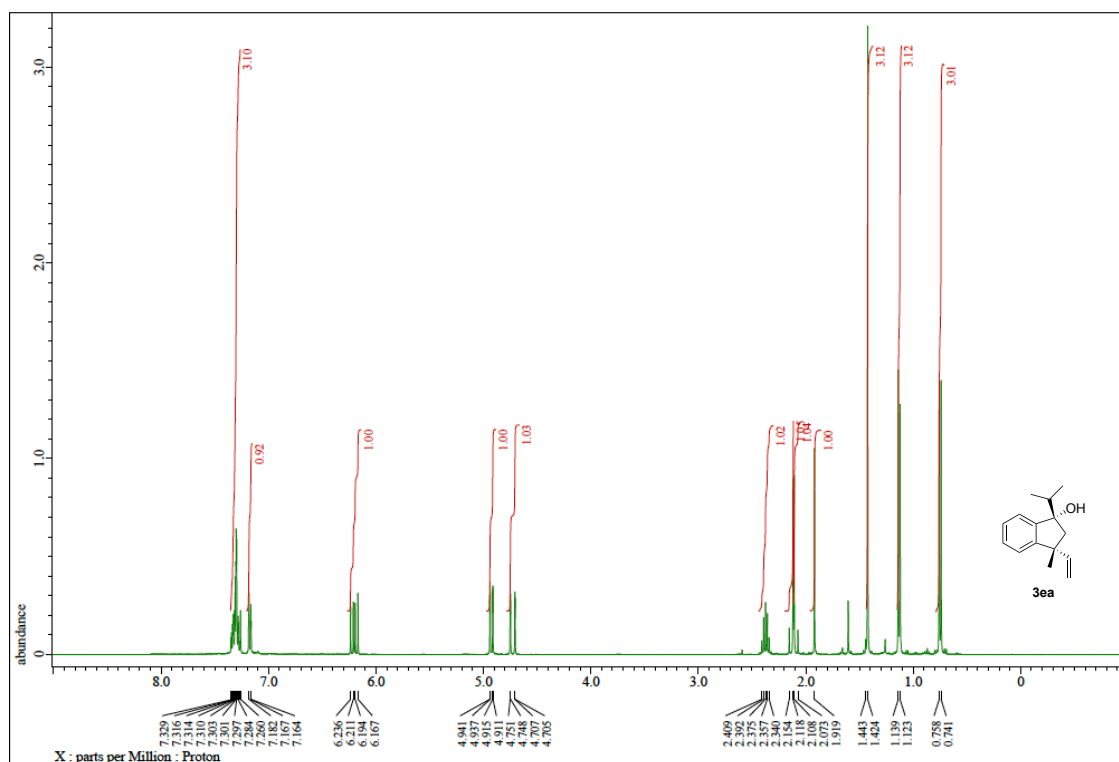

### <sup>13</sup>C NMR of 3ea (100 MHz, CDCl<sub>3</sub>)

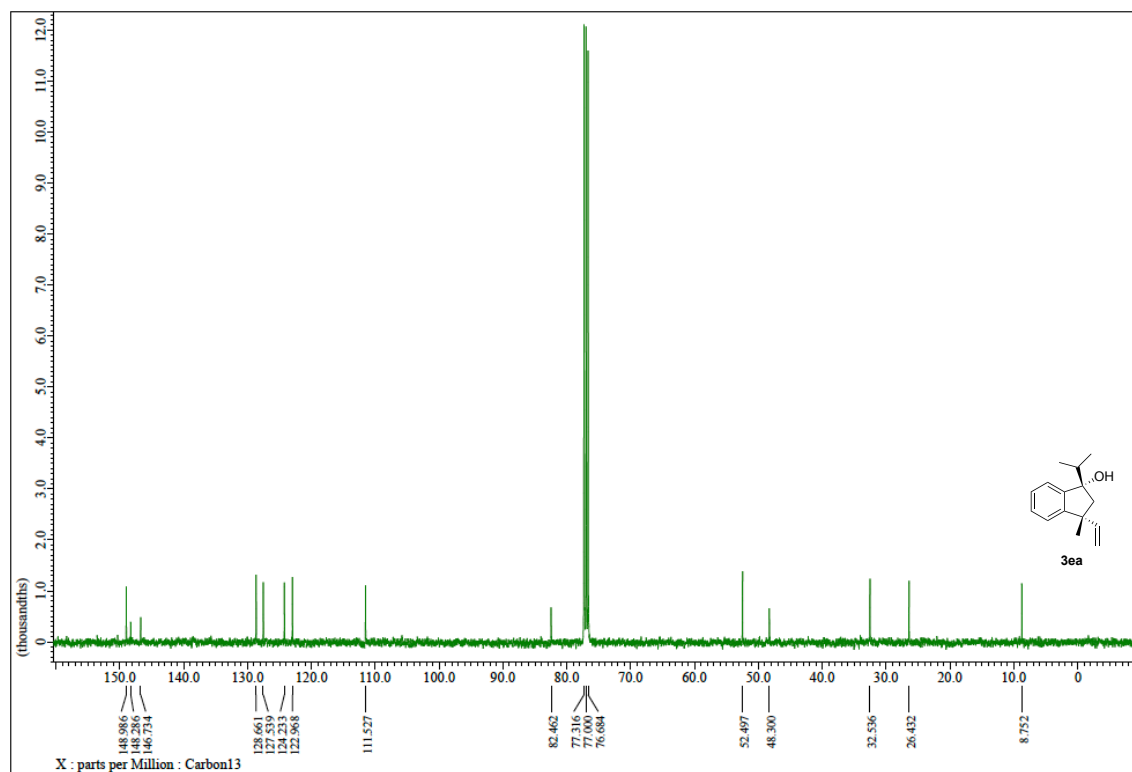

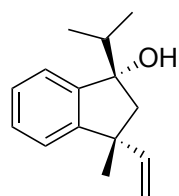

**3ea**

**HPLC chart of (*rac*)-3ea**

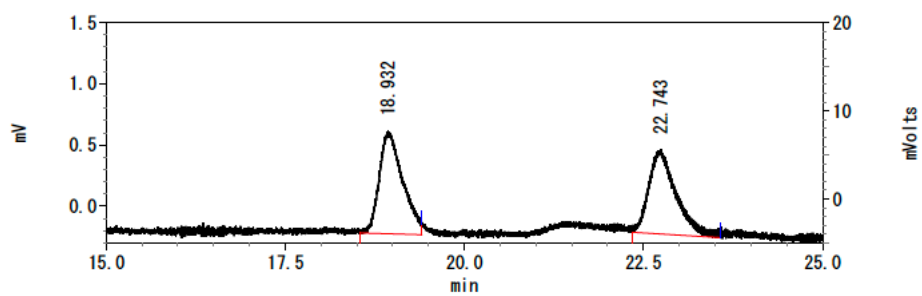

| Pk # | Retention Time | Area  | Area Percent |
|------|----------------|-------|--------------|
| 1    | 18.932         | 18806 | 51.076       |
| 2    | 22.743         | 18014 | 48.924       |

**HPLC chart of (*1S,3R*)-3ea**

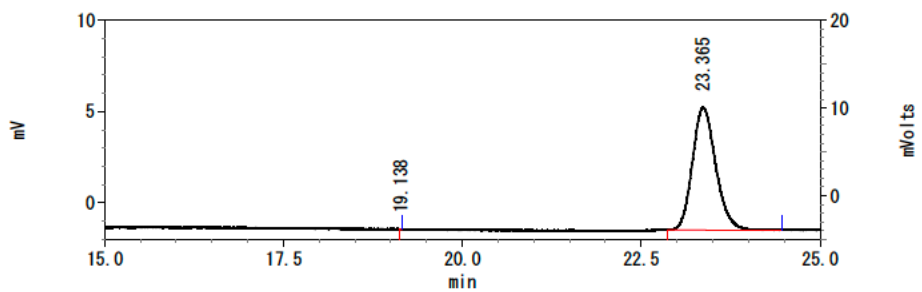

| Pk # | Retention Time | Area   | Area Percent |
|------|----------------|--------|--------------|
| 1    | 19.138         | 21     | 0.014        |
| 2    | 23.365         | 153196 | 99.986       |



### <sup>1</sup>H NMR of 3fa (400 MHz, CDCl<sub>3</sub>)

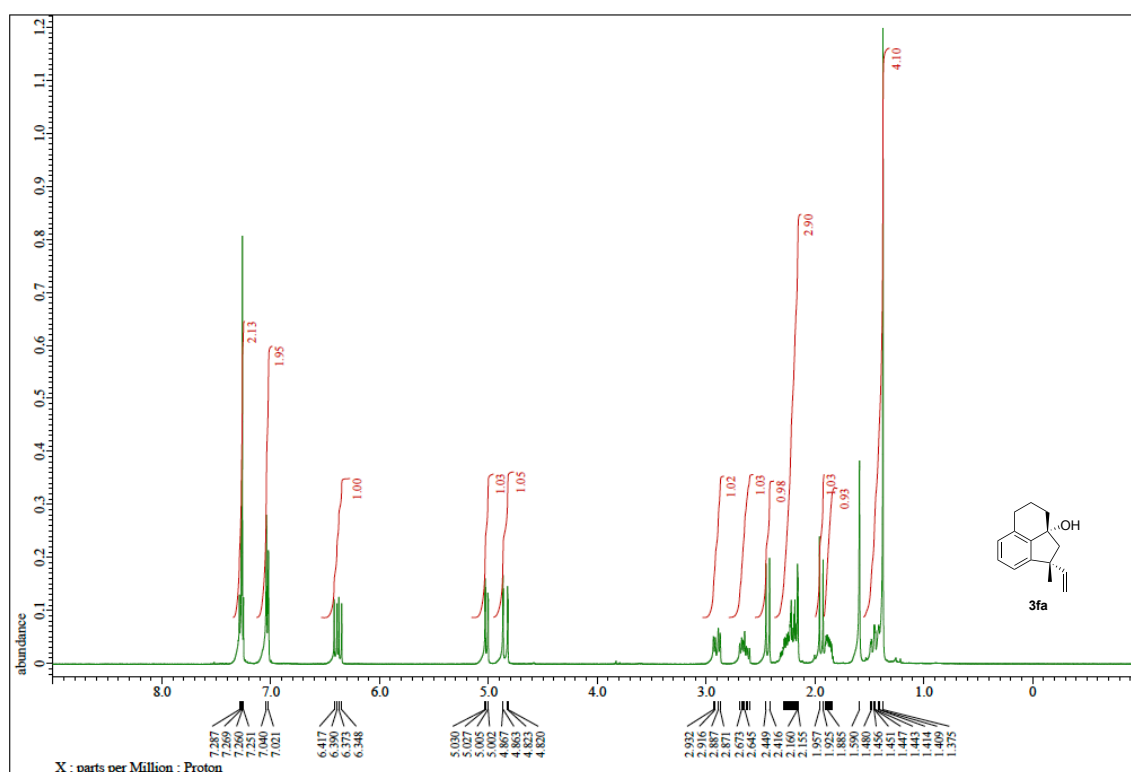

### <sup>13</sup>C NMR of 3fa (100 MHz, CDCl<sub>3</sub>)

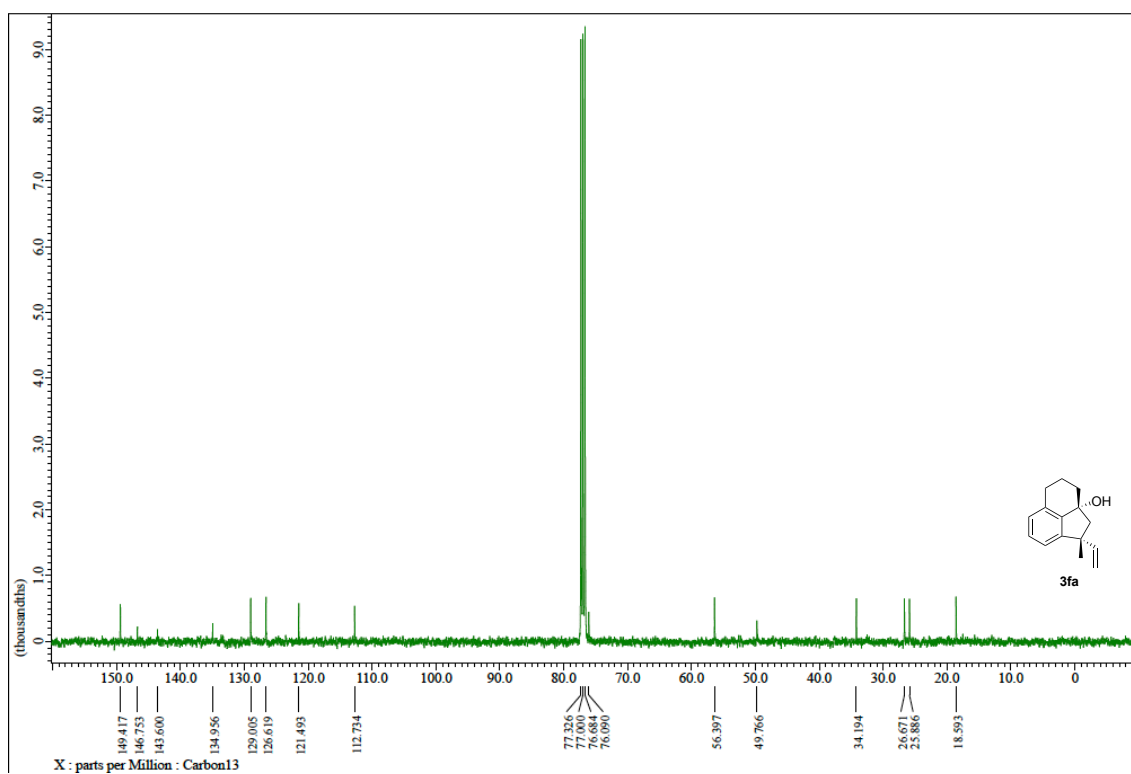

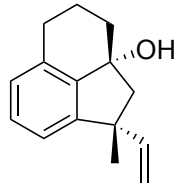

**3fa**

**HPLC chart of (*rac*)-3fa**

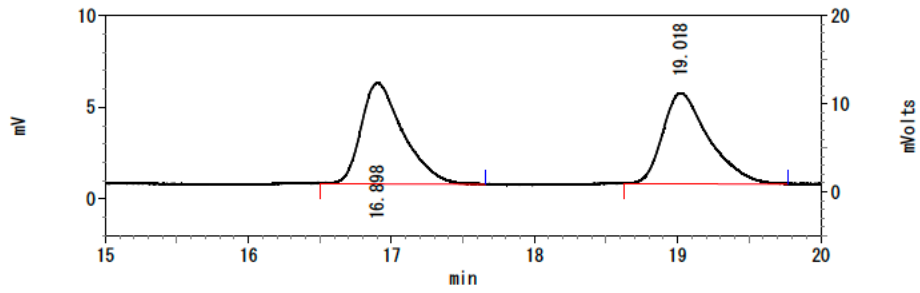

| Pk # | Retention Time | Area   | Area Percent |
|------|----------------|--------|--------------|
| 1    | 16.898         | 112883 | 50.366       |
| 2    | 19.018         | 111243 | 49.634       |

**HPLC chart of (1*R*,3*R*)-3fa**

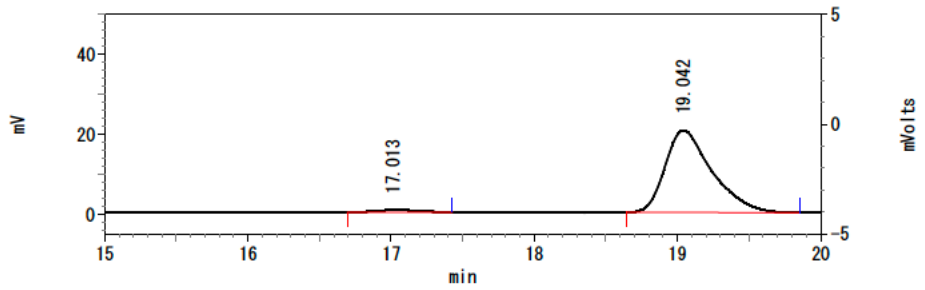

| Pk # | Retention Time | Area   | Area Percent |
|------|----------------|--------|--------------|
| 1    | 17.013         | 12112  | 2.532        |
| 2    | 19.042         | 466194 | 97.468       |

### <sup>1</sup>H NMR of 3ga (400 MHz, CDCl<sub>3</sub>)

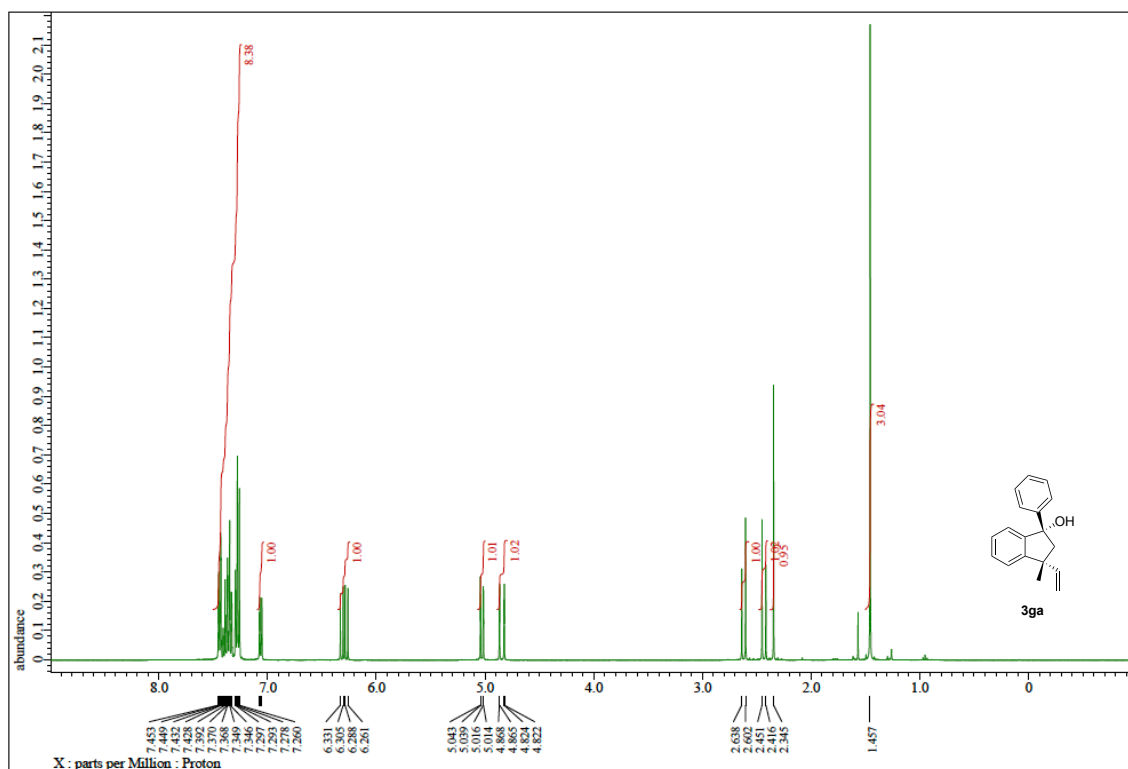

### <sup>13</sup>C NMR of 3ga (100 MHz, CDCl<sub>3</sub>)

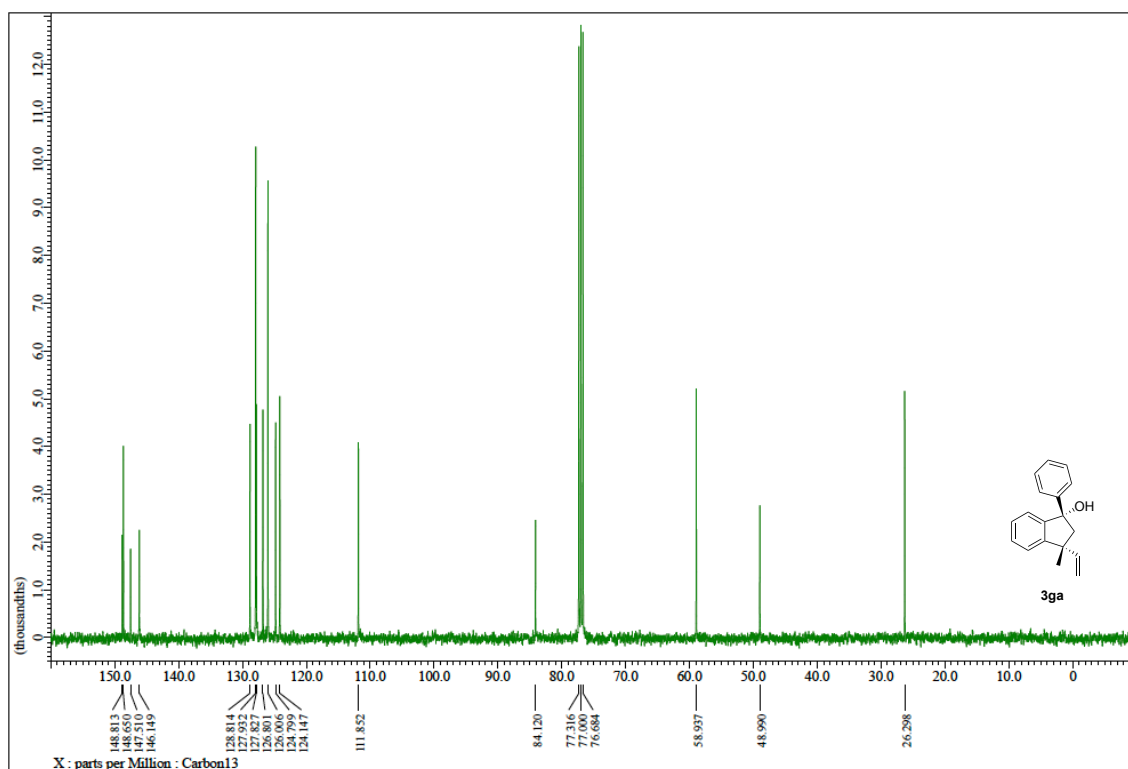

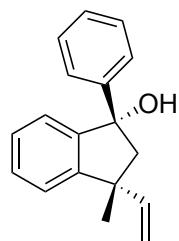

**3ga**

**HPLC chart of (*rac*)-3ga**

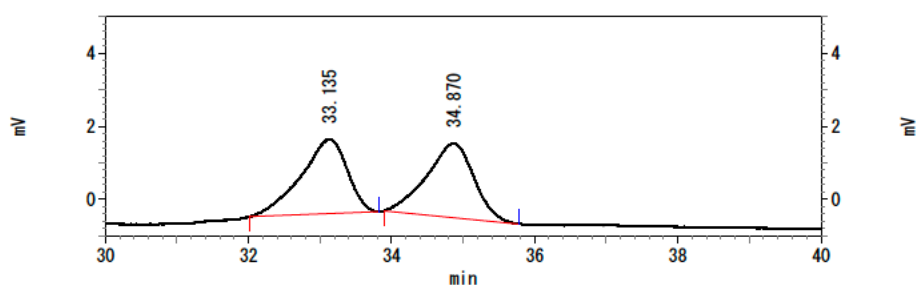

| Pk # | Retention Time | Area  | Area Percent |
|------|----------------|-------|--------------|
| 1    | 33.135         | 91479 | 49.495       |
| 2    | 34.870         | 93347 | 50.505       |

**HPLC chart of (*1S,3R*)-3ga**

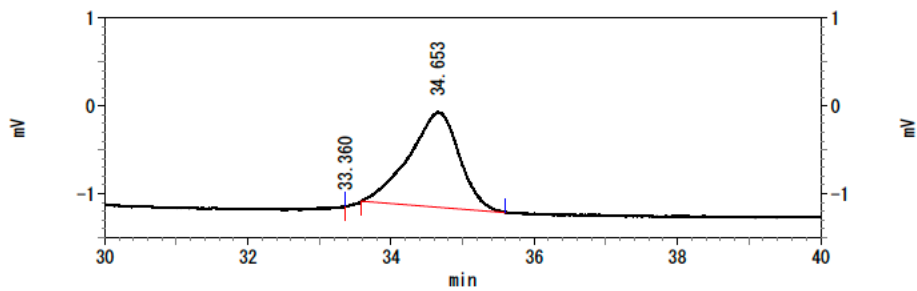

| Pk # | Retention Time | Area  | Area Percent |
|------|----------------|-------|--------------|
| 1    | 33.360         | 0     | 0.000        |
| 2    | 34.653         | 52882 | 100.000      |

### <sup>1</sup>H NMR of 3ha (400 MHz, CDCl<sub>3</sub>)

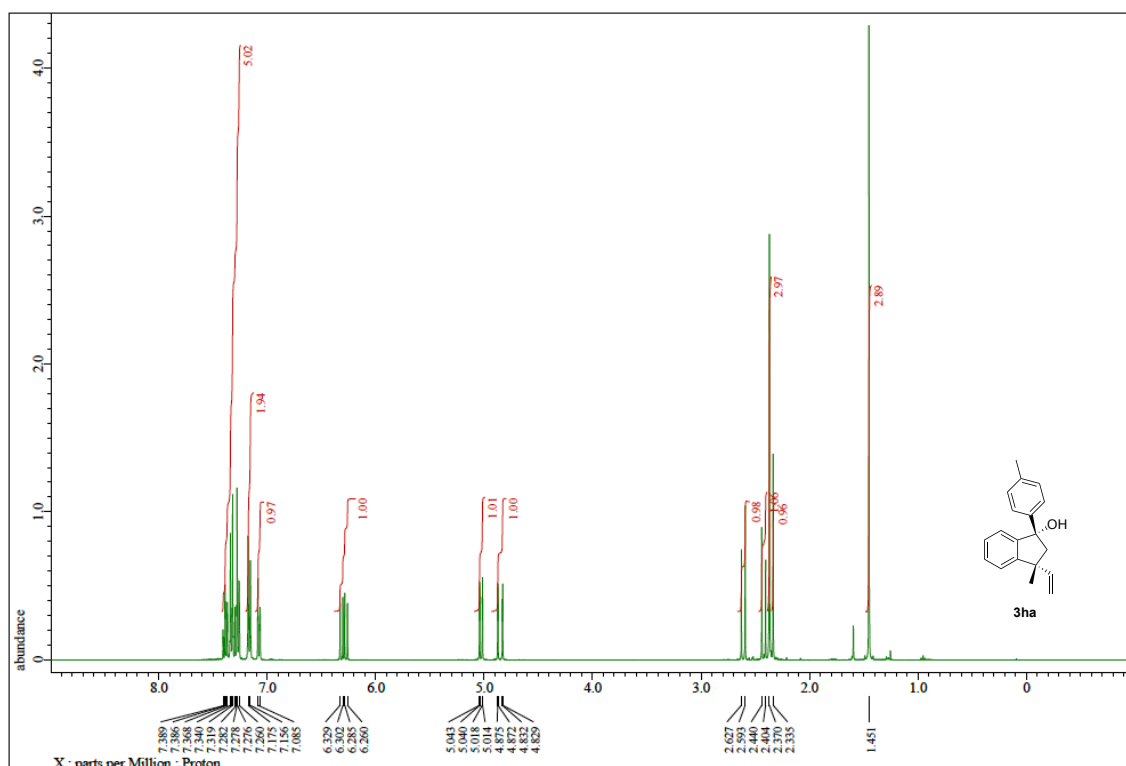

### <sup>13</sup>C NMR of 3ha (100 MHz, CDCl<sub>3</sub>)

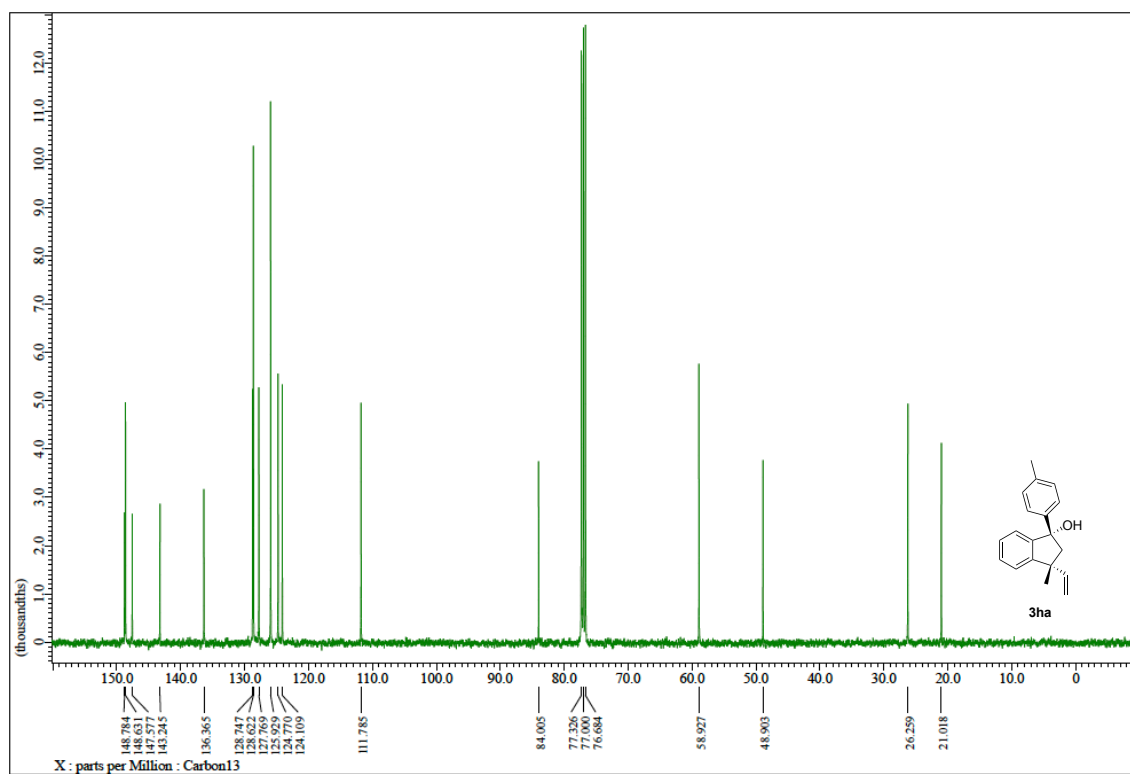

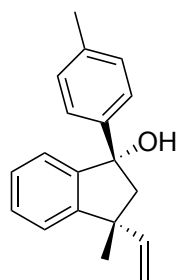

**3ha**

**HPLC chart of (*rac*)-3ha**

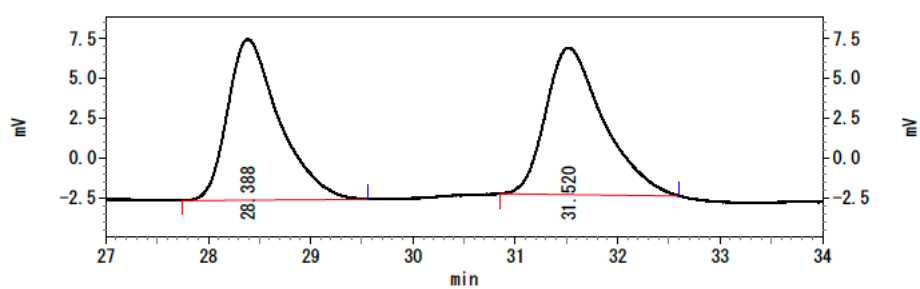

| Pk # | Retention Time | Area   | Area Percent |
|------|----------------|--------|--------------|
| 1    | 28.388         | 353965 | 49.393       |
| 2    | 31.520         | 362670 | 50.607       |

**HPLC chart of (*1S,3R*)-3ha**

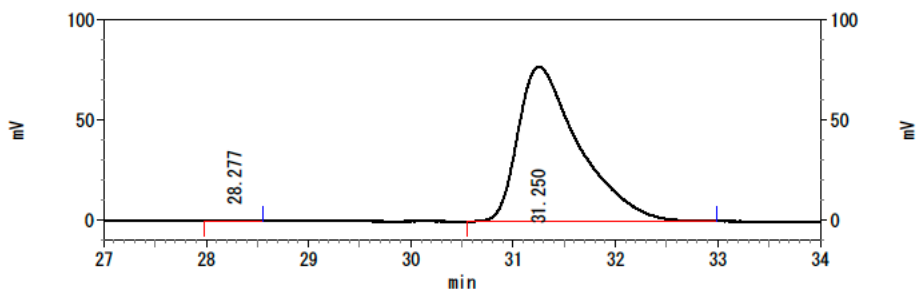

| Pk # | Retention Time | Area    | Area Percent |
|------|----------------|---------|--------------|
| 1    | 28.277         | 3512    | 0.110        |
| 2    | 31.250         | 3192909 | 99.890       |

### <sup>1</sup>H NMR of 3ia (400 MHz, CDCl<sub>3</sub>)

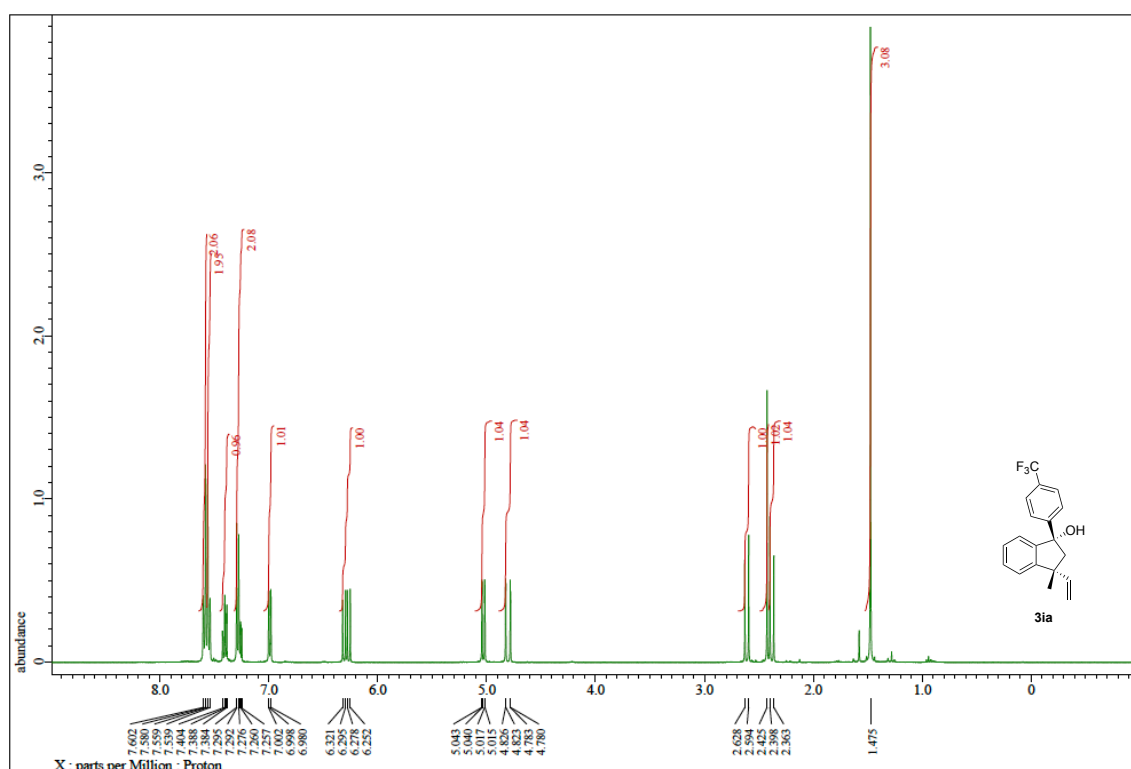

### <sup>13</sup>C NMR of 3ia (100 MHz, CD<sub>3</sub>COCD<sub>3</sub>, overview)

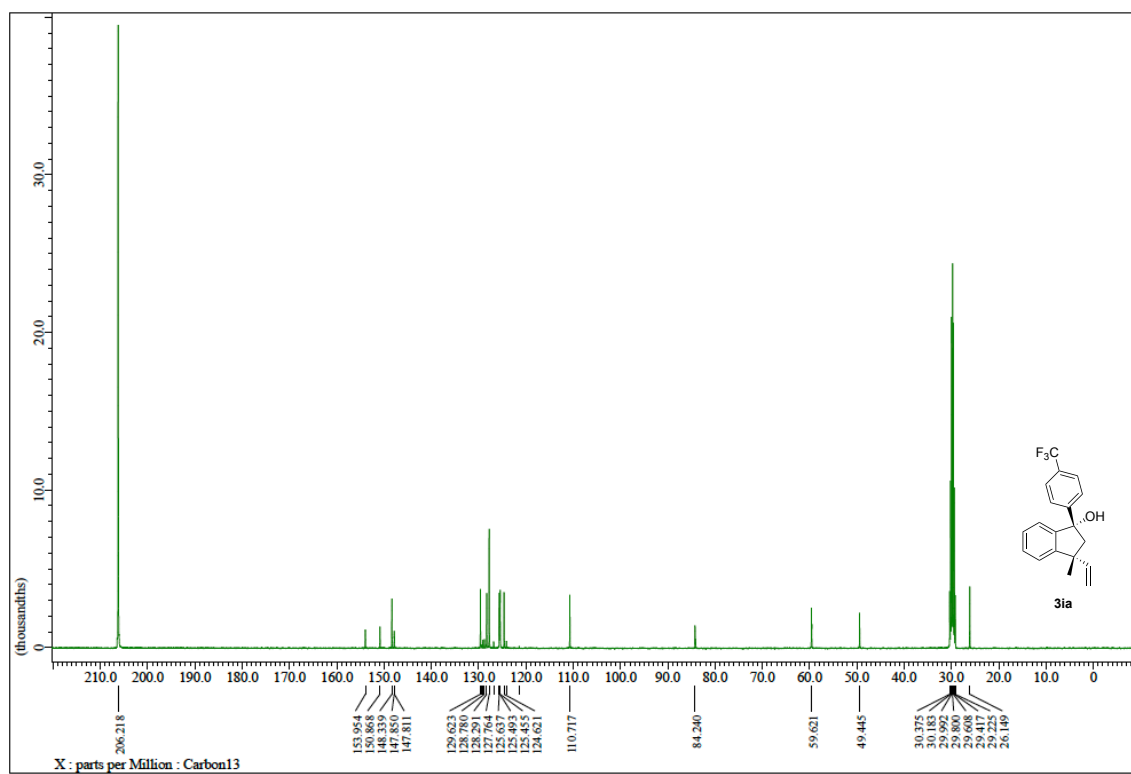

(160 ppm-116 ppm)

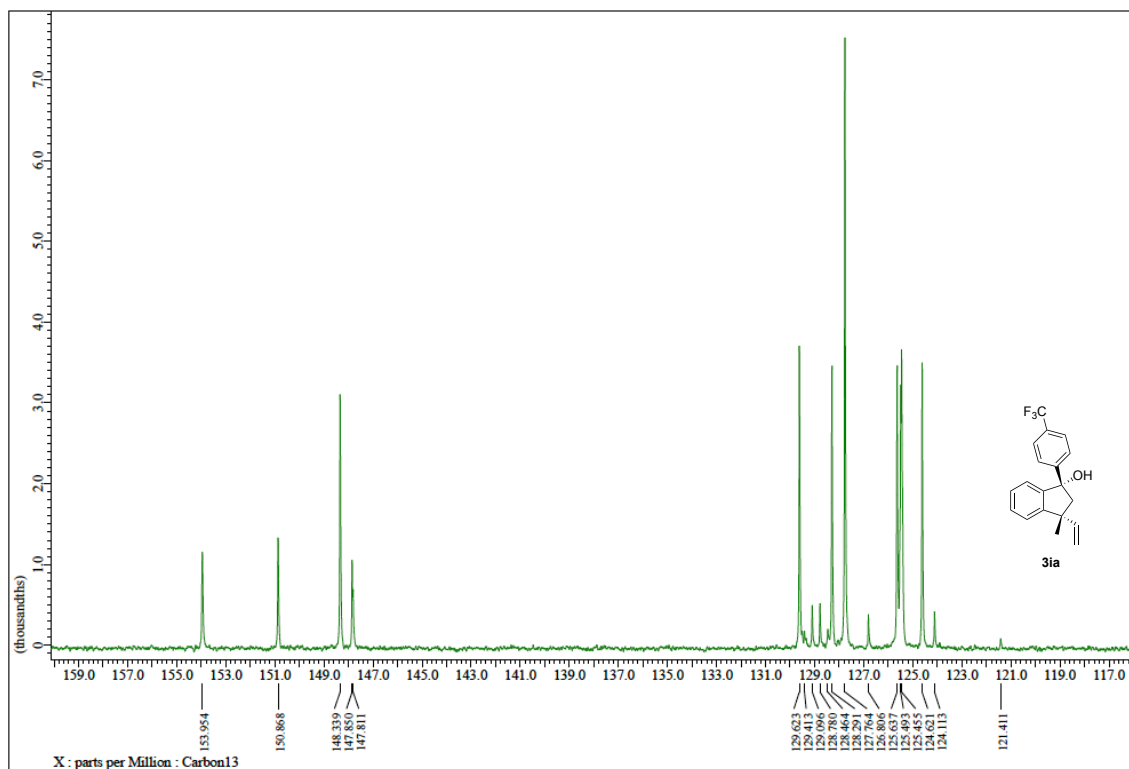



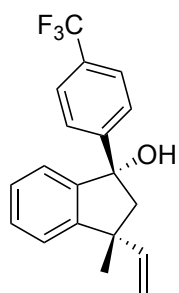

**3ia**

**HPLC chart of (rac)-3ia**

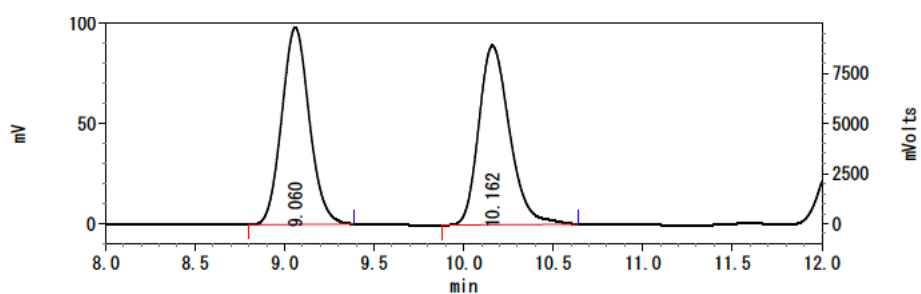

| Pk # | Retention Time | Area    | Area Percent |
|------|----------------|---------|--------------|
| 1    | 9.060          | 1052105 | 49.556       |
| 2    | 10.162         | 1070952 | 50.444       |

**HPLC chart of (1S,3R)-3ia**

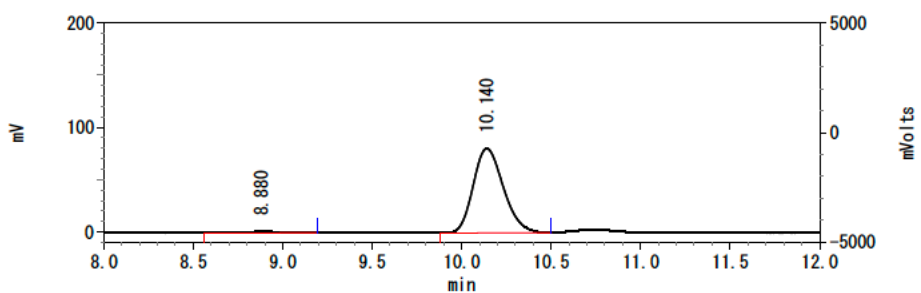

| Pk # | Retention Time | Area   | Area Percent |
|------|----------------|--------|--------------|
| 1    | 8.880          | 24947  | 2.567        |
| 2    | 10.140         | 946770 | 97.433       |

### <sup>1</sup>H NMR of 3ja (400 MHz, CDCl<sub>3</sub>)

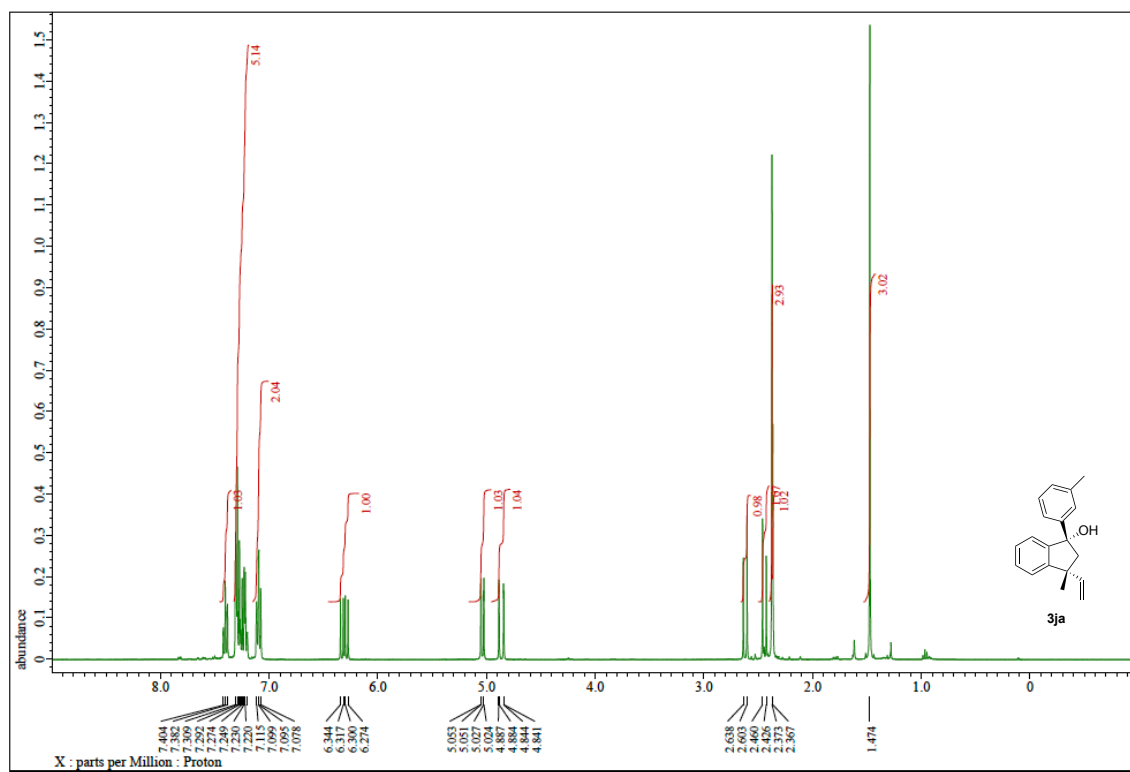

### <sup>13</sup>C NMR of 3ja (100 MHz, CDCl<sub>3</sub>)

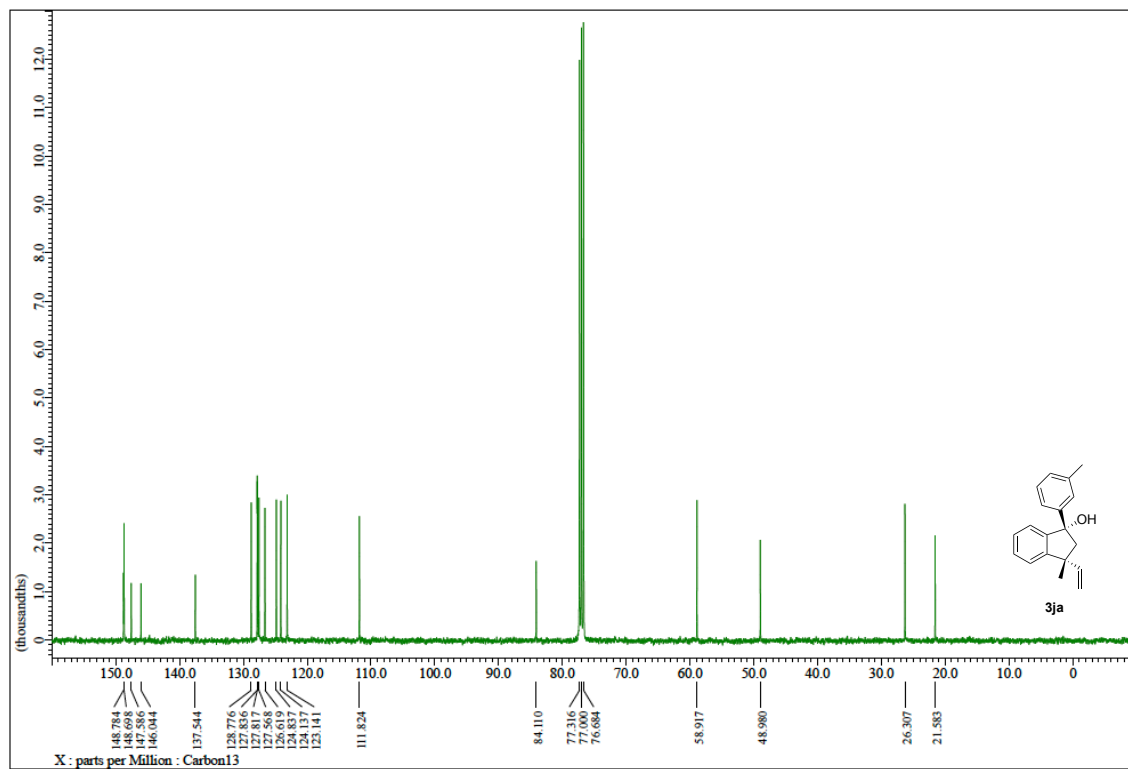

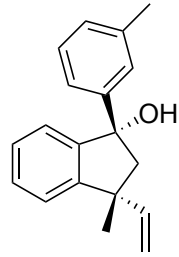

3ja

### HPLC chart of (rac)-3ja

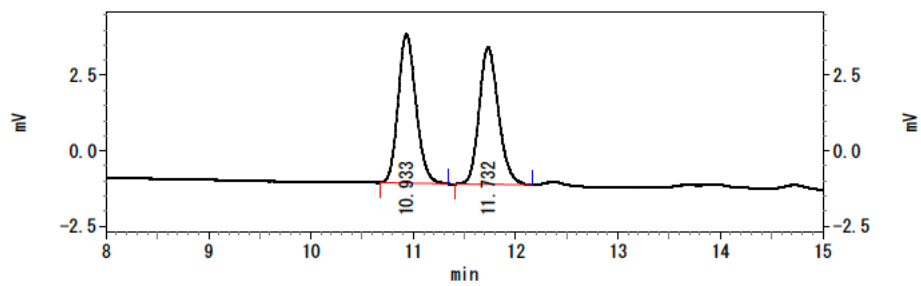

| Pk # | Retention Time | Area  | Area Percent |
|------|----------------|-------|--------------|
| 1    | 10.933         | 59853 | 50.145       |
| 2    | 11.732         | 59507 | 49.855       |

### HPLC chart of (1S,3R)-3ja

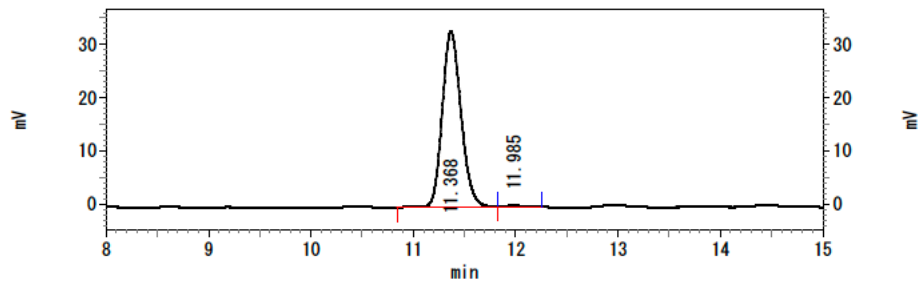

| Pk # | Retention Time | Area   | Area Percent |
|------|----------------|--------|--------------|
| 1    | 11.368         | 421262 | 99.148       |
| 2    | 11.985         | 3620   | 0.852        |

### <sup>1</sup>H NMR of 3ka (400 MHz, CDCl<sub>3</sub>)

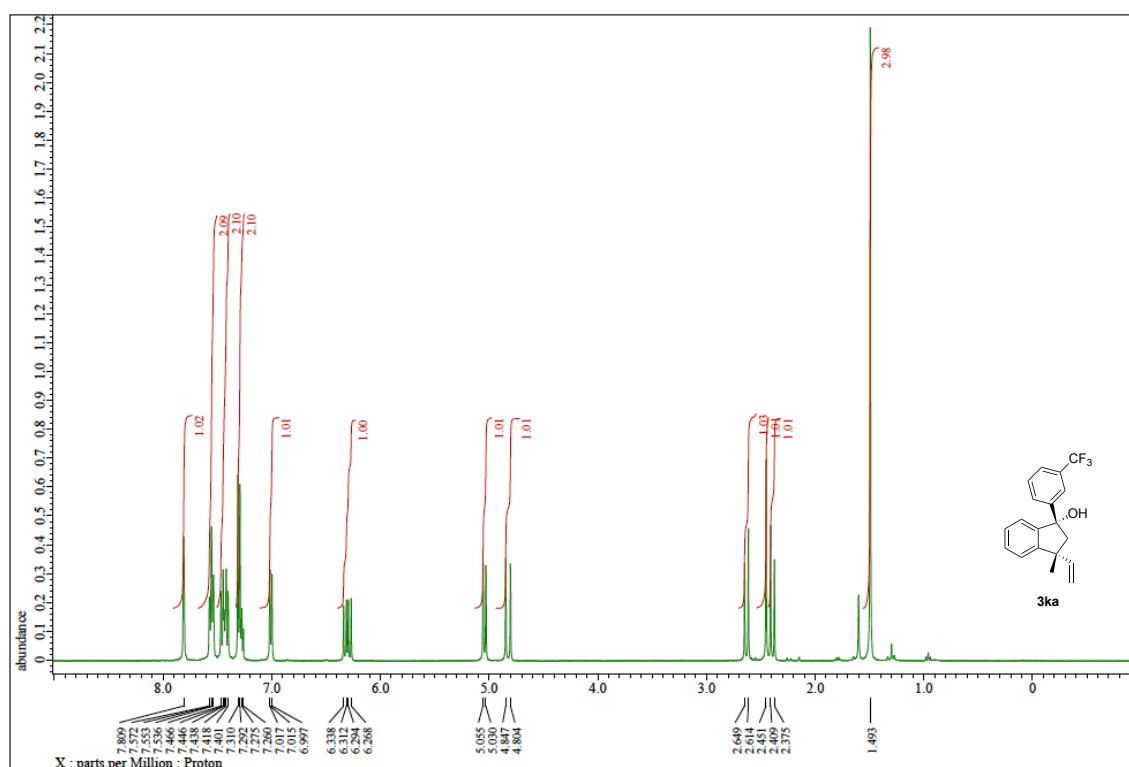

### <sup>13</sup>C NMR of 3ka (100 MHz, CDCl<sub>3</sub>, overview)

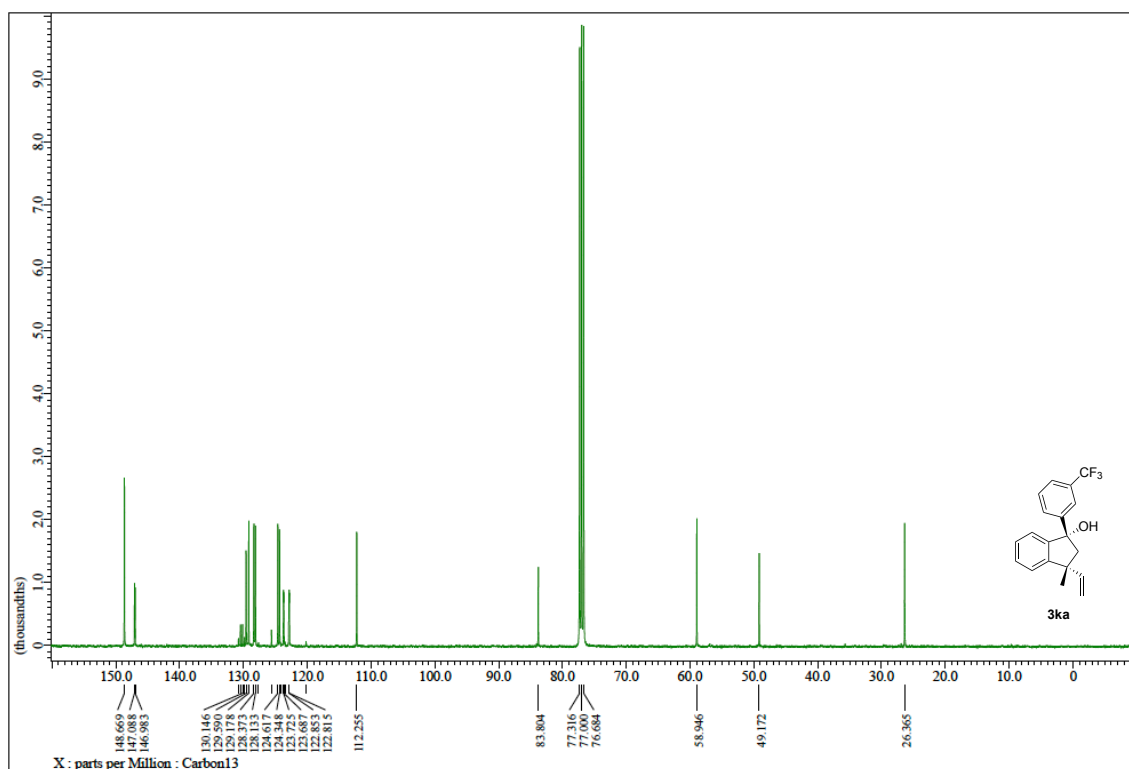

(160 ppm-116 ppm)

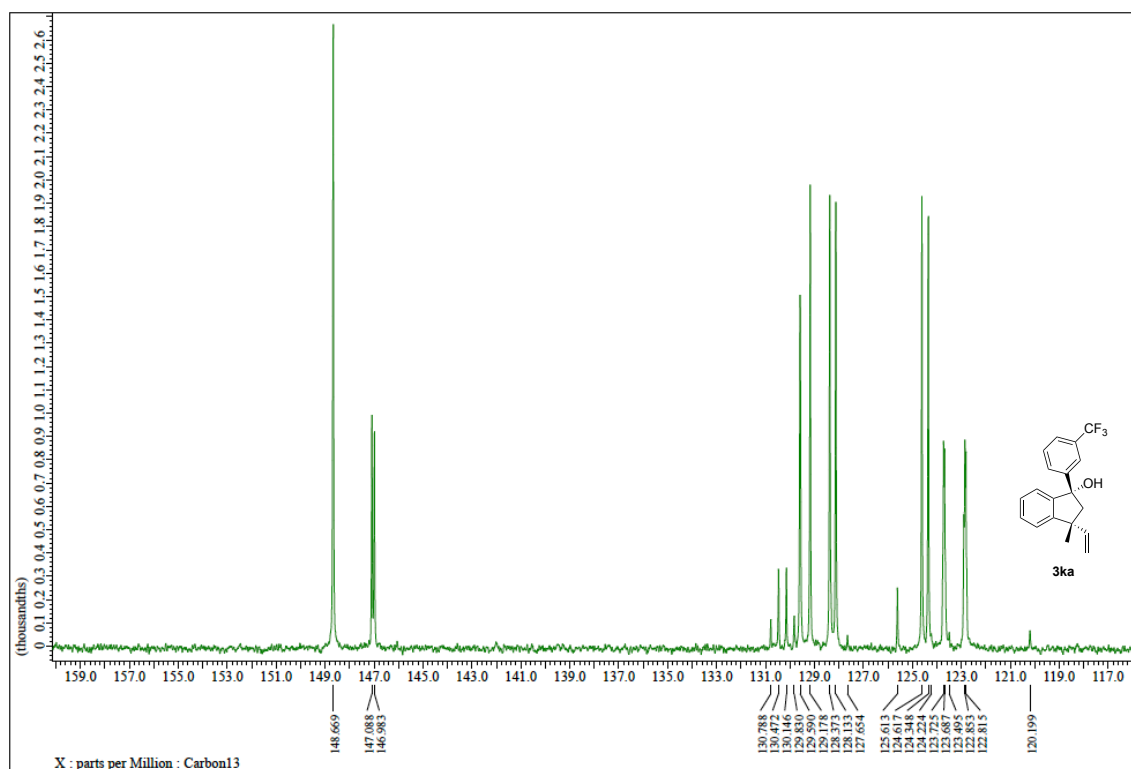

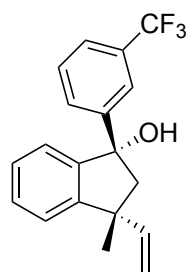

**3ka**

**HPLC chart of (*rac*)-3ka**

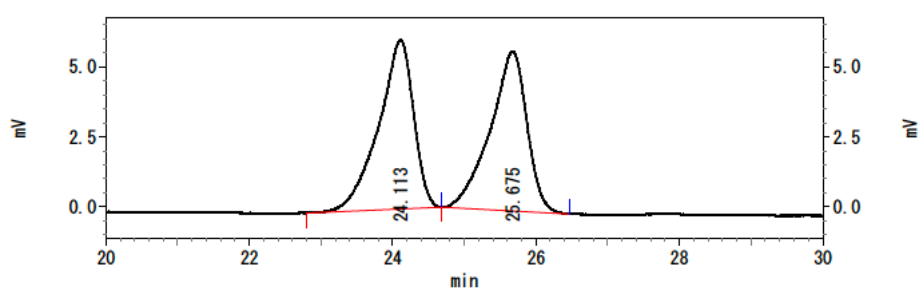

| Pk # | Retention Time | Area   | Area Percent |
|------|----------------|--------|--------------|
| 1    | 24.113         | 203998 | 50.165       |
| 2    | 25.675         | 202658 | 49.835       |

**HPLC chart of (1*S*,3*R*)-3ka**

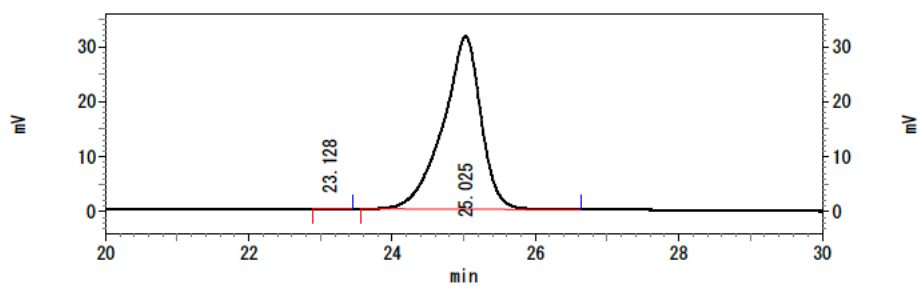

| Pk # | Retention Time | Area    | Area Percent |
|------|----------------|---------|--------------|
| 1    | 23.128         | 462     | 0.040        |
| 2    | 25.025         | 1159753 | 99.960       |

### <sup>1</sup>H NMR of 3la (400 MHz, CDCl<sub>3</sub>)

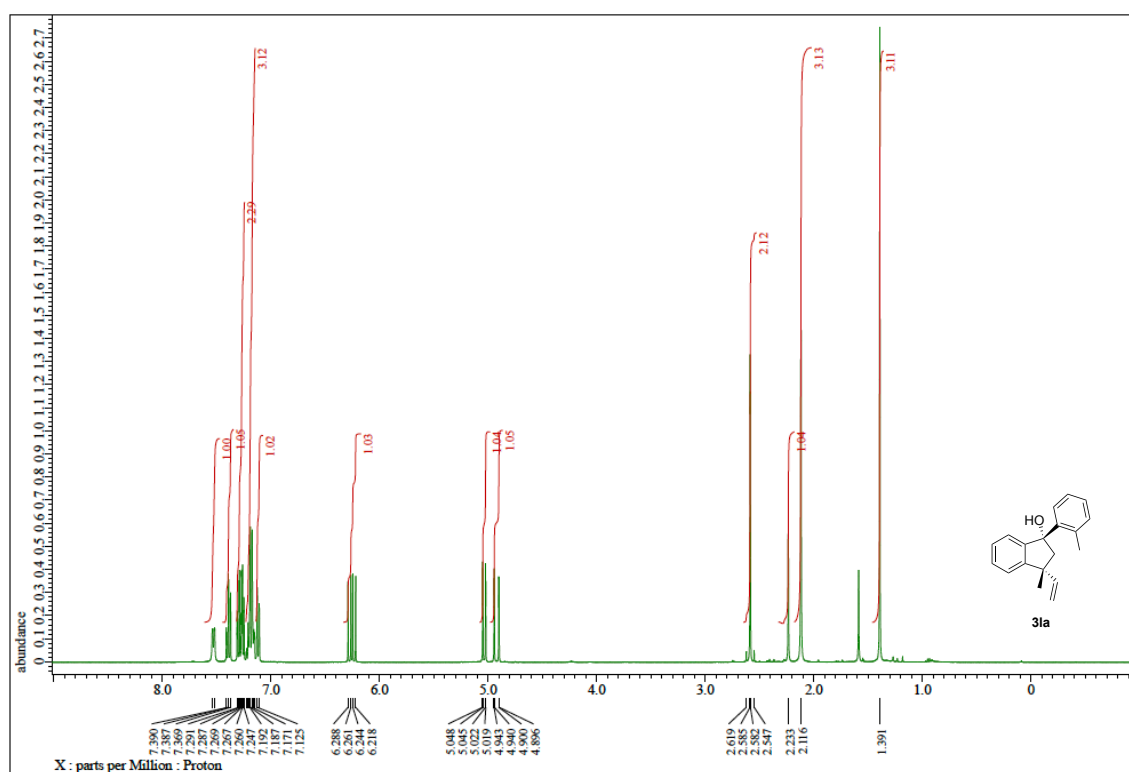

### <sup>13</sup>C NMR of 3la (100 MHz, CDCl<sub>3</sub>)

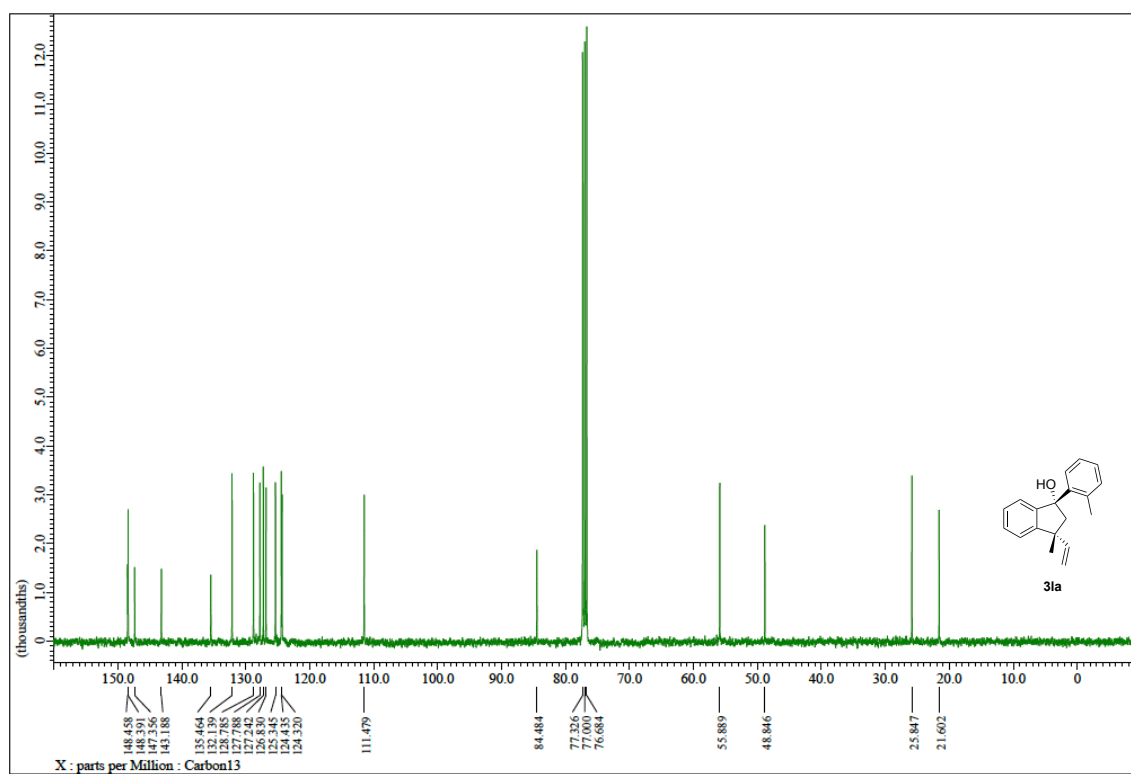



**3la**

**HPLC chart of (*rac*)-3la**

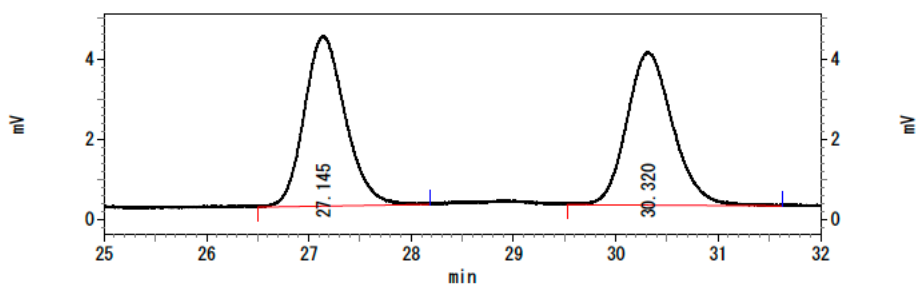

| Pk # | Retention Time | Area   | Area Percent |
|------|----------------|--------|--------------|
| 1    | 27.145         | 118199 | 49.840       |
| 2    | 30.320         | 118959 | 50.160       |

**HPLC chart of (1*S*,3*R*)-3la**

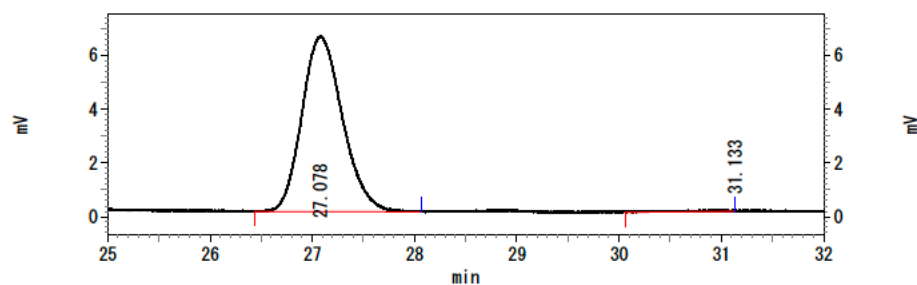

| Pk # | Retention Time | Area   | Area Percent |
|------|----------------|--------|--------------|
| 1    | 27.078         | 180599 | 99.090       |
| 2    | 31.133         | 1659   | 0.910        |



### <sup>1</sup>H NMR of 3ma (400 MHz, CDCl<sub>3</sub>)

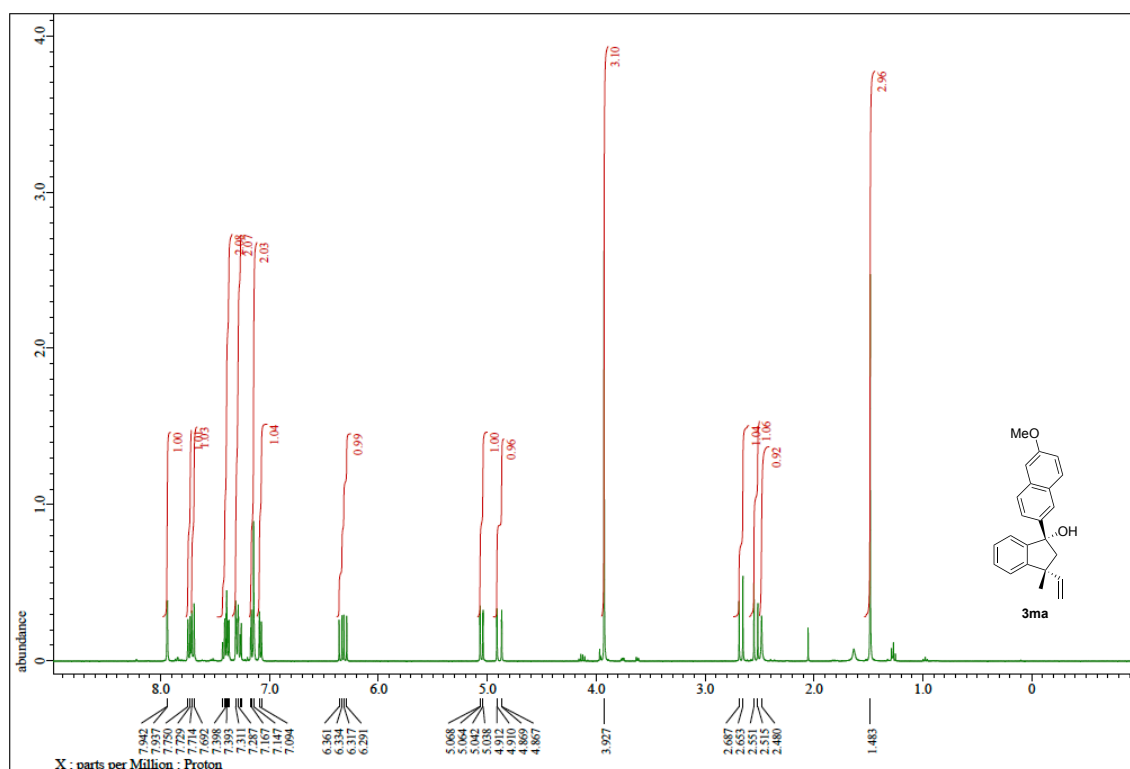

### <sup>13</sup>C NMR of 3ma (100 MHz, CDCl<sub>3</sub>)

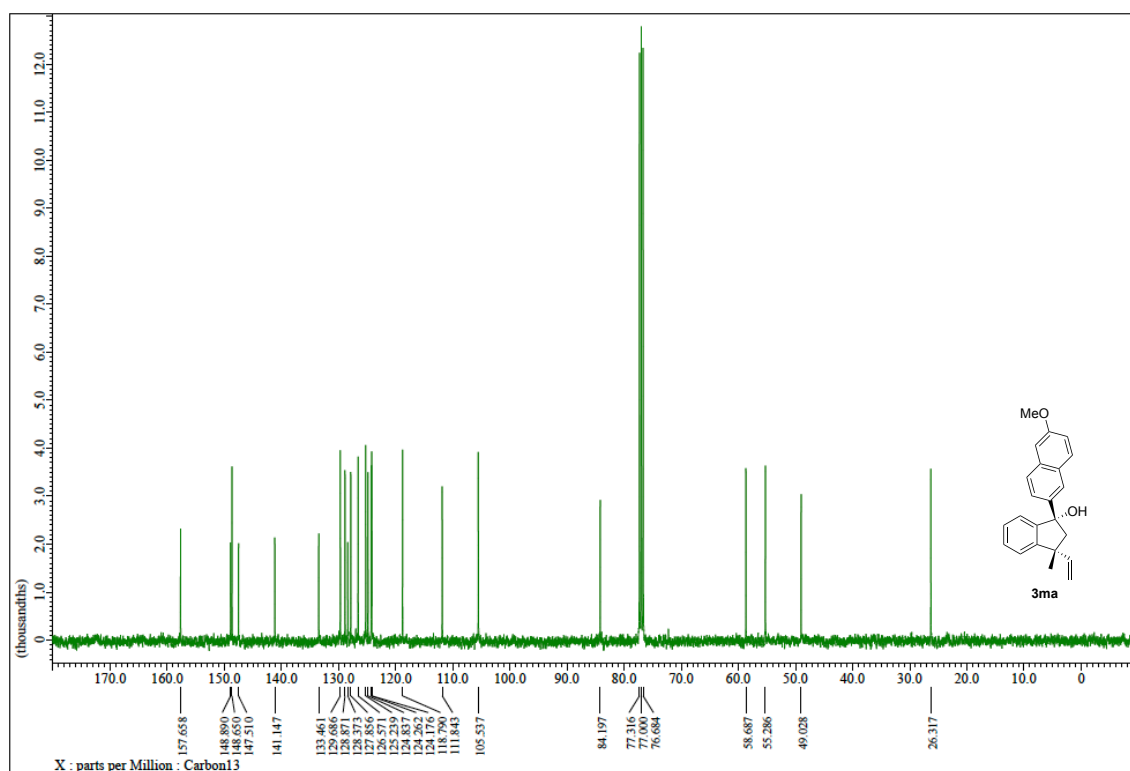

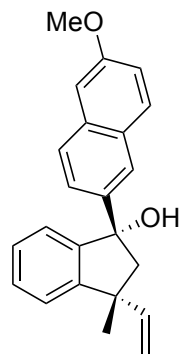

**3ma**

**HPLC chart of (*rac*)-3ma**

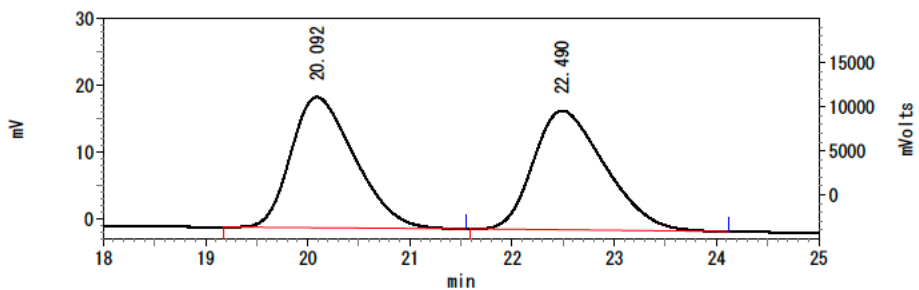

| Pk # | Retention Time | Area   | Area Percent |
|------|----------------|--------|--------------|
| 1    | 20.092         | 848663 | 49.408       |
| 2    | 22.490         | 868989 | 50.592       |

**HPLC chart of (1*S*,3*R*)-3ma**

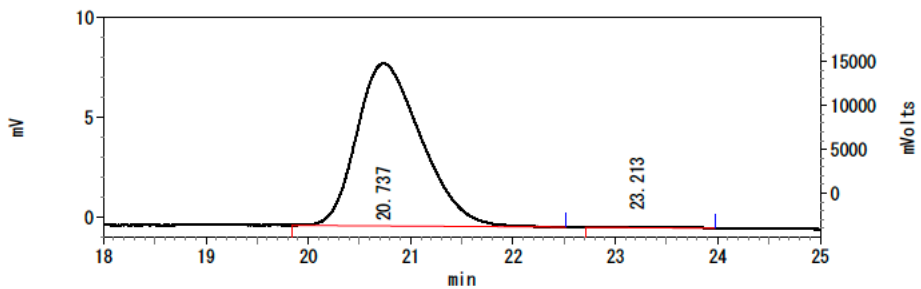

| Pk # | Retention Time | Area   | Area Percent |
|------|----------------|--------|--------------|
| 1    | 20.737         | 356480 | 99.361       |
| 2    | 23.213         | 2292   | 0.639        |

### <sup>1</sup>H NMR of 3gb (400 MHz, CDCl<sub>3</sub>)

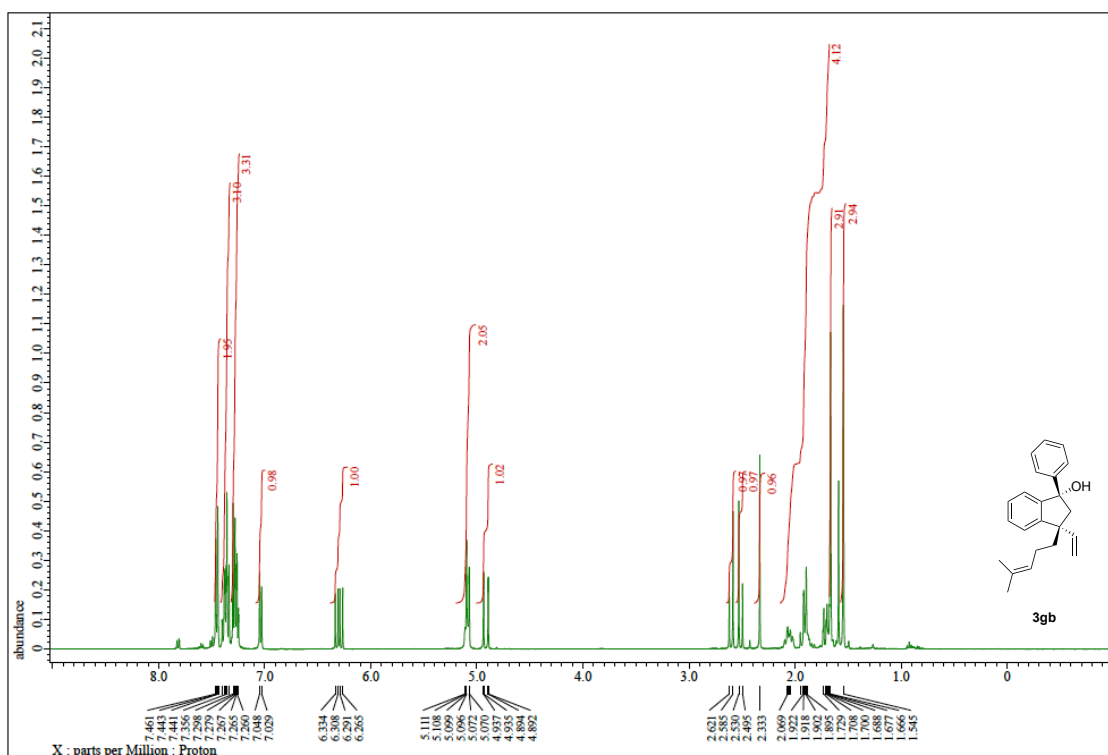

### <sup>13</sup>C NMR of 3gb (100 MHz, CDCl<sub>3</sub>)

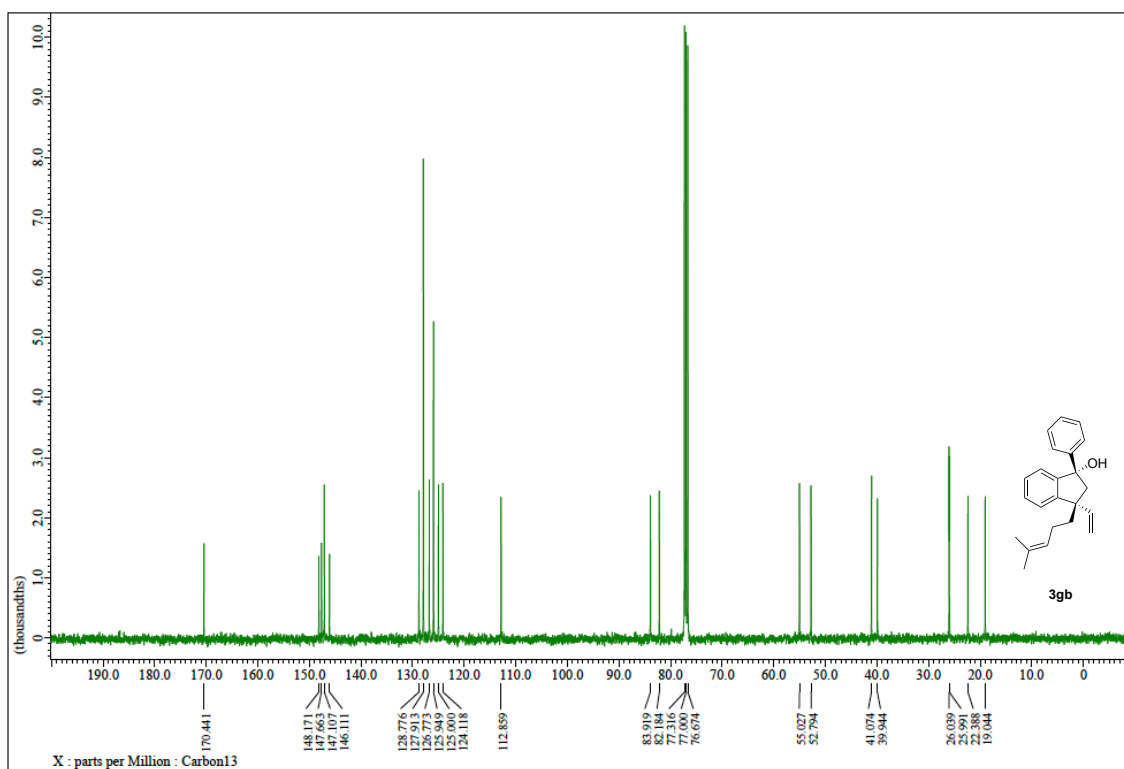

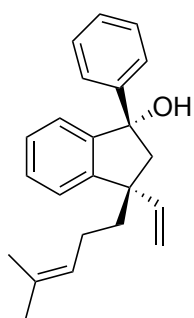

**3gb**

**HPLC chart of (*rac*)-3gb**

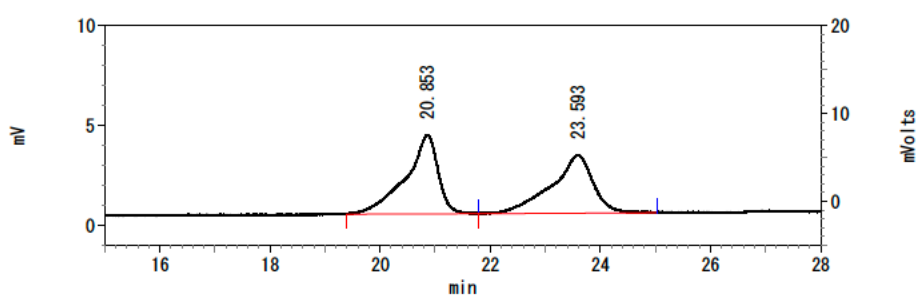

| Pk # | Retention Time | Area   | Area Percent |
|------|----------------|--------|--------------|
| 1    | 20.853         | 162082 | 51.357       |
| 2    | 23.593         | 153518 | 48.643       |

**HPLC chart of (*1S,3R*)-3gb**

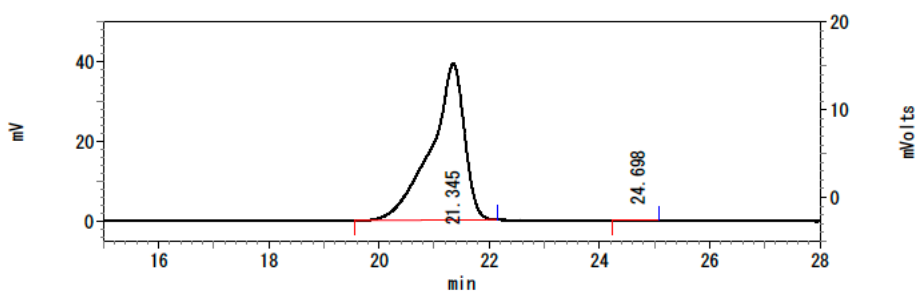

| Pk # | Retention Time | Area    | Area Percent |
|------|----------------|---------|--------------|
| 1    | 21.345         | 1652959 | 99.911       |
| 2    | 24.698         | 1475    | 0.089        |

### <sup>1</sup>H NMR of 3gc (400 MHz, CDCl<sub>3</sub>)

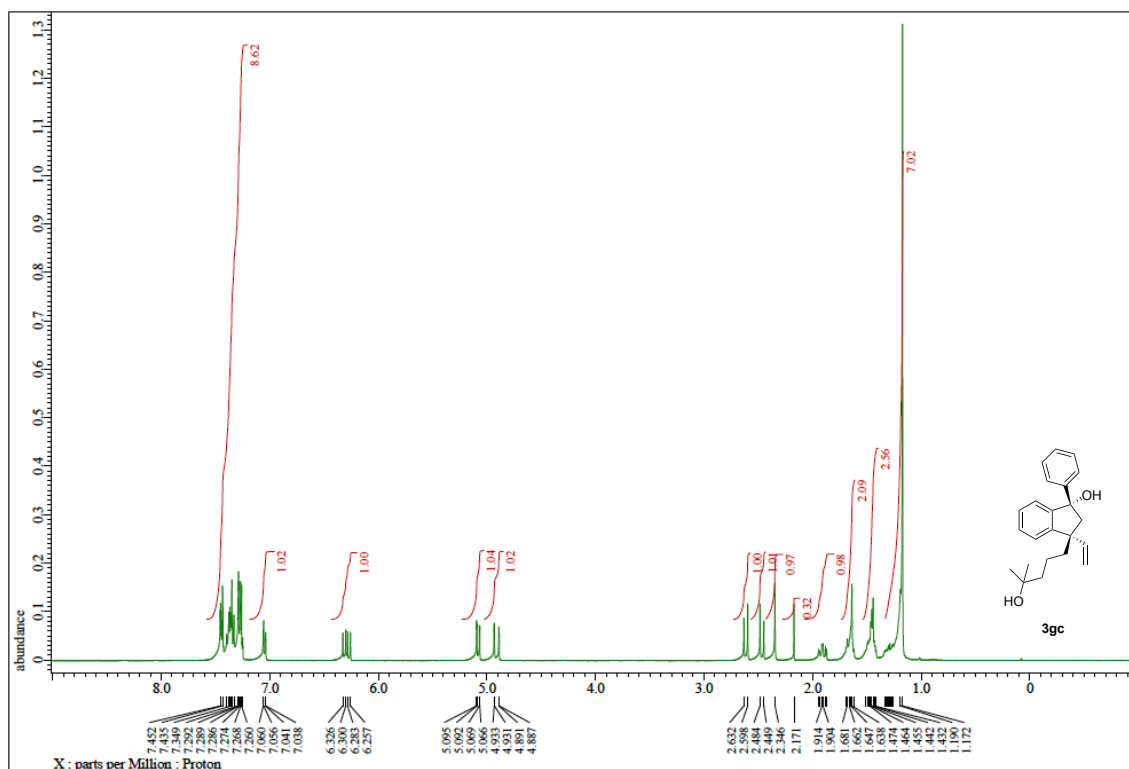

### <sup>13</sup>C NMR of 3gc (100 MHz, CDCl<sub>3</sub>)

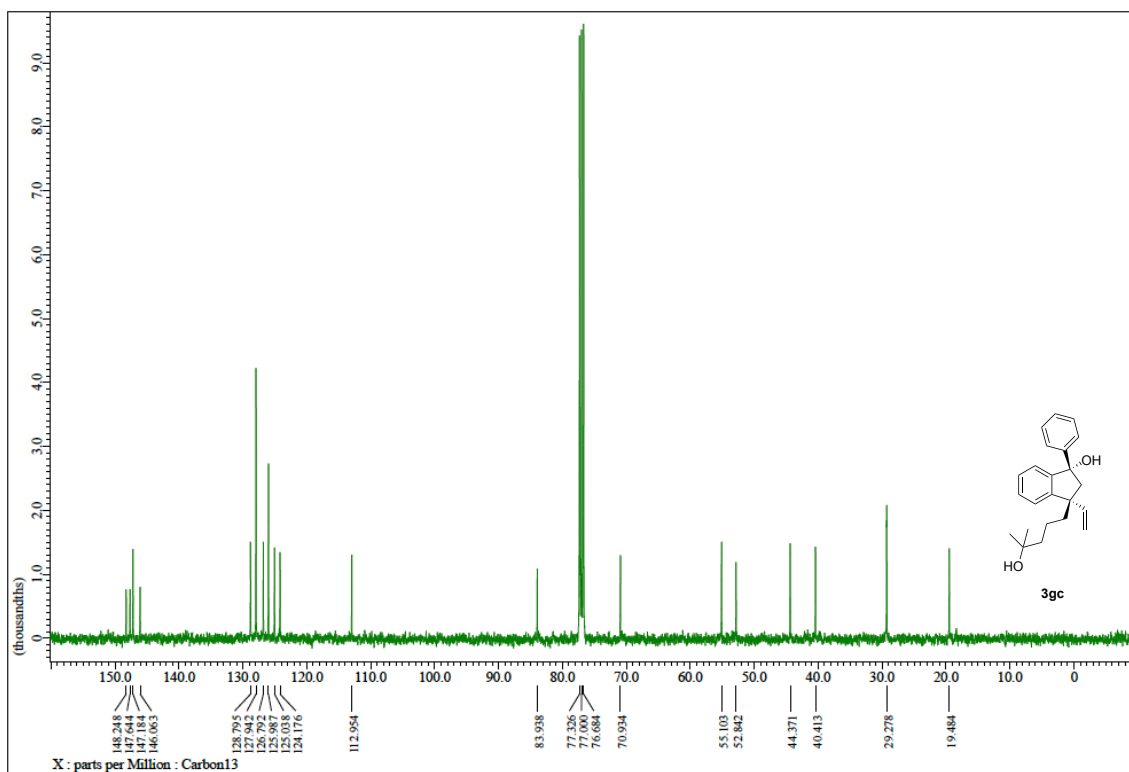

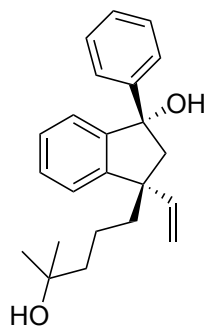

**3gc**

**HPLC chart of (*rac*)-3gc**

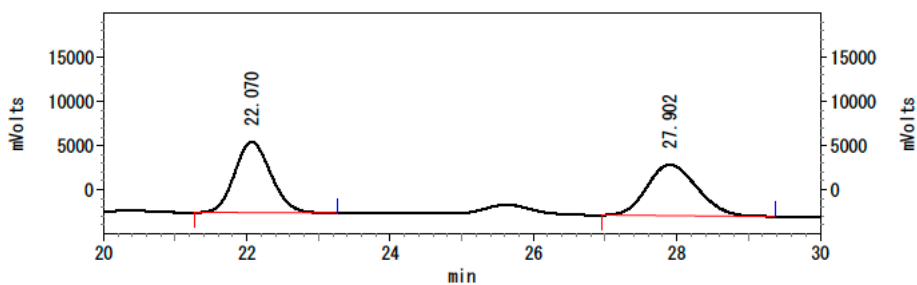

| Pk # | Retention Time | Area   | Area Percent |
|------|----------------|--------|--------------|
| 1    | 22.070         | 282164 | 50.066       |
| 2    | 27.902         | 281415 | 49.934       |

**HPLC chart of (1*R*,3*R*)-3gc**

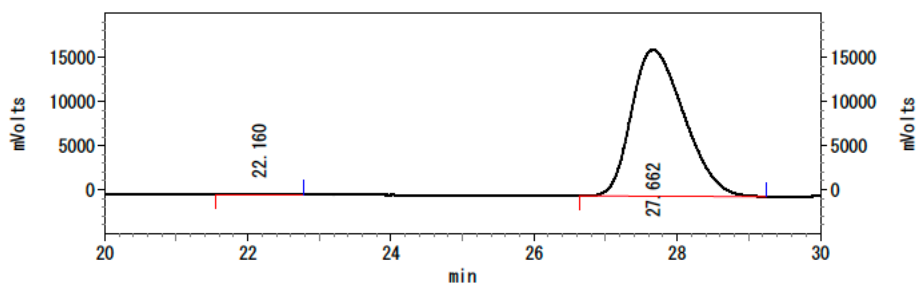

| Pk # | Retention Time | Area   | Area Percent |
|------|----------------|--------|--------------|
| 1    | 22.160         | 1693   | 0.199        |
| 2    | 27.662         | 849611 | 99.801       |

### <sup>1</sup>H NMR of 3gd (400 MHz, CDCl<sub>3</sub>)

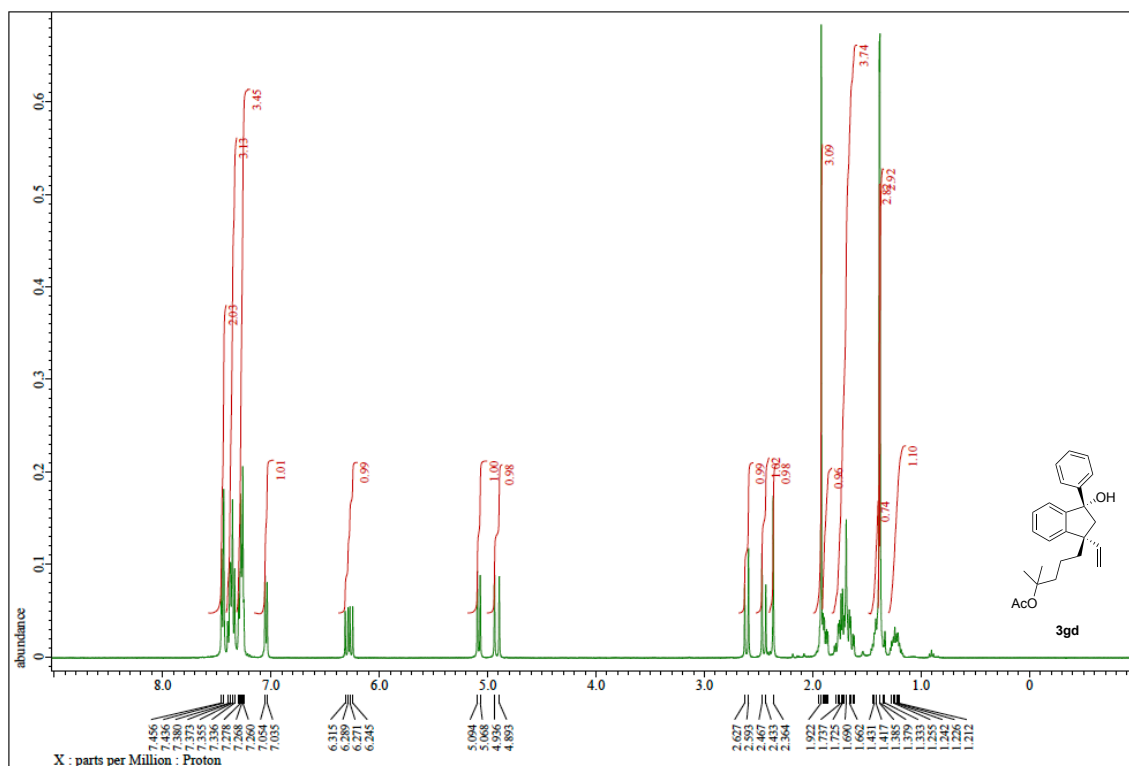

### <sup>13</sup>C NMR of 3gd (100 MHz, CDCl<sub>3</sub>)

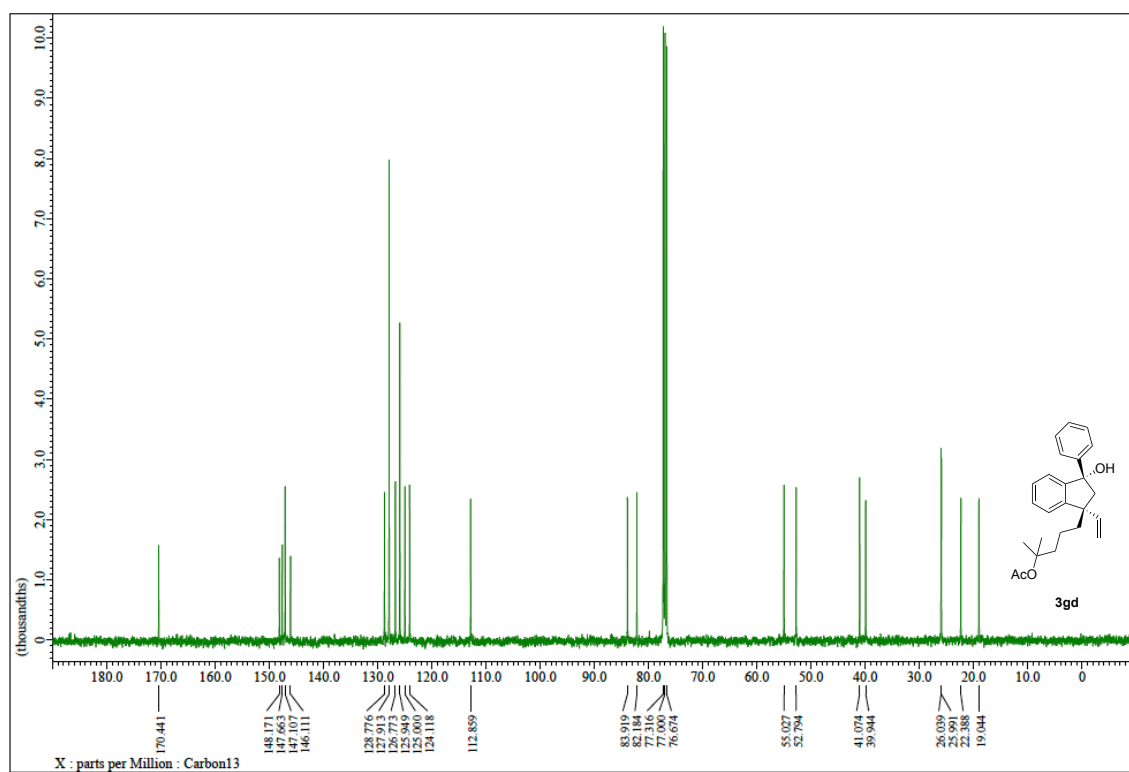

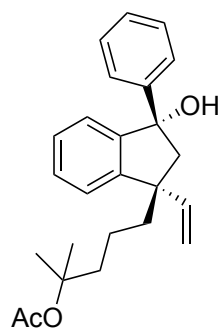

**3gd**

**HPLC chart of (*rac*)-3gd**

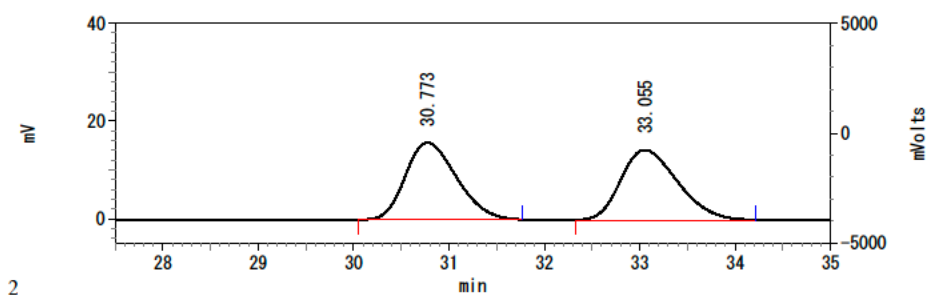

2

| Pk # | Retention Time | Area   | Area Percent |
|------|----------------|--------|--------------|
| 1    | 30.773         | 589013 | 49.823       |
| 2    | 33.055         | 593197 | 50.177       |

**HPLC chart of (1*R*,3*R*)-3gd**

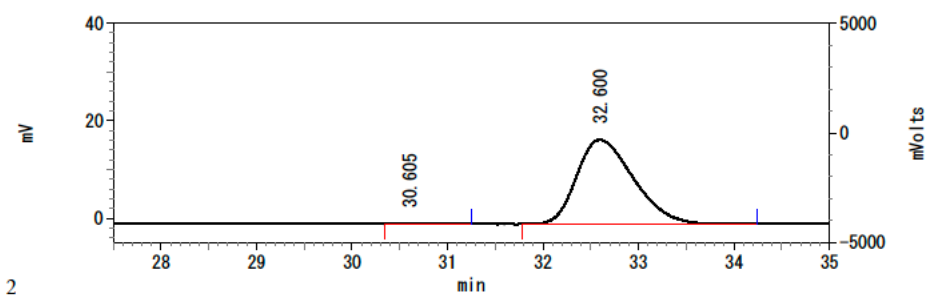

2

| Pk # | Retention Time | Area   | Area Percent |
|------|----------------|--------|--------------|
| 1    | 30.605         | 1149   | 0.160        |
| 2    | 32.600         | 717600 | 99.840       |



### <sup>1</sup>H NMR of 3ge (400 MHz, CDCl<sub>3</sub>)

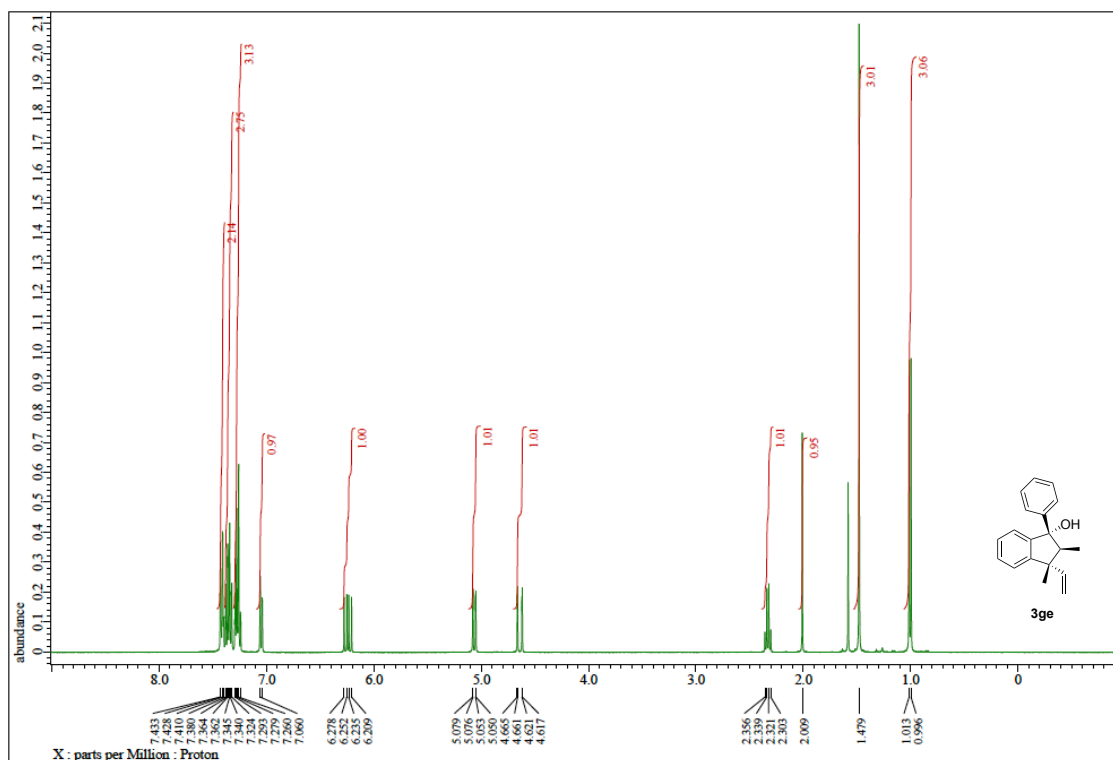

### <sup>13</sup>C NMR of 3ge (100 MHz, CDCl<sub>3</sub>)

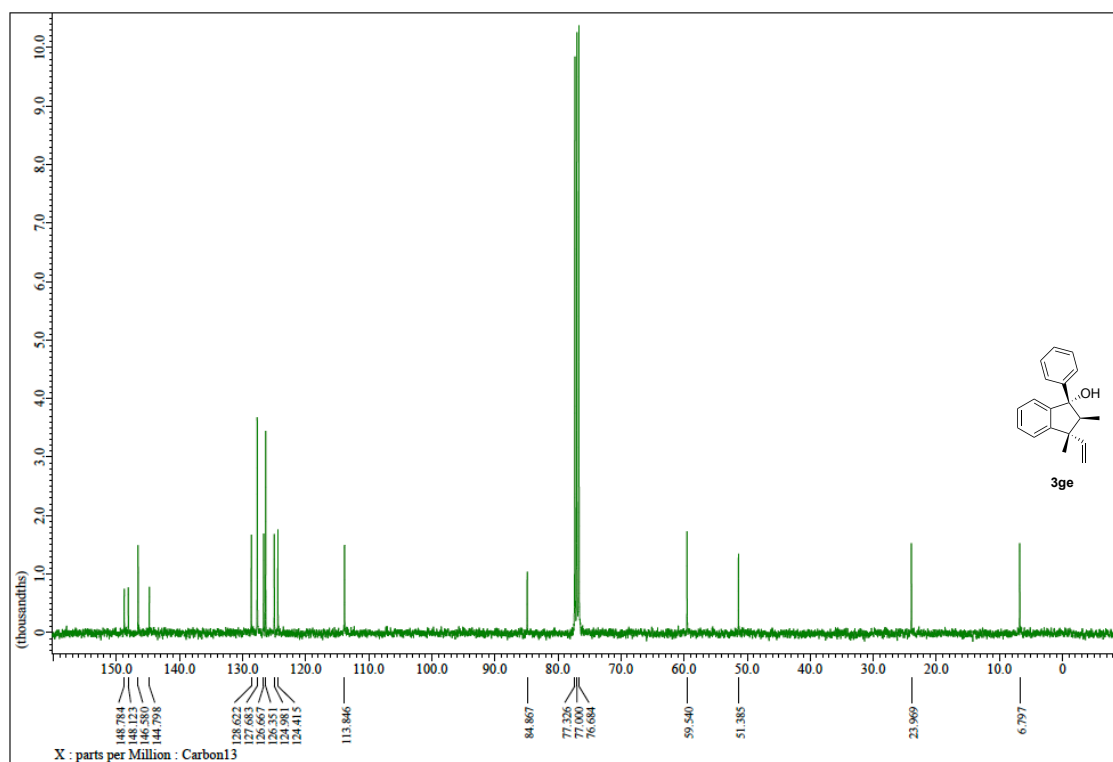

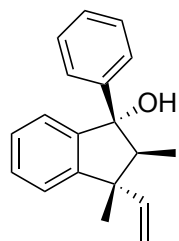

**3ge**

**HPLC chart of (*rac*)-3ge**

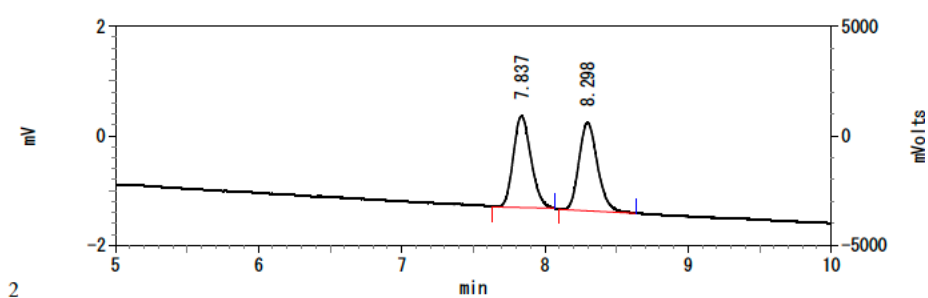

| Pk # | Retention Time | Area  | Area Percent |
|------|----------------|-------|--------------|
| 1    | 7.837          | 14357 | 49.694       |
| 2    | 8.298          | 14534 | 50.306       |

**HPLC chart of (1*R*,2*S*,3*S*)-3ge**

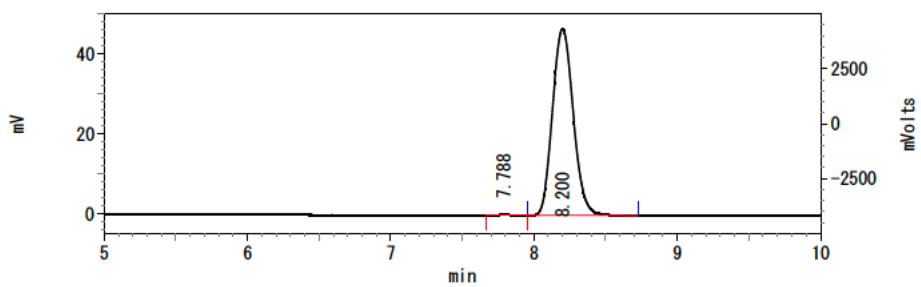

| Pk # | Retention Time | Area   | Area Percent |
|------|----------------|--------|--------------|
| 1    | 7.788          | 945    | 0.200        |
| 2    | 8.200          | 470942 | 99.800       |

### $^1\text{H}$ NMR of 3gf (400 MHz, $\text{CDCl}_3$ )

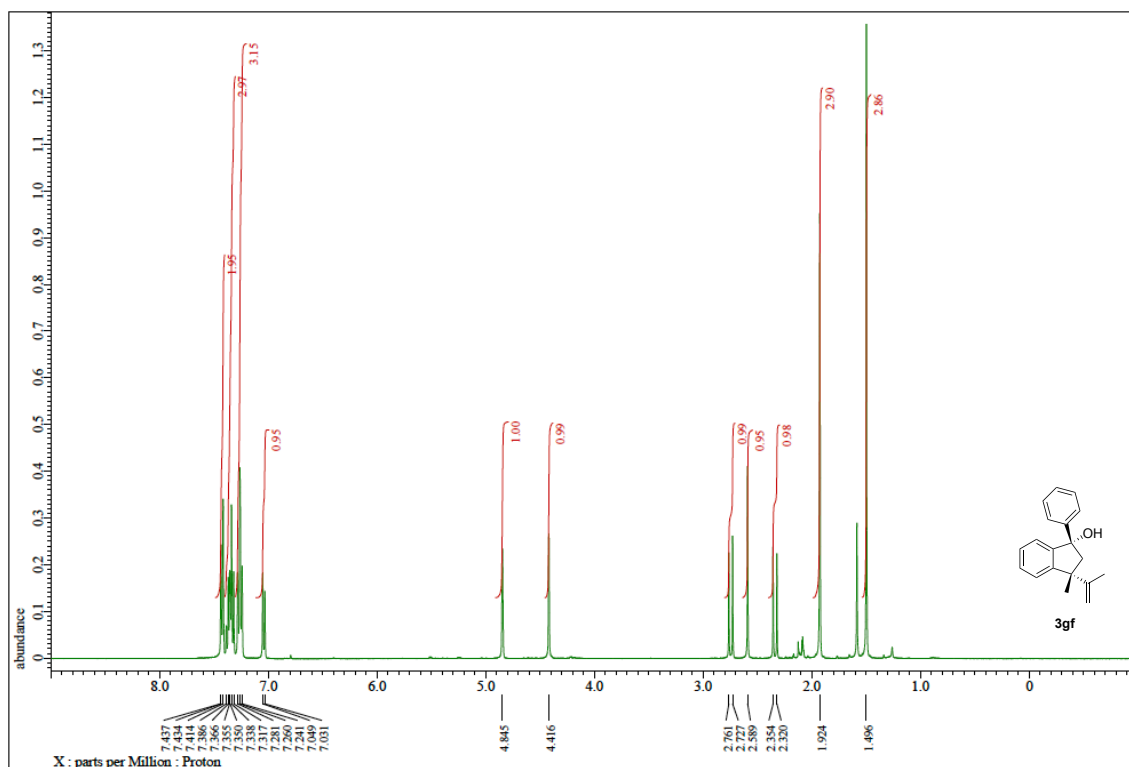

### $^{13}\text{C}$ NMR of 3gf (100 MHz, $\text{CDCl}_3$ )

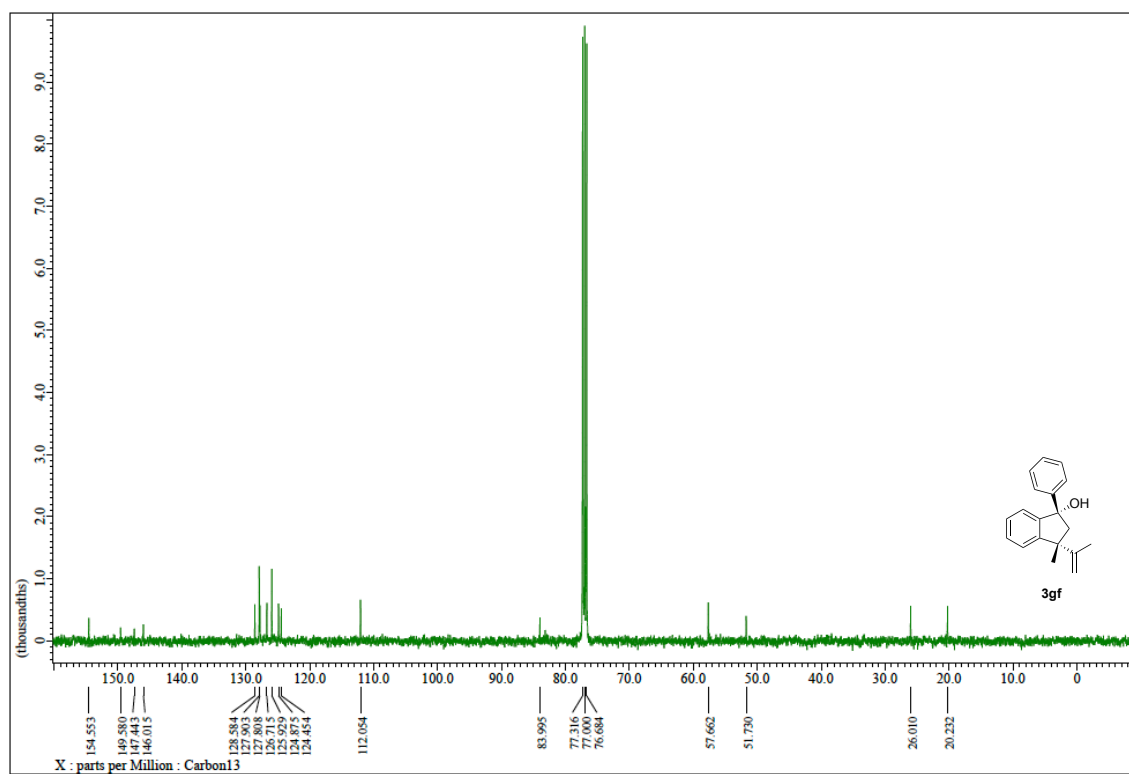

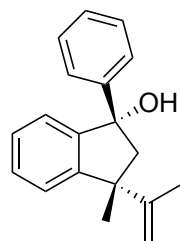

**3gf**

**HPLC chart of (*rac*)-3gf**

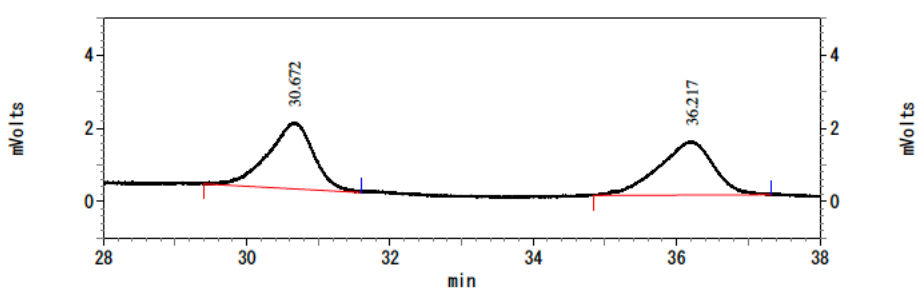

| Pk # | Retention Time | Area  | Area Percent |
|------|----------------|-------|--------------|
| 1    | 30.672         | 80144 | 50.625       |
| 2    | 36.217         | 78165 | 49.375       |

**HPLC chart of (*1R,3R*)-3gf**

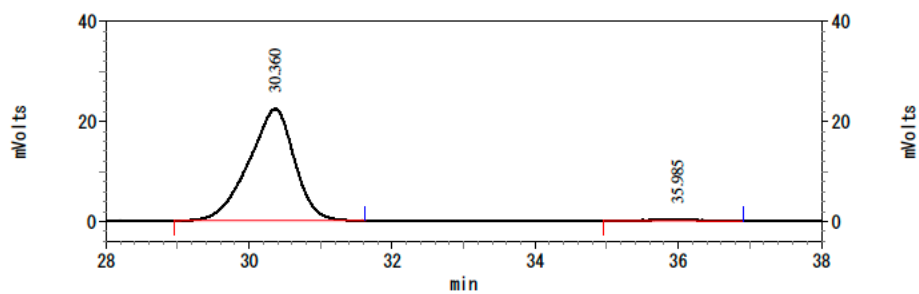

| Pk # | Retention Time | Area   | Area Percent |
|------|----------------|--------|--------------|
| 1    | 30.360         | 991752 | 98.467       |
| 2    | 35.985         | 15440  | 1.533        |

**<sup>1</sup>H NMR of 7 (400 MHz, CDCl<sub>3</sub>)**

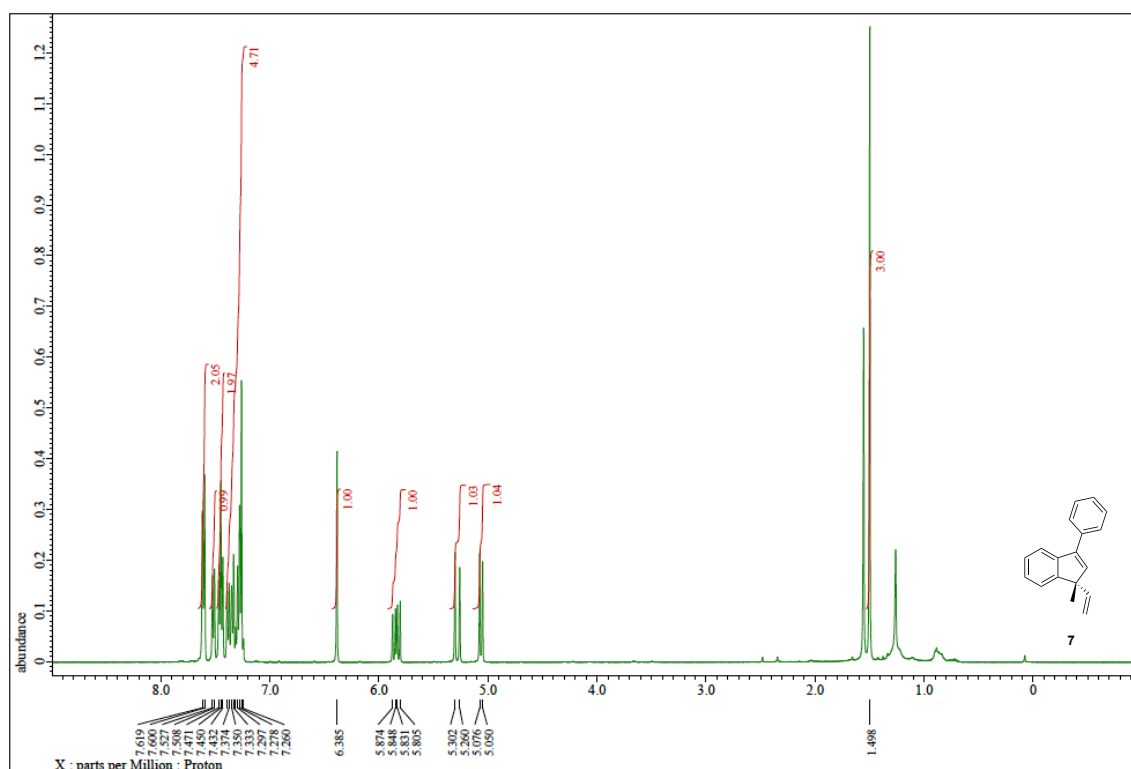

**<sup>13</sup>C NMR of 7 (400 MHz, CDCl<sub>3</sub>)**

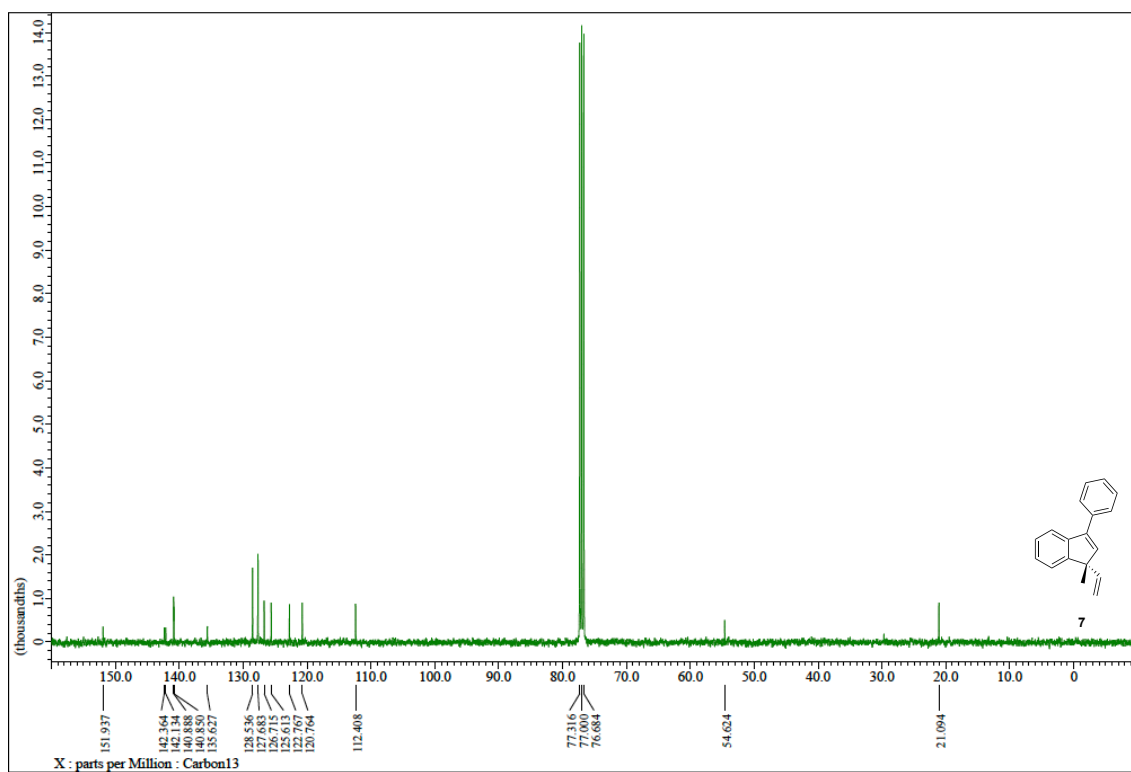

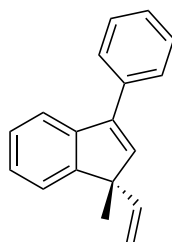

7

HPLC chart of (*rac*)-7

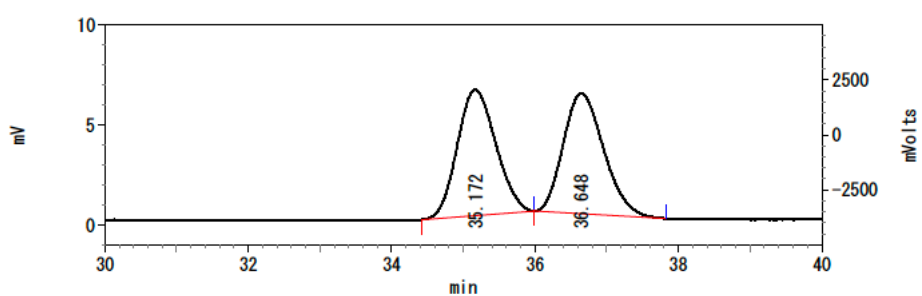

| Pk # | Retention Time | Area   | Area Percent |
|------|----------------|--------|--------------|
| 1    | 35.172         | 235020 | 49.818       |
| 2    | 36.648         | 236735 | 50.182       |

HPLC chart of (*R*)-7

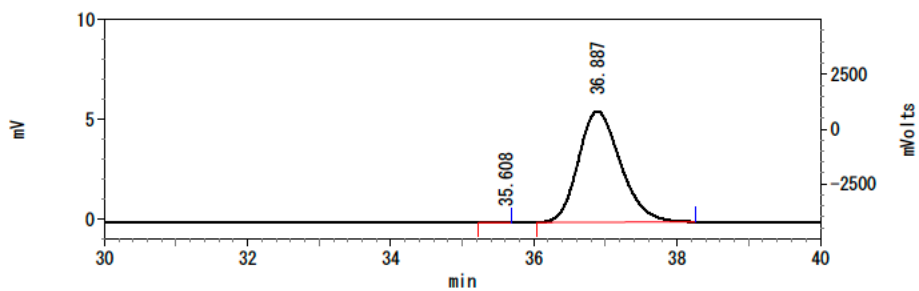

| Pk # | Retention Time | Area   | Area Percent |
|------|----------------|--------|--------------|
| 1    | 35.608         | 155    | 0.068        |
| 2    | 36.887         | 227232 | 99.932       |

**<sup>1</sup>H NMR of 8 (400 MHz, CDCl<sub>3</sub>)**

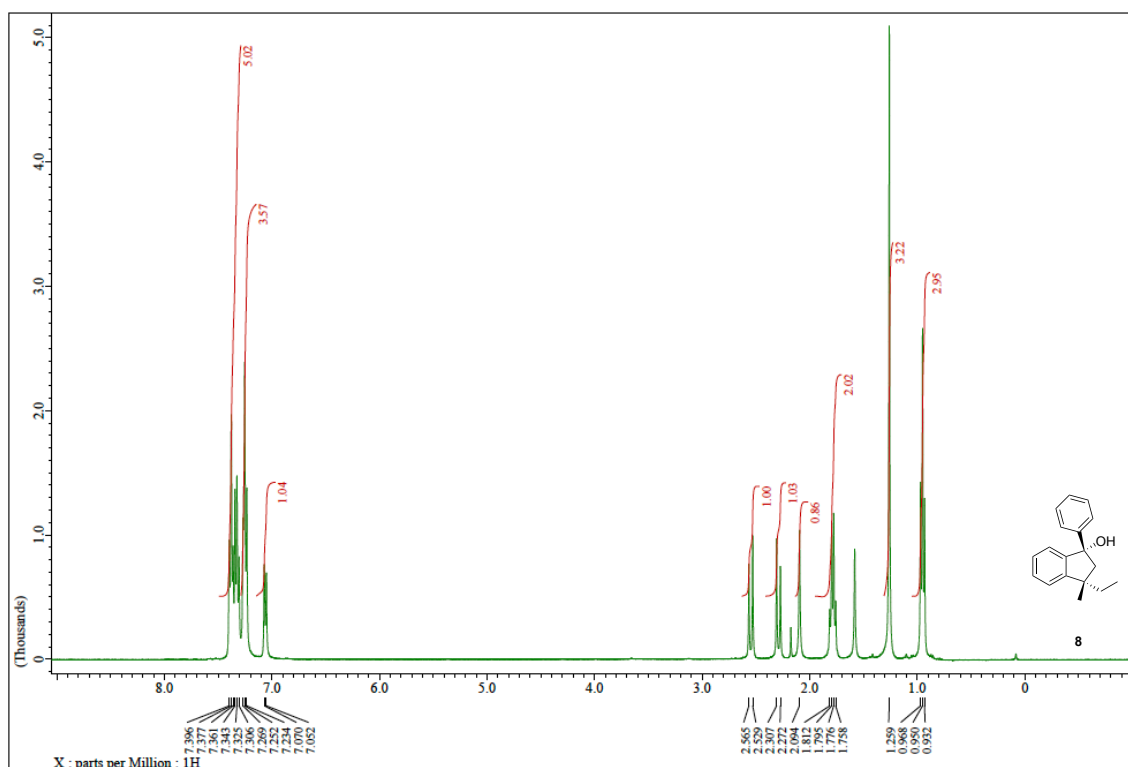

**<sup>13</sup>C NMR of 8 (100 MHz, CDCl<sub>3</sub>)**

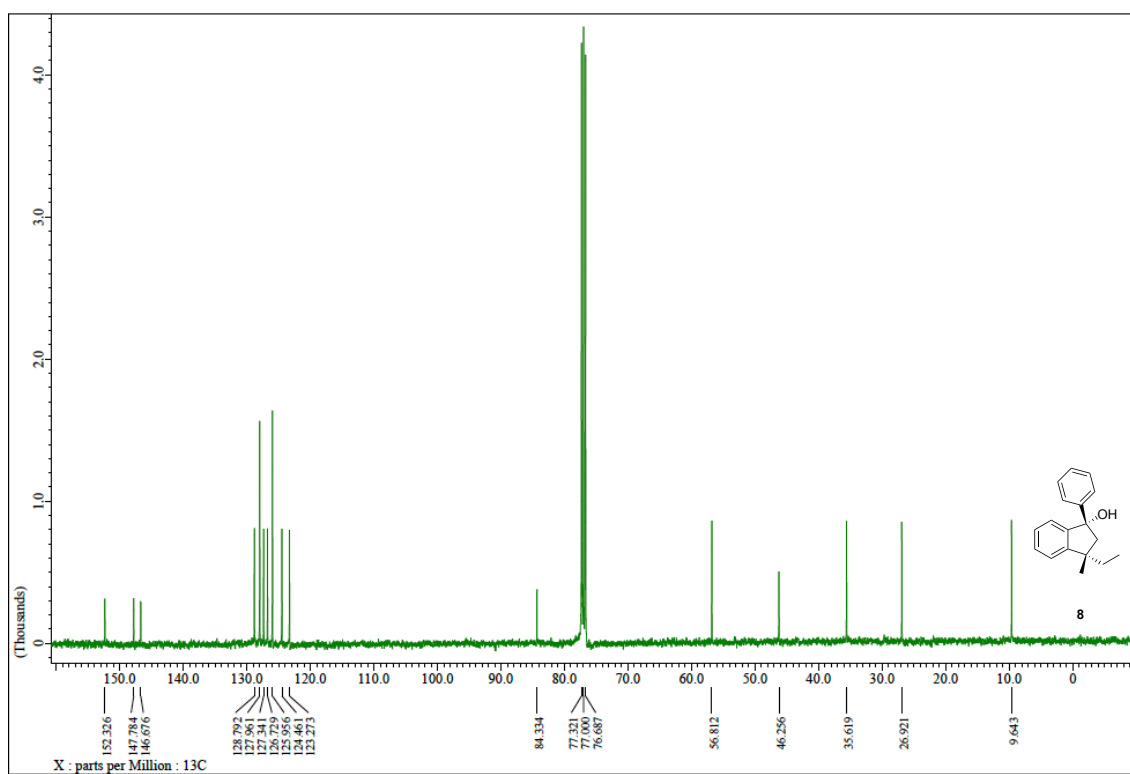

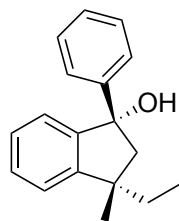

8

### HPLC chart of (*rac*)-8

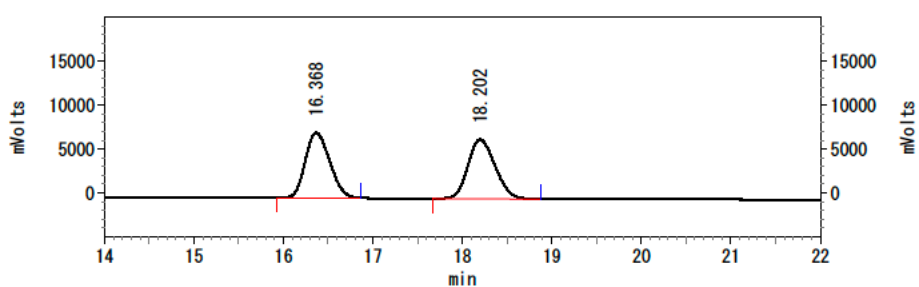

| Pk # | Retention Time | Area   | Area Percent |
|------|----------------|--------|--------------|
| 1    | 16.368         | 140751 | 49.631       |
| 2    | 18.202         | 142846 | 50.369       |

### HPLC chart of (1*R*,3*R*)-8

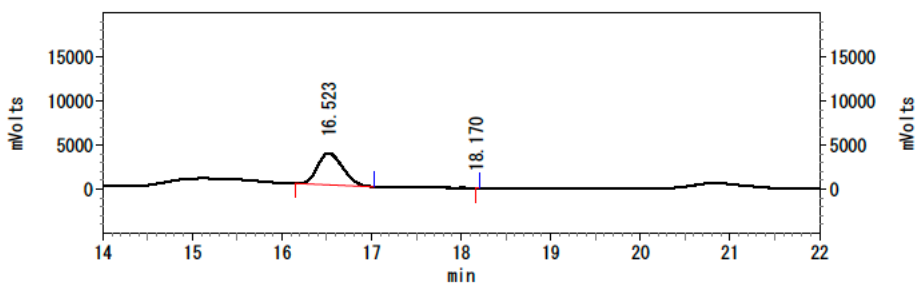

| Pk # | Retention Time | Area  | Area Percent |
|------|----------------|-------|--------------|
| 1    | 16.523         | 70599 | 99.990       |
| 2    | 18.170         | 7     | 0.010        |



**<sup>1</sup>H NMR of 9 (400 MHz, CDCl<sub>3</sub>)**

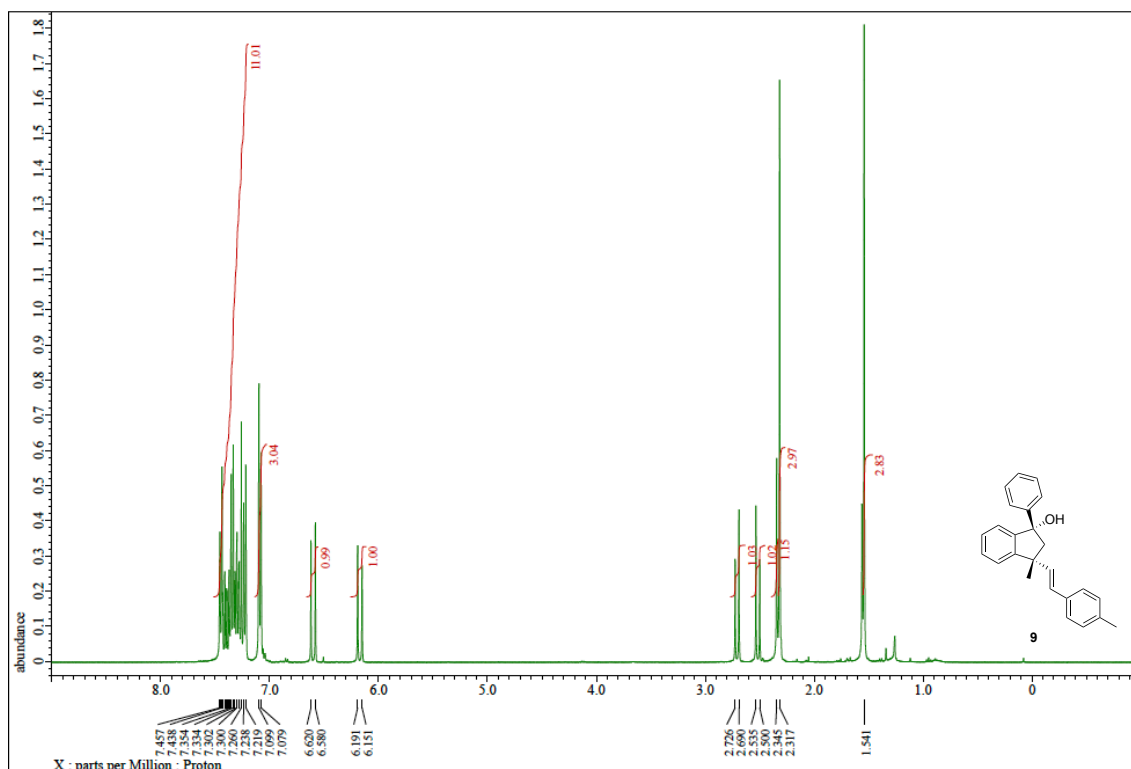

**<sup>13</sup>C NMR of 9 (100 MHz, CDCl<sub>3</sub>)**

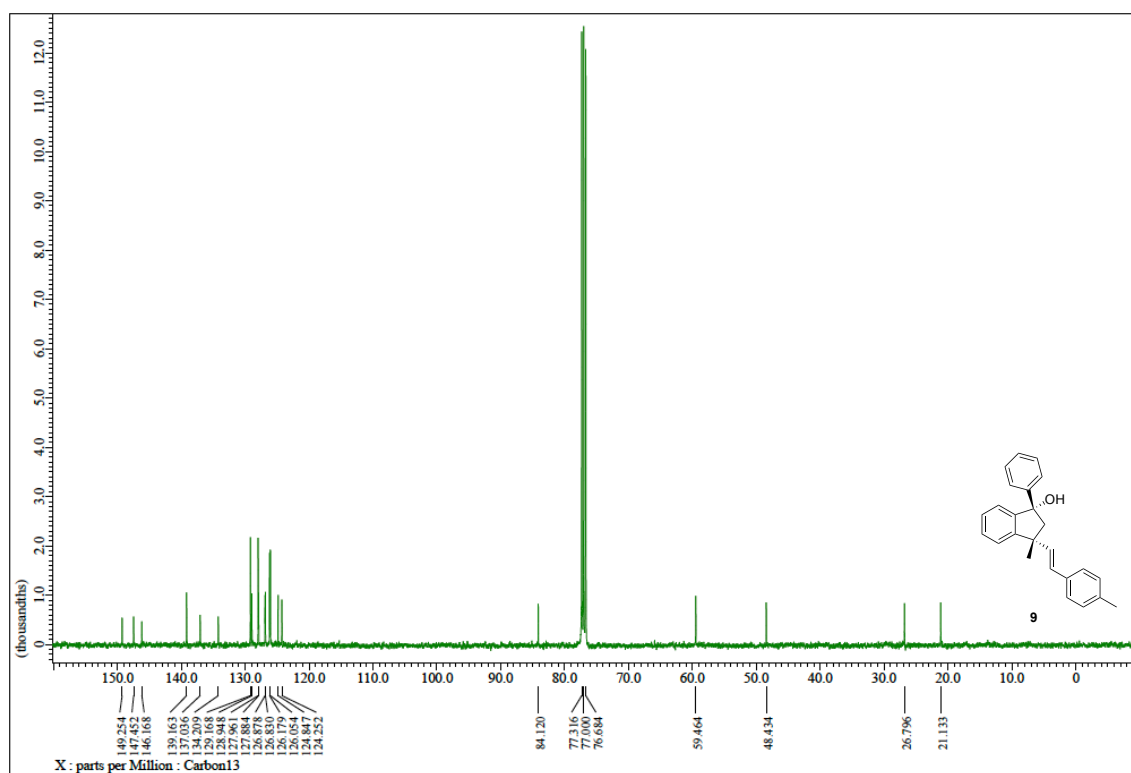

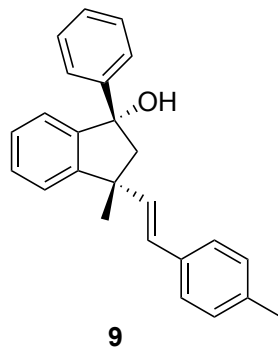

**HPLC chart of (rac)-9**

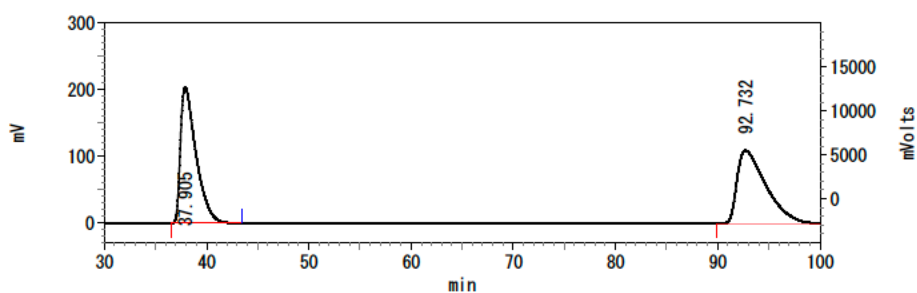

| Pk # | Retention Time | Area     | Area Percent |
|------|----------------|----------|--------------|
| 1    | 37.905         | 21660884 | 50.003       |
| 2    | 92.732         | 21658622 | 49.997       |

**HPLC chart of (1R,3R)-9**

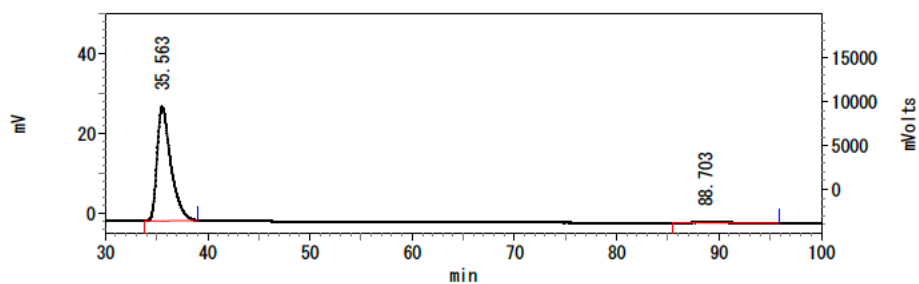

| Pk # | Retention Time | Area    | Area Percent |
|------|----------------|---------|--------------|
| 1    | 35.563         | 2682423 | 98.845       |
| 2    | 88.703         | 31353   | 1.155        |
